# Supplementary material for: Whole Genome Transcriptome Analysis of the Association between Obesity and Triple Negative Breast Cancer in Caucasian Women
Source: Preprints.org preprint supplement (doi:10.20944/preprints201803.0174.v1), 2018-03-20
Supplement: Supplementary file 1 [file Table S1.xlsx]

## Sheet: Sheet1
Table S1. List of significantly differentially expressed genes showing evidence of association between TNBC and Obesity or overweight in women with premenopausal status.
Also shown in this table is a list of significantly differentially expressed genes distinguishing obese from nonobese women.
NORMAL vs OVERWEIGHT				NORMAL vs OBESE				OVERWEIGHT vs OBESE
Gene Symbol	Cytoband	unadj.p		Gene Symbol	Cytoband	unadj.p		Gene Symbol	Cytoband	unadj.p
COX10-AS1	---	0.0001657		DUXAP8	14q11.2	9.84e-05		PAWR	12q21	0.0001173
DPY19L1	7p14.2	0.0002359		ABCG1	21q22.3	0.0001148		PRKXP1	15q26.3	0.0001609
MYL6B	12q13.13	0.0002417		IFNGR1	6q23.3	0.0001865		RPL32P3	3q21.3	0.0008389
CD84	1q24	0.0003213		TPST2	22q12.1	0.0001906		RNASET2	6q27	0.0009215
RAPGEF1	9q34.3	0.0003247		C15orf57	15q15.1	0.000205		DUXAP8	14q11.2	0.0011144
PAWR	12q21	0.0003959		SFT2D1	6q27	0.0002398		MTERF4	2q37.3	0.0011465
RPS21	20q13.3	0.0003988		SMC2	9q31.1	0.0002399		STX8	17p12	0.0013007
IL13RA1	Xq24	0.0004961		NPC2	14q24.3	0.0002506		DIO2	14q24.2-q24.3	0.001764
GABBR1	6p21.31	0.0005059		MGAT4A	2q12	0.0002564		EBAG9	8q23	0.0017957
SLF2	10q24.31	0.0005144		RNASET2	6q27	0.0002605		CLN5	13q21.1-q32	0.0019533
ZNF621	3p22.1	0.0005861		WAPL	10q23.2	0.0002609		FBXL18	7p22.2	0.0019814
TOP1MT	8q24.3	0.000644		ATXN1	6p23	0.0002669		TMED10	14q24.3	0.0020413
MMD2	10p	0.0006795		ALG5	13q13.3	0.0002704		PCMT1	6q25.1	0.0020981
N4BP2L2	13q13.1	0.0007415		PTEN	10q23.3	0.0003575		MAGEA5	Xq28	0.0021464
SNX29	16p13.13-p13.12	0.0007771		CREBL2	12p13	0.0004289		NPC2	14q24.3	0.0022541
CCDC34	11p14.1	0.0008027		SUSD6	14q24.1	0.0004474		DNAJC3	13q32.1	0.0023093
EPB41L4A	5q21.3	0.0008288		ZC3H7B	22q13.2	0.0004608		MNAT1	14q23	0.0023582
MAP3K3	17q23.3	0.0008866		ITFG1	16q12.1	0.0004971		CELF1	11p11	0.0024489
LYST	1q42.1-q42.2	0.0009304		FXN	9q21.11	0.0005272		N4BP2L2	13q13.1	0.0024614
STC2	5q35.1	0.0010748		BLVRA	7p13	0.0005416		KLF12	13q22	0.0025451
IQGAP1	15q26.1	0.0011773		ICAM3	19p13.3-p13.2	0.0005539		E2F1	20q11.2	0.0025458
KYNU	2q22.2	0.0012577		XBP1	22q12.1|22q12	0.0006705		MBNL2	13q32.1	0.0026891
FBXO28	1q42.11	0.001358		CLN5	13q21.1-q32	0.0006817		LAYN	11q23.1	0.002726
ARSD	Xp22.3	0.0014019		SEL1L	14q31	0.0006865		FBXO10	9p13.2	0.0028172
NBN	8q21	0.001535		DNAJC3	13q32.1	0.0007161		NUP62	19q13.33	0.0028683
IFNGR1	6q23.3	0.0015725		LAYN	11q23.1	0.0007351		PTPRD	9p23-p24.3	0.0028782
CASP9	1p36.21	0.001591		GPRIN3	4q22.1	0.0008329		POSTN	13q13.3	0.0035344
EHD4	15q11.1	0.00167		WIPF1	2q31.1	0.0008376		CEP128	14q31.1	0.0037169
SSH1	12q24.11	0.0016792		SET	9q34	0.0008957		TP53I11	11p11.2	0.0037492
SYN2	3p25	0.0017253		FOXN3	14q31.3	0.0009304		SLC2A11	22q11.23	0.0037811
ZNF585A	19q13.12	0.0018605		FBXO10	9p13.2	0.0009358		BTD	3p25	0.0039176
FCGR3A	1q23	0.0019379		SNX29	16p13.13-p13.12	0.0009616		CTSK	1q21	0.0040216
FLVCR2	14q24.3	0.0019403		DPYD	1p22	0.0010052		CTAGE5	14q13.3	0.0042176
MIR137HG	1p21.3	0.002124		CCDC150	2q33.1	0.0010571		NDRG2	14q11.2	0.0042609
PAPSS2	10q24	0.0021382		IL6ST	5q11.2	0.0011074		ATXN2	12q24.1	0.0047988
ATP6V1B2	8p21.3	0.0021993		ERCC8	5q12.1	0.0011133		HSPH1	13q12.3	0.0050479
ABCG1	21q22.3	0.0022002		ZNF410	14q24.3	0.0011182		ZNF430	19p12	0.0052524
TMBIM4	12q14.3	0.0022307		KYNU	2q22.2	0.0011183		KCNS3	2p24	0.0054324
2018-03-09	12q14.1	0.002259		DIO2	14q24.2-q24.3	0.0011814		EDEM1	3p26.1	0.0055094
WIPF1	2q31.1	0.0022932		CSGALNACT1	8p21.3	0.0012233		ZNF783	7q36.1	0.0055922
NKAIN3	8q12.3	0.0023103		ASAH1	8p22	0.001228		ULK2	17p11.2	0.0056056
ZMYM2	13q11-q12	0.0023816		NAGA	22q11	0.001244		RBM15	1p13	0.0056617
POLR1E	9p13.2	0.0024559		LYST	1q42.1-q42.2	0.0012565		CD2BP2	16p11.2	0.0056705
GOLGA1	9q33.3	0.0024796		CTAGE5	14q13.3	0.0013333		PTCHD1	Xp22.11	0.0057414
KMO	1q42-q44	0.0025422		CARD14	17q25	0.0013904		TPT1-AS1	13q14.13	0.005748
DAB2	5p13.1	0.0025628		PTPRF	1p34	0.0014068		GFOD1	6pter-p22.1	0.0058466
SIRPA	20p13	0.0026638		NNMT	11q23.1	0.0014417		SLC25A27	6p12.3	0.0059365
KDM3B	5q31	0.002679		HOPX	4q12	0.0014519		TACC1	8p11.22	0.0059407
PRKCH	14q23.1	0.0028478		MGAT2	14q21	0.0014701		ALG5	13q13.3	0.0060961
ZNF286A	17p11.2	0.0028702		ZNF507	19q13.11	0.001496		SFXN3	10q24.31	0.006101
PTGS1	9q32-q33.3	0.0028822		CD84	1q24	0.0015009		PRKCA	17q22-q23.2	0.0061335
PLCG1-AS1	---	0.0029005		SLC31A2	9q32	0.0015204		PTPRF	1p34	0.0061438
HMGA2	12q15	0.0029716		RABEP1	17p13.2	0.0015262		FCRL5	1q21	0.0063022
GLRX	5q14	0.0029854		SHANK2	11q13.2	0.0015481		PDCD6	5p15.33	0.0063146
APBB1IP	10p12.1	0.0031281		TMEM59	1p32.3	0.0015533		NSUN4	1p34	0.0063995
GLCCI1	7p21.3	0.0031827		CDC42SE2	5q31.1	0.0015564		DKK3	11p15.2	0.0064007
SLC31A1	9q32	0.0032394		TPT1-AS1	13q14.13	0.0015634		TNFRSF17	16p13.1	0.0064141
ZC3H12D	6q25.1	0.0032499		RPS6KB1	17q23.1	0.0015998		RAD51B	14q23-q24.2	0.0065423
LOC100421171	---	0.0032785		VPS11	11q23	0.0016107		INPP5E	9q34.3	0.0067451
ABCA1	9q31.1	0.0033085		SLC25A36	3q23	0.0016168		SPEN	1p36	0.0069526
ARHGDIB	12p12.3	0.0033664		PPP3R1	2p15	0.0016267		TMIE	3p21	0.0070629
LASP1	17q11-q21.3	0.0033675		RPL32P3	3q21.3	0.0016557		NNMT	11q23.1	0.007097
LOC105378382	---	0.0034213		CTSK	1q21	0.0017055		EIF3B	7p22.3	0.007249
PCYT1B	Xp22.11	0.0034623		ZC3H12D	6q25.1	0.0017101		NBPF3	1p36.12	0.0072677
BEND7	10p13	0.0034709		PPP1R2	3q29	0.0018066		DYNLRB1	20q11.21	0.0073407
UQCRB	8q22	0.0034994		RAD51B	14q23-q24.2	0.0018252		TOE1	1p33	0.00758
RGL3	19p13.2	0.0035347		SLA	8q24	0.0018368		HEPH	Xq11-q12	0.0077853
CASC10	10p12.31	0.0035622		EIF3B	7p22.3	0.0018447		FDX1	11q22	0.0078666
SIGLEC11	19q13.33	0.003588		NDUFAF1	15q11.2-q21.3	0.0018879		TSPAN31	12q13.3	0.0078861
MLF1	3q25.1	0.0036008		ITGA4	2q31.3	0.0019506		ZC3H14	14q31.3	0.0081562
NCOA3	20q12	0.0037085		PTPRE	10q26	0.0019691		PTEN	10q23.3	0.0082038
GIT2	12q24.1	0.0037291		TMED10	14q24.3	0.0019821		LOC100129029	2q24.1	0.008211
LINC00662	19q11	0.0038016		MPV17	2p23.3	0.0019929		RNASE4	14q11	0.008262
SH3YL1	2p25.3	0.0038336		ACRV1	11q24.2	0.002003		GABARAP	17p13.1	0.0084102
PBX3	9q33.3	0.0039166		POLR1E	9p13.2	0.0020151		MLH3	14q24.3	0.0084799
HPS1	10q23.1-q23.3	0.0039416		IL13RA1	Xq24	0.0020164		HERPUD1	16q13	0.0085575
IDS	Xq28	0.0039449		FAM69A	1p22.1	0.0020215		NCOA6	20q11	0.0086197
LINC00330	13q14.11	0.0040921		ELOVL5	6p12.1	0.0020354		ST3GAL3	1p34.1	0.0086601
TMEM147-AS1	---	0.0040936		FCHO2	5q13.2	0.0020385		MGAT2	14q21	0.0088926
RSRC1	3q25.32	0.0041318		UBL3	13q12-q13	0.0020781		DECR1	8q21.3	0.0089424
FCGR3B	1q23	0.0041769		DNAJB9	7q31|14q24.2-q24.3	0.00208		CARD14	17q25	0.0089664
CLCN4	Xp22.3	0.0041918		MED25	19q13.3	0.0021162		CCDC150	2q33.1	0.0089801
GPR180	13q32.1	0.0042043		IL4R	16p12.1-p11.2	0.0021262		PSMD4	1q21.3	0.0091511
CHPT1	12q	0.0042093		PTPN22	1p13.2	0.0021427		MLXIP	12q24.31	0.0091815
TRIP12	2q36.3	0.0042181		PRKCH	14q23.1	0.0021884		API5	11p11.2	0.0093965
ATP7A	Xq21.1	0.0042346		TMBIM6	12q13.12	0.0021979		SOX13	1q32	0.0094693
FKBP15	9q32	0.0043075		MTSS1L	16q22.1	0.002257		FNDC3A	13q14.2	0.0096138
NAIP	5q13.2	0.0043341		EVI2A	17q11.2	0.0022577		SLC6A8	Xq28	0.0096185
MAP3K2	2q14.3	0.0043497		FAS	10q24.1	0.0022691		ZMAT3	3q26.32	0.0096295
CR1	1q32	0.0044058		BTK	Xq21.33-q22	0.0022738		SET	9q34	0.0097037
OGFR	20q13.3	0.0044491		NSF	17q21	0.0023299		RB1	13q14.2	0.0097327
ANKH	5p15.1	0.0044819		IFNAR1	21q22.11	0.002353		DNAJB9	7q31|14q24.2-q24.3	0.0097603
TNFRSF11A	18q22.1	0.0045349		GLUD1	10q23.3	0.0024127		RAPGEF5	7p15.3	0.0100408
NOS1	12q24.22	0.0045844		ST8SIA1	12p12.1-p11.2	0.00243		NOL4L	20q11.21	0.0101001
RPS6KB1	17q23.1	0.0046453		TLR2	4q32	0.0024397		ZCCHC7	9p13.2	0.0101645
TRIM23	5q12.3	0.0046492		MAGEA5	Xq28	0.0025072		CEP350	1q25.2	0.0103576
GCAT	22q13.1	0.0046806		FLVCR2	14q24.3	0.0025231		RPL23	17q	0.0103915
PTPRO	12p13.3-p13.2|12p13-p12	0.0047322		CD53	1p13	0.0025331		LOC645513	4q26	0.0104169
MICA	6p21.3	0.0047843		MID1	Xp22	0.0025601		SCGB2A1	11q13	0.0105425
USP9Y	Yq11.2	0.0048756		FNDC3A	13q14.2	0.0025852		PPM1A	14q23.1	0.0107741
LOC101928303	---	0.0049558		DAB2	5p13.1	0.0026005		GLIPR1	12q21.2	0.0107885
CTTN	11q13	0.0049567		NUP62	19q13.33	0.00261		HIP1	7q11.23	0.0108959
HCN4	15q24.1	0.0050336		LEPROT	1p31.3	0.0026564		LINC00476	9q22.32	0.0109004
RAB7A	3q21.3	0.0050874		TMBIM4	12q14.3	0.0026711		DEDD	1q23.3	0.0110767
TP53I11	11p11.2	0.0050881		AXL	19q13.1	0.0026951		ZNF568	19q13.12	0.0111575
VPS11	11q23	0.005212		ULK2	17p11.2	0.00279		RAPGEF1	9q34.3	0.0111626
CDYL2	16q23.2	0.005236		GALNT1	18q12.1	0.0028374		PAPPA	9q33.2	0.0111948
SYTL3	6q25.3	0.0053025		HLA-DPB1	6p21.3	0.0028447		CD44	11p13	0.01126
LRRFIP1	2q37.3	0.0053112		SERPINA1	14q32.1	0.0028576		WISP1	8q24.22	0.0114096
ZNF239	10q11.22-q11.23	0.0053123		FOXO1	13q14.1	0.0028816		XBP1	22q12.1|22q12	0.0114127
CSGALNACT1	8p21.3	0.0053394		DBN1	5q35.3	0.0028904		BRWD3	Xq21.1	0.0114473
LOC101928909	---	0.0054183		PCMT1	6q25.1	0.0028936		SUSD6	14q24.1	0.0114818
ARPC1A	7q22.1	0.0054502		EDEM1	3p26.1	0.0029048		RBM15B	3p21.2	0.0115125
ACP5	19p13.2	0.0055328		BTG1	12q22	0.0029231		TERT	5p15.33	0.0115788
SRSF7	2p22.1	0.0055539		TRAPPC13	5q12.3	0.0030246		ARHGEF12	11q23.3	0.0116497
MYO5A	15q21	0.0055937		RHBDD3	22q12.2	0.0030294		TMEM59	1p32.3	0.0117325
AGA	4q34.3	0.0056389		GLIPR1	12q21.2	0.0030864		EDIL3	5q14	0.0117386
IRF5	7q32	0.0056688		PUM3	9p24.2	0.0030869		LOC646762	7p14.3	0.0118157
SH2D3C	9q34.11	0.0056898		MCM3AP-AS1	21q22.3	0.0031041		GABBR1	6p21.31	0.0118901
HS6ST3	13q32.1	0.0058828		C6orf89	6p21.2	0.0031254		RASEF	9q21.32	0.0120021
NIPA1	15q11.2	0.0059666		GLRX	5q14	0.0031258		TIGD4	4q31.3	0.0120814
ATP5SL	19q13.2	0.005971		IL7R	5p13	0.0032438		DOPEY1	6q15	0.0120897
LOC283435	12q24.32	0.006026		SAR1B	5q31.1	0.0032811		GALNT1	18q12.1	0.0121365
SYNCRIP	6q14-q15	0.0060822		KIAA0513	16q24.1	0.0033231		SSPN	12p11.2	0.0122044
BTK	Xq21.33-q22	0.006113		CALCOCO2	17q21.32	0.0033281		FOXN3	14q31.3	0.0122243
VTI1A	10q25.2	0.0063931		MTERF4	2q37.3	0.0033387		RPS6KA1	1p	0.0123052
NDUFAF6	8q22.1	0.0064431		NBR1	17q21.31	0.0033449		RNF170	8p11.21	0.0123449
DHX36	3q25.2	0.0064432		CCDC86	11q12.2	0.0033568		IL27RA	19p13.11	0.0124572
SAR1B	5q31.1	0.0065183		MICA	6p21.3	0.0033698		ICAM3	19p13.3-p13.2	0.0126079
ERAP1	5q15	0.0065417		PAPPA	9q33.2	0.0034197		NDUFB1	14q32.12	0.0127602
PPFIBP1	12p12.1	0.0065731		E2F3	6p22	0.0034374		RIMS2	8q22.3	0.0129923
ITGB3	17q21.32	0.0066498		ADAM28	8p21.2	0.0034585		COL3A1	2q31	0.0130616
XIAP	Xq25	0.0066513		GLCCI1	7p21.3	0.0034858		LOC642852	21q22.3	0.013182
UBE2D3	4q24	0.0067019		XK	Xp21.1	0.0035403		USF3	3q13.2	0.0132162
ASXL2	2p24.1	0.0067126		CCR2	3p21.31	0.0035522		MGEA5	10q24.1-q24.3	0.0132889
ABCC4	13q32	0.0067798		CDYL2	16q23.2	0.0035551		TPR	1q25	0.0133084
USP36	17q25.3	0.0067955		NAIP	5q13.2	0.0037059		SEC62	3q26.2	0.0134164
TRDN	6q22.31	0.006818		MAP3K5	6q22.33	0.0037245		ATP6V0E1	5q35.1	0.0135577
EFNB3	17p13.1	0.006824		EPHA7	6q16.1	0.00373		TNRC6A	16p11.2	0.0135686
APOC2	19q	0.0068273		TOR1AIP1	1q24.2	0.0037558		SP100	2q37.1	0.0135829
PAH	12q22-q24.2	0.0068532		NCAPH2	22q13.33	0.0037806		TRAM1	8q13.3	0.0136131
SPTLC2	14q24.3	0.0069777		KIF23	15q23	0.0037907		PCSK6	15q26.3	0.0136502
LOC643711	12q23.1	0.0070417		TRIP12	2q36.3	0.0037993		SAMM50	22q13.31	0.0137683
DGKA	12q13.3	0.0070524		E2F1	20q11.2	0.0038375		RAB32	6q24.3	0.0138648
SERPIND1	22q11.21	0.0070607		ALOX5	10q11.2	0.0038568		PKP4	2q24.1	0.0139053
LOC102724612	8q12.3	0.0071363		BTD	3p25	0.003866		LINC00622	1p12	0.0139091
ASAH1	8p22	0.0071928		SPTLC2	14q24.3	0.003917		SCRN1	7p14.3	0.0139321
FFAR1	19q13.1	0.0073554		SLC7A1	13q12.3	0.0039221		TERF2IP	16q23.1	0.0140136
LOC105370978	---	0.0074117		ZBTB5	9p13.2	0.0039293		SMG7	1q25	0.0142055
MGEA5	10q24.1-q24.3	0.0075079		INHBA	7p15-p13	0.003936		GTF2H5	6q25.3	0.0142478
CSAD	12q13.11-q14.3	0.007552		IRF8	16q24.1	0.004017		FBXO28	1q42.11	0.0142503
DNAL4	22q13.1	0.0075651		PTPRC	1q31-q32	0.0041147		EFNB3	17p13.1	0.0144875
TPD52	8q21.13	0.0075698		HAVCR2	5q33.3	0.0041163		TAF6	7q22.1	0.0145298
PKNOX1	21q22.3	0.0075747		HLA-DMB	6p21.3	0.0041459		TM2D1	1p31.3	0.0145721
CMAHP	6p21.32	0.0075858		SFXN3	10q24.31	0.0041486		MVB12B	9q33.3	0.014632
WNK1	12p13.3	0.0075931		ATG7	3p25.3	0.0042377		PEX2	8q21.1	0.0146369
LOC101928937	---	0.00764		SIAE	11q24	0.0043181		DICER1-AS1	14q32.13	0.0146411
SIK3	11q23.3	0.0076637		TCFL5	20q13.33	0.0043246		SLC7A1	13q12.3	0.0147096
SLCO2B1	11q13	0.0076922		SPOP	17q21.33	0.0044456		PHKB	16q12-q13	0.0148439
FAM120A	9q22.31	0.0077003		TOP2A	17q21.2	0.0044771		IFT43	14q24.3	0.0148556
SLC1A2	11p13-p12	0.0077653		HERPUD1	16q13	0.0045886		CNN1	19p13.2-p13.1	0.0149116
C8orf31	8q24.3	0.0077658		SLC7A7	14q11.2	0.0046188		LGALS1	22q13.1	0.0150986
SLA	8q24	0.0078397		GRN	17q21.32	0.0046197		TPBG	6q14-q15	0.0151808
PPARA	22q13.31	0.007956		C10orf128	10q11.23	0.0046438		RECQL5	17q25	0.0152107
TBC1D10A	22q12.2	0.0079933		AKNAD1	1p13.3	0.004739		PGM2L1	11q13.4	0.0152455
CLEC12A	12p13.2	0.008		GAGE1	Xp11	0.0047976		AMPD1	1p13	0.0153331
TPP1	11p15	0.0080072		ARPP21	3p22.3	0.0048508		ATL2	2p22.3	0.0154088
SLC2A13	12q12	0.0080414		MMD2	10p	0.0048803		AKAP7	6q23	0.0155173
CTSA	20q13.1	0.0081077		MIR137HG	1p21.3	0.0048829		AKR1C1	10p15-p14	0.0155401
LOC643201	5q35.2	0.008108		RHOH	4p13	0.0049594		SUPT7L	2p23.3	0.0157223
FAM126B	2q33.1	0.0081584		DSE	6q22	0.0049758		CALM1	14q32.11	0.0158535
LINC01120	2q21.1	0.0081735		BASP1	5p15.1	0.0050531		AGBL3	7q33	0.0159813
PIGL	17p11.2	0.0081935		LEKR1	3q25.31	0.0051495		CBFA2T2	20q11	0.0160715
LOC105372953	---	0.0081966		TBX19	1q24.2	0.0051808		PMM1	22q13.2	0.0161232
LOC100506730	1p36	0.0082303		PLXNA1	3q21.3	0.0051872		PCCA	13q32	0.0162129
SERPINB5	18q21.33	0.008275		LYPD8	1q44	0.0052067		PPP1R7	2q37.3	0.016351
GRN	17q21.32	0.0082976		ATP6V0E1	5q35.1	0.0052222		ZNF410	14q24.3	0.0163895
SUGT1P1	9p13.3	0.0083041		PLXNC1	12q23.3	0.0052229		CD276	15q23-q24	0.0164184
ABHD2	15q26.1	0.0083221		TFEC	7q31.2	0.0052749		TRRAP	7q21.2-q22.1	0.0165582
2018-03-11	5p15.1	0.0083423		RGS13	1q31.2	0.0053012		MATR3	5q31.2	0.0166973
CRYBB2	22q11.2-q12.1	0.008352		LYRM1	16p11.2	0.0053172		DYNLT1	6q25.2-q25.3	0.0168197
GJD3	17q21.2	0.008353		SEC62	3q26.2	0.0053852		NAP1L1	12q21.2	0.0168636
SLC24A1	15q22	0.0084049		PHKB	16q12-q13	0.0053883		LOC100422781	---	0.0169617
IKZF2	2q34	0.0084194		BANK1	4q24	0.0054167		SZT2	1p34.2	0.016971
CHST1	11p11.2	0.008524		PTGS1	9q32-q33.3	0.0054335		CAPRIN1	11p13	0.0170787
DNAH1	3p21.1	0.0086253		ITPR1	3p26.1	0.0054391		TCOF1	5q32	0.017154
OSGIN2	8q21	0.0087148		EFS	14q11.2	0.0054888		HCN4	15q24.1	0.0171842
SEC16B	1q25.2	0.0087193		TGFBR1	9q22	0.0055212		SPCS2	11q13.4	0.0172
MPP1	Xq28	0.0087461		CIB2	15q24	0.0055366		FKBP1B	2p23.3	0.0173027
EGFR	7p12	0.0087523		NAGLU	17q21	0.0055386		ANKRD20A5P	18p11.21	0.0173619
EFCAB14	1p33	0.0087961		PTPRN2	7q36	0.0056041		METTL15	11p14.1	0.0174849
RHOA	3p21.3	0.0088631		ESR1	6q25.1	0.0056581		SLC5A3	21q22.12	0.0174914
PTPN22	1p13.2	0.0088791		PAPD7	5p15	0.0057823		CIB2	15q24	0.0174936
DISC1	1q42.1	0.0089416		SAMSN1	21q11	0.0059064		TFAM	10q21	0.0175071
ANKRD20A1	2q11.1	0.0089423		ATP6V1B2	8p21.3	0.0059481		GRIA3	Xq25	0.0176129
LOC105371232	---	0.0089773		INPP5E	9q34.3	0.0059643		SLC16A2	Xq13.2	0.0176154
DPY19L2P3	7p15.1	0.0090245		DOCK2	5q35.1	0.0060077		BMPR1A	10q22.3	0.0176999
KPNA1	3q21	0.0090347		LIPA	10q23.2-q23.3	0.0061251		RBMX2	Xq26.1	0.0177161
HCLS1	3q13	0.009083		FGFR2	10q26	0.0061419		MUT	6p12.3	0.0177551
AGAP11	10q23.2	0.009112		SOX4	6p22.3	0.0061843		OSGIN2	8q21	0.017955
SNED1	2q37.3	0.0091447		PPM1A	14q23.1	0.0062056		MAATS1	3q13.33	0.0179749
DACT2	6q27	0.0091688		BCL11A	2p16.1	0.0062661		NUCB2	11p15.1	0.0181084
ITGAX	16p11.2	0.009237		WISP1	8q24.22	0.0062941		GALC	14q31	0.0183004
LY86	6p25.1	0.0092895		EMP3	19q13.3	0.0062976		INHBA	7p15-p13	0.0183687
ST3GAL3	1p34.1	0.0093121		TWF1	12q12	0.0063026		DCN	12q21.33	0.0183833
CTSB	8p22	0.0093213		CASP1	11q23	0.0063176		LOC284080	17q21.33	0.0184312
ZNF93	19p12	0.0093235		MYO10	5p15.1	0.0063186		TREML3P	6p21.1	0.0185621
INPP5D	2q37.1	0.009461		ATP8A1	4p13	0.0063338		NDST1	5q33.1	0.0186029
MGAT4A	2q12	0.0095762		ST8SIA4	5q21	0.0063553		GARNL3	9q33.3	0.0186983
MATN2	8q22	0.009586		INPP4A	2q11.2	0.0063692		ANP32A	15q23	0.0187031
KSR2	12q24.22-q24.23	0.0095899		SLCO2B1	11q13	0.0064225		SPAG7	17p13.2	0.0187261
ANKMY1	2q37.3	0.0096585		GALC	14q31	0.0064449		GLUD1	10q23.3	0.0188248
LOC105377458	---	0.0096606		JAK1	1p32.3-p31.3	0.006464		ZFP42	4q35.2	0.0190126
DEFB107A	8p23.1	0.0096764		TERF2IP	16q23.1	0.0064653		LRRC3C	17q21.1	0.0191233
ATP9B	18q23	0.009717		DCN	12q21.33	0.0064732		TENM1	Xq25	0.019394
KLC3	19q13	0.0097171		PQLC2L	3q25.32	0.0065245		RBFOX1	16p13.3	0.0194413
PTPN9	15q24.2	0.0098568		TSPAN31	12q13.3	0.0065842		FGFR2	10q26	0.0195411
HIF1A	14q23.2	0.0098797		MAN2A1	5q21.3	0.0066717		MAP4K4	2q11.2-q12	0.0195445
PCBD2	5q31.1	0.0099653		GPR137B	1q42-q43	0.0066935		MAN2A2	15q26.1	0.0196855
MPHOSPH9	12q24.31	0.0100623		TSNARE1	8q24.3	0.0067092		PAPD7	5p15	0.019727
ZC3H14	14q31.3	0.0100739		ADORA3	1p13.2	0.0067699		ESPL1	12q	0.0200118
SPAG11A	8p23.1	0.0101165		KMO	1q42-q44	0.0067746		PKD2	4q22.1	0.0200201
HSPH1	13q12.3	0.0101458		GAL3ST3	11q13.1	0.0068115		LZTS1	8p22	0.0201144
IKZF1	7p12.2	0.0101753		FECH	18q21.3	0.0068183		SURF1	9q34.2	0.0201461
PPP5D1	---	0.0101904		TMCC2	1q32.1	0.0068386		MGC57346	17q21.31	0.0202277
ARL10	5q35.2	0.0101973		UBE2B	5q31.1	0.0068657		PANX1	11q21	0.0203241
SF3B1	2q33.1	0.0102941		KLRK1	12p13.2-p12.3	0.0068658		ST18	8q11.23	0.020517
RANBP9	6p23	0.0103097		ITGB2	21q22.3	0.0069129		INTS4	11q14.1	0.0205252
CTSD	11p15.5	0.0103958		ITM2A	Xq13.3-Xq21.2	0.0070063		LATS1	6q25.1	0.0205269
ACAP2	3q29	0.0104865		SLC22A5	5q23.3	0.0070865		FAM20B	1q25	0.0207213
KCNIP3	2q21.1	0.0105608		TET3	2p13.1	0.0071161		SEC16B	1q25.2	0.0207471
RPAIN	17p13.2	0.0105979		DKC1	Xq28	0.0071228		EFCAB14	1p33	0.0209058
CIRBP	19p13.3	0.0107036		FCRL5	1q21	0.0071559		ZMYM2	13q11-q12	0.0209819
MKNK1	1p33	0.01071		CYBB	Xp21.1	0.0072873		SLC22A7	6p21.1	0.0209872
DLX1	2q32	0.0107176		SEC23IP	10q25-q26	0.0072882		ARHGAP26-AS1	---	0.0210798
LOXL2	8p21.3	0.0107574		MED13	17q22-q23	0.0073356		C6orf89	6p21.2	0.0211039
LOC101929153	5p15.32	0.0107927		SHOC2	10q25	0.0073391		RPS29	14q	0.0214164
GRSF1	4q13	0.0108154		TBC1D12	10q23.33	0.0073827		SPOP	17q21.33	0.0214672
PTK2	8q24.3	0.0108772		NRIP1	21q11.2	0.0074101		LOC105372966	---	0.0215634
ABCF3	3q27.1	0.0108909		DOCK4	7q31.1	0.00746		ST7L	1p13.2	0.0216398
SNCA	4q21	0.0108967		GAS7	17p13.1	0.0075527		SLC35G3	17q12	0.0216764
IFNAR1	21q22.11	0.0109537		SGK1	6q23	0.0075608		GPR180	13q32.1	0.0217959
SLC18A1	8p21.3	0.010973		GPR82	Xp11.4	0.0075732		PPRC1	10q24.32	0.0218192
RAC1	7p22	0.0110363		CD58	1p13	0.0076493		CBY1	22q12	0.0219311
APOB	2p24-p23	0.0110642		TFDP2	3q23	0.0076703		TMED5	1p22.1	0.0219377
HDAC2	6q21	0.0111355		IGFBP7	4q12	0.0077235		CENPI	Xq22.1	0.0219627
HNRNPDL	4q21.22	0.0111613		ALKBH1	14q24.3	0.0077312		LYRM1	16p11.2	0.0220278
MPO	17q23.1	0.0112916		RPS6KA2	6q27	0.0078251		CCDC85B	11q12.1	0.0220685
RPUSD3	3p25.3	0.0113594		SNX17	2p23.3	0.0080354		EXT1	8q24.11	0.0222199
PUM3	9p24.2	0.0113648		PIF1	15q22.31	0.0080902		BECN1	17q21	0.0222748
SLK	10q24.33	0.0113858		LOC375196	2p22.3	0.0080929		LINC01588	14q21.3	0.0222862
NLRX1	11q23.3	0.0114053		MAST4	5q12.3	0.0080937		LOC100132356	5p12	0.0222888
ERN1	17q24.2	0.0114923		PSMD4	1q21.3	0.0082166		TBX19	1q24.2	0.0223546
LINC00910	17q21.31	0.0115303		PIK3CG	7q22.3	0.0082227		GPSM2	1p13.3	0.0224212
PLXNC1	12q23.3	0.0115541		UBE4B	1p36.3	0.008278		SIM1	6q16.3	0.0224526
SENP6	6q14.1	0.0116034		ARHGAP32	11q24.3	0.0082894		FOXJ3	1p34.2	0.0224537
KRTAP7-1	21q22.11	0.0116247		CLEC2B	12p13-p12	0.0082968		UBAP2L	1q21.3	0.0224579
SCAND2P	15q25.2	0.0116441		MTAP	9p21	0.0083397		GSTM1	1p13.3	0.0225939
CEBPG	19q13.11	0.0116874		MARCKS	6q22.2	0.0084237		TRIM2	4q31.3	0.0227739
NRP1	10p12	0.0117549		SLFN13	17q12	0.0084912		WDR20	14q32.31	0.0228322
SRSF1	17q22	0.0117781		RGS1	1q31	0.0085383		TRPM1	15q13.3	0.0229516
PXK	3p14.3	0.0117955		ETV4	17q21.31	0.0085494		ABCC5	3q27	0.0230278
RAB30	11q14.1	0.0119853		AGA	4q34.3	0.0085645		RCBTB2	13q14.3	0.023053
VPS50	7q21.3	0.0120349		STAT4	2q32.2-q32.3	0.0085732		MAP2K4	17p12	0.0230865
CSPP1	8q13.2	0.0120942		CNIH1	14q22.2	0.0086028		TTF2	1p22	0.0231182
LMLN	3q29	0.0120975		SF3B1	2q33.1	0.0087264		ITFG1	16q12.1	0.0231537
INSL3	19p13.2-p12	0.0121108		TCF4	18q21.1	0.0087271		SEL1L	14q31	0.0232691
PIK3R2	19q13.2-q13.4	0.0121417		FABP6	5q33.3-q34	0.0087406		CYBA	16q24	0.0234071
KRT17	17q21.2	0.012258		LINC01134	1p36.32	0.0087671		PRCP	11q14	0.0234276
SLC16A3	17q25	0.0124159		RASSF5	1q32.1	0.0087956		ANP32B	9q22.32	0.0234335
SCML4	6q21	0.0124706		GPSM2	1p13.3	0.0088185		TNFRSF13C	22q13.1-q13.31	0.0234753
LRMP	12p12.1	0.0124775		MAB21L1	13q13	0.0088469		KLF10	8q22.2	0.023697
ZFP82	19q13.12	0.0125394		GPRC5A	12p13.1	0.0088783		LINC00537	9q21.11	0.0237741
STOML3	13q13.3	0.0126483		HDAC2	6q21	0.008922		NAGPA	16p13.3	0.0238922
SLC25A28	10q24.2	0.0126605		MATR3	5q31.2	0.0090282		CLASP2	3p22.3	0.0239183
COX5B	2q11.2	0.0127072		CASC10	10p12.31	0.0090794		LRCH3	3q29	0.023931
LPIN2	18p11.31	0.0127219		FBXL18	7p22.2	0.009127		CARD16	11q22	0.024019
GPRIN3	4q22.1	0.0128035		P2RY10	Xq21.1	0.0091571		DRP2	Xq22	0.0240543
PIP4K2A	10p12.2	0.0128127		INTS6	13q14.3	0.009171		ALKBH1	14q24.3	0.0240628
SIPA1L2	1q42.2	0.0128316		ERN1	17q24.2	0.0092233		E2F3	6p22	0.0240974
MEX3C	18q21.2	0.0128653		LY96	8q21.11	0.0092246		RGS13	1q31.2	0.024222
CLIP1	12q24.3	0.0128948		SH3BGRL	Xq13.3	0.0092392		HSPA6	1q23	0.0242377
LITAF	16p13.13	0.0128985		TMEM147-AS1	---	0.0092419		PSIP1	9p22.3	0.0243759
ATP11A-AS1	13q34	0.0129625		CD14	5q31.1	0.0093097		ZNF587	19q13.43	0.0245077
ZNF253	19p13.11	0.0129709		CD2BP2	16p11.2	0.0093107		NDUFA6	22q13.2	0.0246153
NAMPT	7q22.3	0.0129807		SYT7	11q12.2	0.0094119		FRMD4A	10p13	0.0246364
BAGE2	13cen	0.0131057		LINC00535	8q22.1	0.0094341		IFNAR1	21q22.11	0.0247782
TMCO5A	15q14	0.0131527		DAZAP2	12q12	0.009516		CSRP1	1q32	0.0248706
ITFG1	16q12.1	0.0131532		RAB3IP	12q15	0.0095575		AKAP17A	Xp22.33 and Yp11.32	0.0248765
FRYL	4p11	0.0131933		CARD16	11q22	0.0095648		TNRC6B	22q13.1	0.0248968
2018-09-06	Xq24	0.0133345		KLHL6	3q27.3	0.0095683		ATP5H	17q25	0.0250852
PRKAR1A	17q24.2	0.0136129		VAMP5	2p11.2	0.0096018		RAD54L2	3p21.2	0.0251097
ELAVL1	19p13.2	0.01364		POLR1B	2q13	0.0096407		SDF2	17q11.2	0.0251251
CD58	1p13	0.0137075		EIF2B2	14q24.3	0.009721		RGP1	9p13.3	0.0251698
CLTC	17q23.1	0.0137577		PIK3IP1	22q12.2	0.0098459		TROAP	12q13.12	0.0252351
CNPY1	7q36.3	0.0137788		IL2RB	22q13.1	0.0098691		AGT	1q42.2	0.025309
CYP2E1	10q26.3	0.0138007		MUT	6p12.3	0.0099253		F11-AS1	4q35.2	0.0253632
TFEC	7q31.2	0.0138178		TSC22D3	Xq22.3	0.0099801		C5orf28	5p12	0.0253802
TRMT44	4p16.1	0.0138545		STX8	17p12	0.009996		KIF23	15q23	0.0253991
ACLY	17q21.2	0.0138603		FLI1	11q24.1-q24.3	0.0100316		ENTHD1	22q13.1	0.0254056
ZMYM5	13q12	0.0139492		COL3A1	2q31	0.0100909		RFT1	3p21.1	0.0255648
CMTM4	16q21-q22.1	0.0139731		HIC2	22q11.21	0.0101135		MANBA	4q24	0.0256986
HELQ	4q21.23	0.0141083		THEMIS	6q22.33	0.0101771		SLC22A5	5q23.3	0.025909
SREK1	5q12.3	0.0142349		KDM4A	1p34.1	0.0102266		GAMT	19p13.3	0.0259139
TLK1	2q31.1	0.0142593		SCPEP1	17q22	0.01026		NPR2	9p21-p12	0.0259213
IL6ST	5q11.2	0.0142698		HIF1A	14q23.2	0.0102653		AACSP1	5q35.3	0.0260158
CNOT6L	4q13.3	0.0142797		TFAM	10q21	0.0103429		ATP6V1C1	8q22.3	0.026076
BLVRA	7p13	0.0143365		FILIP1L	3q12.1	0.010364		POLD2	7p13	0.0261527
PSAP	10q21-q22	0.0143504		WTAP	6q25-q27	0.0103859		ACAA1	3p22.2	0.0261668
ARMC8	3q22.3	0.0143628		CD86	3q21	0.0104532		RAC3	17q25.3	0.0262463
ICA1L	2q33.2	0.014365		LCP2	5q35.1	0.0105263		FNTB	14q23.3	0.0263866
DICER1-AS1	14q32.13	0.0143692		2018-09-06	Xq24	0.0105415		ZBTB26	9q33.2	0.026508
LINC01494	2q35	0.014409		LINC01492	9q31.1	0.0106068		IFT88	13q12.1	0.0266609
TFE3	Xp11.22	0.014583		GGPS1	1q43	0.0106398		EFS	14q11.2	0.0267295
LAMA3	18q11.2	0.0146019		KIAA0040	1q25.1	0.0106671		COX4I1	16q24.1	0.0267812
ZNF519	18p11.21	0.014683		LOC100507053	4q23	0.0107051		AFF2	Xq28	0.0268425
DIAPH1	5q31	0.0147098		TAB2	6q25.1	0.0107061		LOC105371622	---	0.0268789
CHDH	3p21.1	0.0147145		TNFRSF17	16p13.1	0.0107707		TEX10	9q31.1	0.0269631
CASP10	2q33-q34	0.0147388		ARSD	Xp22.3	0.0108539		NDUFA7	19p13.2	0.0270324
HLA-DPB1	6p21.3	0.0147417		ABCB4	7q21.1	0.0108715		LOC100131170	17q25.3	0.0270327
JAK1	1p32.3-p31.3	0.0148346		NME3	16q13.3	0.0108728		ANG	14q11.1-q11.2	0.0271304
LOC105373113	---	0.0148563		HSPA13	21q11	0.0108794		NDUFAF6	8q22.1	0.0271478
SRPR	11q24.2	0.0149097		CHD4	12p13	0.0109168		HS3ST3B1	17p12	0.0271558
LAPTM5	1p34	0.0149423		SCML4	6q21	0.010943		NBR1	17q21.31	0.0272638
ZNF41	Xp11.23	0.0149845		ALOX5AP	13q12	0.0109653		AKT1S1	19q13.33	0.0273456
SYCP1	1p13-p12	0.0149932		EAPP	14q13.1	0.0109744		CARD16	11q22	0.0275029
CLTA	9p13	0.0150082		EAF2	3q13.33	0.0110067		TXNL1	18q21.31	0.0275288
RREB1	6p25	0.0150379		IRF2	4q34.1-q35.1	0.0111026		G3BP1	5q33.1	0.0275349
LINC00691	3p24.2	0.0150555		GABRP	5q35.1	0.0111069		IDS	Xq28	0.0275415
AKR1C1	10p15-p14	0.0150853		CFI	4q25	0.0111169		RPS16	19q13.1	0.0276392
TRRAP	7q21.2-q22.1	0.0150976		CARD16	11q22	0.0111341		PRKX	Xp22.3	0.0279189
TNR	1q24	0.0151395		LAPTM5	1p34	0.01121		KPNA1	3q21	0.0279379
EEA1	12q22	0.0151886		PRKXP1	15q26.3	0.0113049		KLHL29	2p24.1	0.0280201
AMER2	13q12.13	0.0152171		TRDN	6q22.31	0.0113949		PDE8B	5q13.3	0.0280765
ZNF260	19q13.12	0.0152907		ESPL1	12q	0.011571		HSD17B6	12q13	0.0280874
DDX5	17q21	0.015407		SETBP1	18q21.1	0.011594		ATXN3	14q21	0.0281109
TBC1D12	10q23.33	0.0154348		2018-09-08	5q31	0.0115946		STX6	1q25.3	0.028121
TTLL3	3p25.3	0.015494		PSAP	10q21-q22	0.011689		SIKE1	1p13.2	0.0282891
2018-03-01	4q32.2	0.0154996		MAP3K8	10p11.23	0.0117032		ATP5J2	7q22.1	0.0283529
HNRNPLL	2p22.1	0.0156226		PTP4A1	6q12	0.011758		ETV4	17q21.31	0.0284501
CLEC4GP1	19p13.2	0.0157869		MINA	3q11.2	0.0117991		CKAP5	11p11.2	0.0285711
ITGA2B	17q21.32	0.015805		HEATR6	17q23.1	0.0119349		NDUFAF1	15q11.2-q21.3	0.0286223
ADARB1	21q22.3	0.0159339		CALM1	14q32.11	0.012015		LOC101928516	---	0.0286952
SLC25A36	3q23	0.015973		TRIM2	4q31.3	0.0120256		TK2	16q22-q23.1	0.0287337
PGAM1	10q25.3	0.0162241		LOC646762	7p14.3	0.0120345		FAM9B	Xp22.32	0.0287404
SPG11	15q14	0.0162291		BEST3	12q15	0.0120415		MCM3AP-AS1	21q22.3	0.0288147
CDK12	17q12	0.0162635		BRE	2p23.2	0.0120845		CTU2	16q24.3	0.0288998
STS	Xp22.32	0.0163444		DOPEY1	6q15	0.0121018		FAU	11q13	0.028955
RPS6KA2	6q27	0.0163929		SAE1	19q13.32	0.0121515		CRYBB1	22q12.1	0.029118
CLLU1	12q22	0.0164543		ZNF516	18q23	0.0121728		PLXNA1	3q21.3	0.0292582
CD44	11p13	0.0164932		RECQL5	17q25	0.0122022		PEX3	6q24.2	0.0293514
RASSF5	1q32.1	0.0165462		PSIP1	9p22.3	0.0122211		LOC151760	3q13.13	0.0295958
RHOG	11p15.5-p15.4	0.0165686		CD28	2q33	0.0122353		PDS5B	13q12.3	0.0296864
PPFIA1	11q13.3	0.0165948		SMG7	1q25	0.0122556		TMED1	19p13.2	0.0296876
PELO	5q11.2	0.01661		WNK2	9q22.3	0.0122723		AZIN1	8q22.3	0.0297186
RUFY2	10q21.3	0.0166596		CH17-408M7.1	1q21.1	0.01228		C15orf57	15q15.1	0.0297429
SEC14L1	17q25.2	0.0166702		GABRA1	5q34	0.0123095		EML4	2p21	0.029755
NIPSNAP1	22q12.2	0.0166958		ZBTB43	9q33.3	0.0123278		CNOT3	19q13.4	0.0298343
LOC101928298	10p14	0.0167158		ZCCHC7	9p13.2	0.0123314		ZBTB39	12q13.3	0.0299495
CDKAL1	6p22.3	0.016757		LCK	1p34.3	0.0123371		RNF6	13q12.2	0.0299735
MTF1	1p33	0.0167611		SF3B3	16q22.1	0.0123504		PCDH7	4p15	0.0299859
ACHE	7q22	0.0168064		UGCG	9q31	0.0124605		DIAPH3-AS1	---	0.0299997
FAR2	12p11.22	0.0168129		MROH2B	5p13.1	0.0124648		SLC16A7	12q13	0.0300535
STRADA	17q23.3	0.0168134		PPIB	15q21-q22	0.0125182		APOB	2p24-p23	0.0300777
LRRC3C	17q21.1	0.016897		CRTAM	11q24.1	0.0125202		DACT2	6q27	0.0301176
KLHL14	18q12.1	0.0169049		PLEKHO2	15q22.1	0.0125213		MAGEA2	Xq28	0.0301215
KATNBL1	15q14	0.0170447		TCEAL1	Xq22.1	0.0125717		SMAD4	18q21.1	0.0301289
HAVCR2	5q33.3	0.0170455		CD27	12p13	0.0125861		ICA1L	2q33.2	0.0301754
POU6F1	12q13.13	0.0170485		MLF1	3q25.1	0.0126047		MED14	Xp11.4	0.0301919
LOC219688	10p12.33	0.0170666		CSF1R	5q32	0.0126075		DGCR14	22q11.21|22q11.2	0.030332
SLC7A7	14q11.2	0.017084		STK17A	7p13	0.0126155		NBN	8q21	0.0303526
MTMR9	8p23-p22	0.0171719		RBFOX1	16p13.3	0.0126645		IL12RB1	19p13.1	0.0304596
ZDHHC18	1p36.11	0.0172439		TCOF1	5q32	0.0127559		PNLIPRP3	10q25.3	0.0304648
MAP2K1	15q22.1-q22.33	0.0174402		SH2B3	12q24	0.0128048		EPHB4	7q22	0.0304709
SOX13	1q32	0.0174797		AGTR1	3q24	0.0128183		AMPH	7p14-p13	0.0305325
LINC01492	9q31.1	0.0174801		NOP56	20p13	0.0128245		FAM13A	4q22.1	0.0305558
LOC646268	1q23.1	0.0175122		RNASE4	14q11	0.0128308		LOC105377371	---	0.0305754
PRKXP1	15q26.3	0.0175435		GAGE12B	Xp11	0.0128434		IGFBP7	4q12	0.0306773
HFE	6p21.3	0.0175594		DTYMK	2q37.3	0.0129038		MATN2	8q22	0.0307217
SPINK1	5q32	0.0175923		GRIN2D	19q13.33	0.0129203		MYBL2	20q13.1	0.0307225
LAPTM4B	8q22.1	0.0176564		RPS8	1p34.1-p32	0.0130084		RNF126	19p13.3	0.0308165
ENTPD3	3p21.3	0.0176789		HFE	6p21.3	0.0130941		ELAVL1	19p13.2	0.0308274
EBF2	8p21.2	0.0177141		SYTL3	6q25.3	0.0131384		ENOX2	Xq25	0.0308871
NME2	17q21.3	0.0177173		USP49	6p21	0.0132149		ZMYM3	Xq13.1	0.0309161
C20orf202	20p13	0.0177533		RAD54L	1p32	0.0132538		NAGA	22q11	0.0311177
MAPKAPK2	1q32	0.0178015		HSPBP1	19q13.42	0.0133057		BRD3	9q34	0.0311224
PDE5A	4q27	0.0178298		ABCA1	9q31.1	0.0133483		KIAA0754	1p32-p31	0.0311788
ARHGAP26	5q31	0.017873		CPA3	3q24	0.0133605		RAB30	11q14.1	0.0313054
ITGB2	21q22.3	0.0179257		NR3C1	5q31.3	0.013374		L3MBTL1	20q13.12	0.0313108
COPS8	2q37.3	0.017932		GRAMD4	22q13.31	0.0133748		CPSF4	7q22.1	0.0313189
MIA3	1q41	0.0179536		ELK3	12q23	0.0134894		SLC35A3	1p21	0.0313802
CNST	1q44	0.0181046		HLA-DRB1	6p21.3	0.0135777		C11orf54	11q21	0.0314676
HERC3	4q21	0.0181063		MED6	14q24.2	0.0136391		TPD52L1	6q22-q23	0.0314988
GCC2	2q12.3	0.0181111		SUCLA2	13q14.2	0.0136474		CD36	7q11.2	0.0315219
MYCNOS	2p24.1	0.0181707		GJD3	17q21.2	0.0136619		ZNF777	7q36.1	0.0318406
A2M	12p13.31	0.0181885		CHPT1	12q	0.0137095		UQCRB	8q22	0.031842
HIP1	7q11.23	0.0181964		DUOX1	15q15.3	0.0137163		KY	3q22.2	0.0319394
RAP1A	1p13.3	0.0182247		P2RX7	12q24	0.0137678		RBM26-AS1	---	0.0319769
METAP1D	2q31.1	0.0182481		PTP4A3	8q24.3	0.0138608		KALRN	3q21.2	0.0320051
TBC1D32	6q22.31	0.0182587		CKAP5	11p11.2	0.0138755		LOC101927348	16p13.12	0.0320441
ITPR1	3p26.1	0.0183749		PDHA1	Xp22.1	0.0139274		WDR77	1p13.2	0.0320731
PTPN12	7q11.23	0.0184055		LOC727916	6q12	0.0139327		ZC3H7B	22q13.2	0.0321002
TSC22D3	Xq22.3	0.0184066		GNL2	1p34.3	0.0139803		PIK3IP1	22q12.2	0.032111
FOXK2	17q25	0.0184275		IL16	15q26.3	0.014104		EEF1D	8q24.3	0.0322816
DAOA	13q33.2|13q34	0.0184489		LAMP2	Xq24	0.0141278		CALY	10q26.3	0.0323002
STK10	5q35.1	0.0184515		KRTAP2-3	17q21.2	0.0141928		ENC1	5q13	0.032323
KMT2C	7q36.1	0.0185183		RHOBTB3	5q15	0.0141953		MRAS	3q22.3	0.0325115
GUSB	7q21.11	0.0185387		PCBP1-AS1	2p14	0.0142024		PIAS2	18q21.1	0.0326712
CPM	12q14.3	0.0185474		DCAF5	14q23-q24.1	0.0142309		EAF2	3q13.33	0.0328329
F5	1q23	0.0185641		TNFAIP3	6q23	0.0142838		VTI1A	10q25.2	0.0328847
CACNA1D	3p14.3	0.0186208		ADD2	2p13.3	0.0143025		KCNE4	2q36.1	0.0328893
KIAA1109	4q27	0.0186348		PSEN1	14q24.3	0.0143212		ATOH7	10q21.3|10q21.3-q22.1	0.0332601
IPO5P1	19p12	0.01869		ACP5	19p13.2	0.0143787		NKTR	3p22.1	0.0332653
TAB3	Xp21.2	0.0187082		ALDH6A1	14q24.3	0.0145526		HOPX	4q12	0.0332655
L3MBTL1	20q13.12	0.0187161		CD48	1q21.3-q22	0.0145965		FANCA	16q24.3	0.0332975
PROSER2-AS1	10p14	0.0187406		IL10RA	11q23	0.0146562		TPST2	22q12.1	0.0333959
SKAP2	7p15.2	0.0188163		FUCA1	1p34	0.0147308		CNNM2	10q24.32	0.0337406
IFITM10	11p15.5	0.0188571		OR10D3	11q24.2	0.0147789		VAV2	9q34.1	0.0338711
YIF1B	19q13.2	0.0188694		CTBP2	10q26.13	0.0148132		ATXN1	6p23	0.0338951
PTP4A3	8q24.3	0.0189743		INTS4	11q14.1	0.0148757		STK17A	7p13	0.0339053
YLPM1	14q24.3	0.0190296		PELO	5q11.2	0.0149077		RARG	12q13	0.0339355
EIF4E	4q23	0.0191142		TOP1MT	8q24.3	0.014978		SLC25A36	3q23	0.0340226
PTMA	9q22.32	0.0191326		RAP1B	12q14	0.0150175		CTNNA3	10q22.2	0.0341452
STAMBP	2p13.1	0.0191569		SPCS2	11q13.4	0.0151203		ANKRD28	3p25.1	0.0342465
KLK11	19q13.33	0.0191617		SARAF	8p12	0.0152816		PIGX	3q29	0.0342465
CATSPER2	15q15.3	0.0191704		UNC50	2q11.2	0.0153007		ABCG1	21q22.3	0.0342896
PSAPL1	4p16.1	0.0192076		MPP1	Xq28	0.0153621		PPP2R3C	14q13.2	0.0343981
TRIM3	11p15.5	0.0192896		IGSF6	16p12.2	0.0153678		HMGA1	6p21	0.0344343
ELF3	1q32.2	0.0193343		ANKS6	9q22.33	0.0153942		TFF3	21q22.3	0.0344674
GNB5	15q21.2	0.0193403		KCNE4	2q36.1	0.0155162		AIG1	6q24.2	0.0345027
FCHO2	5q13.2	0.019386		MLX	17q21.1	0.0155507		WNK3	Xp11.22	0.0345655
SHC3	9q22.1	0.0193882		NDUFB8	10q24.31	0.0155544		BRD4	19p13.1	0.0348559
TERF1	8q21.11	0.0194342		JRK	8q24.3	0.0156981		BIVM	13q33.1	0.0350138
CEP350	1q25.2	0.0194347		LOC105371232	---	0.015737		NR0B2	1p36.1	0.0350308
TIPRL	1q23.2	0.0194426		SLC6A8	Xq28	0.0158106		BATF	14q24.3	0.0350347
FLT3LG	19q13.3	0.0195587		AMPD1	1p13	0.015856		ZNF506	19p13.11	0.0353192
MAGI1-IT1	3p14.3	0.0197377		XKR6	8p23.1	0.0158586		COL1A2	7q22.1	0.0354317
MIOS	7p21.3	0.0197499		ACADM	1p31	0.0160121		DGKE	17q22	0.0354383
EBNA1BP2	1p35-p33	0.0198444		RAB33A	Xq26.1	0.0160304		TAGLN	11q23.2	0.0354956
CD276	15q23-q24	0.0198445		CXCL6	4q13.3	0.0160883		UBR4	1p36.13	0.0357012
MOCS3	20q13.13	0.0199245		ATG2B	14q32.2	0.0161308		ZFYVE9	1p32.3	0.0357445
NETO1	18q22.2	0.0199468		RCBTB2	13q14.3	0.0161413		SPECC1L-ADORA2A	22q11.23	0.0358396
CAPRIN1	11p13	0.019978		CBFA2T2	20q11	0.0161556		WNT11	11q13.5	0.0359167
ZBED3-AS1	5q13.3	0.0200132		GAP43	3q13.31	0.0162072		PCOLCE	7q22	0.0359514
PQLC2L	3q25.32	0.0200156		INPP5D	2q37.1	0.0162182		GPR137B	1q42-q43	0.0359778
NFE2L2	2q31	0.0200707		FBLN1	22q13.31	0.0162566		TRAPPC13	5q12.3	0.0362606
RBM5	3p21.3	0.0200719		PITPNC1	17q24.2	0.0162706		TEX9	15q21.3	0.0363801
PUDP	Xp22.32	0.0201238		GRID1	10q22	0.0162899		ALDH1A3	15q26.3	0.0363936
PTPN18	2q21.1	0.0201803		BATF	14q24.3	0.0163173		ARHGEF10L	1p36.13	0.036401
NKX2-2	20p11.22	0.0202319		ZNF131	5p12	0.0163314		KIAA1211	4q12	0.0364895
RAD1	5p13.2	0.0202864		AGO2	8q24	0.0163799		TNFAIP6	2q23.3	0.0364994
GALNT3	2q24-q31	0.0203799		ZNF519	18p11.21	0.0164029		PAX9	14q13.3	0.0366372
LOC101929964	---	0.0204515		SOX12	20p13	0.016443		GADD45A	1p31.2	0.0366631
ACVR2B	3p22	0.0204765		SMPDL3A	6q22.31	0.0166058		DTYMK	2q37.3	0.0366809
AFF3	2q11.2-q12	0.0205415		DHX9	1q25	0.016651		IGF1R	15q26.3	0.0367696
ADAMTSL1	9p21.3	0.0206011		LEPR	1p31	0.016673		CDK9	9q34.1	0.036784
LOC645513	4q26	0.0206273		CLTC	17q23.1	0.0166793		LOC284930	22q13.32	0.0368047
CXCR6	3p21	0.0206327		MYC	8q24.21	0.016681		MED25	19q13.3	0.0368495
CALCOCO2	17q21.32	0.0206617		HNMT	2q22.1	0.016692		YY1	14q	0.0369476
ZNF292	6q14.3	0.0206666		NAGPA	16p13.3	0.0168039		KDELR1	19q13.3	0.0369859
ATP6V0D2	---	0.0206993		LACTB	15q22.1	0.0168668		LOC283435	12q24.32	0.0370535
WASH1	9p24.3	0.0207084		SLC22A7	6p21.1	0.0168945		DISC1	1q42.1	0.0370786
RPS29	14q	0.0207106		ZNF260	19q13.12	0.0170539		SLC25A25-AS1	9q34.11	0.0370902
NLRP1	17p13.2	0.0208513		IGF1R	15q26.3	0.0170643		SNHG4	5q31.2	0.0371145
EPHA7	6q16.1	0.0208802		ABAT	16p13.2	0.0171414		CSNK1G2-AS1	19p13.3	0.0371316
FAM98B	15q14	0.0208852		LOC286359	9q22.33	0.0171855		PSMC1	14q32.11	0.0371581
FABP6	5q33.3-q34	0.020908		FYB	5p13.1	0.0171951		MTF1	1p33	0.0372926
SLC25A45	11q13.1	0.0209388		CXCR6	3p21	0.0172342		ABCB4	7q21.1	0.0373782
SDS	12q24.13	0.0209609		TPH1	11p15.3-p14	0.0172525		SMC2	9q31.1	0.0377062
ZNF263	16p13.3	0.0209868		SEC23A	14q21.1	0.0172813		GPR12	13q12	0.0377477
DHX34	19q13.3	0.0210052		POSTN	13q13.3	0.0173336		ERGIC3	20pter-q12	0.0377493
FRMD4A	10p13	0.0210632		NQO2	6p25.2	0.0173638		SLC12A1	15q15-q21.1	0.0378415
C8orf59	8q21.2	0.0210764		BTBD9	6p21	0.0173943		FIGNL1	7p12.1	0.0378487
ELMO1	7p14.1	0.0210969		PRAME	22q11.22	0.0174208		POM121L9P	22q11.23	0.0379748
WAPL	10q23.2	0.021203		ERCC6L2	9q22.32	0.0174751		ZFYVE16	5q14	0.038117
LOC101929759	---	0.0212674		KLF14	7q32.3	0.0174911		MUCL1	12q	0.0382451
GAS2	11p14.3	0.0212706		MICAL2	11p15.3	0.0175134		GTF2I	7q11.23	0.0382704
CNTFR-AS1	9p13	0.0212991		SP100	2q37.1	0.0175391		ARHGAP35	19q13.3	0.0384976
CPT1A	11q13.2	0.0213115		TACC1	8p11.22	0.0175617		DNASE1	16p13.3	0.0386028
OSER1-AS1	---	0.0214675		PPP2R3C	14q13.2	0.0175634		BTN2A2	6p22.1	0.0387067
LINC01395	11q24.3	0.0215324		MMP2	16q12.2	0.017586		MAP3K13	3q27	0.0387691
TRAPPC3	1p34.3	0.0215432		BECN1	17q21	0.0175991		NOLC1	10q24.32	0.0388911
FAM9B	Xp22.32	0.0215767		TDH	8p23.1	0.0176256		KDM3B	5q31	0.0389313
LRRC27	10q26.3	0.0216189		DIXDC1	11q23.1	0.0176903		RABAC1	19q13.2	0.0389984
NAP1L1	12q21.2	0.0216221		PAX2	10q24	0.01773		SMARCC2	12q13.2	0.0390655
MAN2C1	15q24.2	0.0216555		SLFN5	17q12	0.0178038		LASP1	17q11-q21.3	0.0391458
CYP3A5	7q21.1	0.0217307		UEVLD	11p15.1	0.0178422		LOC283484	13q33.3	0.0391659
SNTB2	16q22.1	0.0218353		KIF6	6p21.2	0.0179012		HS6ST3	13q32.1	0.039179
LOC101927876	1p36.13	0.0218421		AKT2	19q13.1-q13.2	0.0179871		KDM4A	1p34.1	0.0392497
LACTB	15q22.1	0.0218786		CCDC14	3q21.1	0.0179941		DCTN1	2p13	0.0392857
AP3S1	5q22	0.0218814		MCTP1	5q15	0.018002		CA12	15q22	0.039356
ACP2	11p11.2|11p12-p11	0.0218918		PECAM1	17q23.3	0.0180206		CCR2	3p21.31	0.0393945
LOC101928307	6q12	0.02191		COL27A1	9q32	0.0180625		LHX2	9q33.3	0.0394507
ATM	11q22-q23	0.0219217		LRRFIP1	2q37.3	0.0180832		GSTT1	22q11.23	0.0394817
C22orf31	22q12.1	0.0219684		CEACAM1	19q13.2	0.0180909		PAGE4	Xp11.23	0.0394911
APC	5q21-q22	0.0220048		WBP4	13q14.11	0.0180913		SLC39A6	18q12.2	0.0395655
ZFP37	9q32	0.0220421		ZNF248	10p11.2	0.018108		ELK4	1q32	0.0396389
FLI1	11q24.1-q24.3	0.0220671		FGL2	7q11.23	0.0181141		RPL27A	11p15	0.0400512
TFAM	10q21	0.0220916		LOC284242	18q12.1	0.018172		RAB14	9q33.2	0.0401812
MARCKS	6q22.2	0.0221069		AKAP11	13q14.11	0.0182031		LOC284513	1p36.13	0.0402333
ALDH3B2	11q13	0.022177		F3	1p22-p21	0.0183054		UGGT2	13q32.1	0.0403037
FAM69A	1p22.1	0.0221801		SERPINF1	17p13.3	0.0183381		HYDIN	16q22.2	0.040341
NADSYN1	11q13.4	0.022247		HHEX	10q23.33	0.0183604		GNA11	19p13.3	0.0403513
KLC4	6p21.1	0.022256		RAB30	11q14.1	0.0183842		SEPSECS-AS1	4p15.31	0.0406301
RMST	12q23.1|12q21	0.0222804		RGP1	9p13.3	0.0184789		TCEB2	16p12.3	0.0407054
ATG12	5q21-q22	0.0223342		ARHGAP25	2p13.3	0.0185455		EDN1	6p24.1	0.0409038
SYNRG	17q12	0.0223409		CPE	4q32.3	0.0186272		HSPA13	21q11	0.041006
GATA2-AS1	3q21.3	0.0223502		FBLIM1	1p36.21	0.018653		LMF1	16p13.3	0.0410598
LINC01547	21q22.3	0.0223796		SDS	12q24.13	0.0186643		IPO5P1	19p12	0.04114
EPAS1	2p21-p16	0.0223952		ZNF74	22q11.21	0.0187431		LEPROT	1p31.3	0.0412015
CAPZB	1p36.1	0.0224001		WBP1L	10q24.32	0.0188207		MEG3	14q32	0.0412166
DOCK2	5q35.1	0.0225963		TMED5	1p22.1	0.0188299		CUL5	11q22.3	0.0412381
SCAMP1	5q14.1	0.022648		CLU	8p21-p12	0.0188862		GRP	18q21.1-q21.32	0.0412415
GNS	12q14	0.0226772		GFOD1	6pter-p22.1	0.0189347		PLXNC1	12q23.3	0.0412629
SF3B3	16q22.1	0.0228017		SKP2	5p13	0.018948		PDPN	1p36.21	0.0414138
LOC283516	13q14.11	0.0228172		NLRC4	2p22.3	0.018984		ALKBH5	17p11.2|17p11.2	0.0414346
IRF2	4q34.1-q35.1	0.0228433		PEX12	17q12	0.0190045		MLX	17q21.1	0.0414695
CSF1R	5q32	0.0228557		GAPT	5q11.2	0.0190572		MRE11A	11q21	0.0415925
NFX1	9p13.3	0.0229007		MGC16275	17q25.1	0.0191078		SOX3	Xq27.1	0.0416455
CDYL	6p25.1	0.0229433		DIP2B	12q13.12	0.0191553		TREML4	6p21.1	0.0416716
CD4	12p13.31	0.0229674		MAP4	3p21	0.0191731		CLSPN	1p34.2	0.0417048
ATP8A1	4p13	0.0229973		CDC25A	3p21	0.0191782		POLR2D	2q21	0.0419133
ANK2	4q25-q27	0.0231292		PWP1	12q23.3	0.0191961		CACNA1H	16p13.3	0.0420335
EXD1	15q15.1	0.0231297		SUN1	7p22.3	0.0192253		INPP5K	17p13.3	0.0422297
LOC100132077	9q22.32	0.0231847		HOXD9	2q31.1	0.0192337		RAPH1	2q33	0.0425447
ZBED1	Xp22.33;Yp11	0.023213		SHISA9	16p13.12	0.0192401		UBL3	13q12-q13	0.0425462
ARSK	5q15	0.0232195		KLHL34	Xp22.12	0.0193881		C12orf76	12q24.11	0.0427065
LOC105376323	---	0.0234094		CD19	16p11.2	0.0194009		CPM	12q14.3	0.042715
FOXF2	6p25.3	0.0234378		SLC19A1	21q22.3	0.0194472		LOC101928700	---	0.0427276
C5orf28	5p12	0.0234546		DGKE	17q22	0.0194987		PDE4D	5q12	0.0428299
CTU2	16q24.3	0.0234581		GIMAP1	7q36.1	0.0195428		CYB5B	16q22.1	0.0429931
CRISPLD2	16q24.1	0.0234746		F13A1	6p25.3-p24.3	0.0195824		NFYC	1p32	0.0430647
LPAR1	9q31.3	0.023503		C11orf31	11q12.1	0.019601		ZNF101	19p13.11	0.0431417
SLC9B2	4q24	0.0235169		CD33	19q13.3	0.0196058		BAZ2A	12q13.3	0.0432001
PPP2R5C	14q32.31	0.0235389		ASNA1	19q13.3	0.0196243		PIP4K2B	17q12	0.0432672
STK3	8q22.2	0.023599		C11orf21	11p15.5	0.0196633		CEP57	11q21	0.0432806
EXOSC1	10q24	0.0236398		GZMA	5q11-q12	0.0196895		FSTL3	19p13	0.0434123
CAP1	1p34.2	0.0236415		QKI	6q26	0.0196988		IL6ST	5q11.2	0.0434321
IGSF6	16p12.2	0.0236556		PCSK6	15q26.3	0.0197193		GUK1	1q32-q41	0.0435142
PRPF19	11q12.2	0.0236767		RAB32	6q24.3	0.0198062		DMRTC1	Xq13.2	0.0435758
KPNA4	3q25.33	0.0237493		PRR26	10p15.3	0.0198379		UEVLD	11p15.1	0.0435899
DIXDC1	11q23.1	0.0237776		COPS2	15q21.2	0.0198521		BCL9	1q21	0.0436605
SNORA74A	5q31.2	0.0237785		ATOH7	10q21.3|10q21.3-q22.1	0.0198558		HGD	3q13.33	0.0436635
WAS	Xp11.4-p11.21	0.0238263		HECTD2	10q23.32	0.0199477		SRSF7	2p22.1	0.0436665
CELF1	11p11	0.0238367		YTHDC2	5q22.2	0.0199756		BAG5	14q32.33	0.0436858
LOC100130278	3p21.31	0.023886		RUFY2	10q21.3	0.020021		LOC647323	3q29	0.0437182
TSPAN3	15q24.3	0.0238883		TRIM73	7q11.23	0.0201446		CTBP2	10q26.13	0.0438775
GHITM	10q23.1	0.0239023		HDGF	1q23.1	0.0201636		CCDC91	12p11.22	0.0438959
KRT15	17q21.2	0.0240034		GIGYF2	2q37.1	0.0201693		BLVRA	7p13	0.043992
STRN	2p22.2	0.0240191		GPRASP1	Xq22.1	0.0202035		ENPP1	6q22-q23	0.0440063
CUX1	7q22.1	0.0240233		CEBPG	19q13.11	0.0202233		BCL11A	2p16.1	0.044034
CCR1	3p21	0.024111		SUOX	12q13.2	0.0202347		LOC400940	2p25.2	0.0440406
ST7-AS2	7q31.2	0.0241526		2018-03-02	1q41	0.0202366		LAMP2	Xq24	0.0441842
CSNK1E	22q13.1	0.0242019		PNOC	8p21	0.0202401		FOSL2	2p23.3	0.0443176
SH3GL1	19p13.3	0.0242106		ETV3	1q21-q23	0.0202706		CDH24	14q11.2	0.0443432
ZNF165	6p21.3	0.0242893		LINC00665	19q13.12	0.0203516		BPNT1	1q41	0.0443614
CSF1	1p13.3	0.024368		PPARGC1B	5q32	0.0203669		LOC105375531	---	0.0443646
SCAF8	6q25.1-q25.3	0.0243708		DFNA5	7p15	0.0203899		TMEM11	17p11.2	0.0444582
MAST4	5q12.3	0.0243777		GNB2L1	5q35.3	0.0204148		LOC142937	10p15.1	0.0444735
CA8	8q12.1	0.0244566		IKZF2	2q34	0.0205118		CRISPLD2	16q24.1	0.0447395
ZBTB5	9p13.2	0.0248002		REST	4q12	0.0205253		ZNF280D	15q21.3	0.044774
CD163	12p13.3	0.02487		TRAM1	8q13.3	0.0205831		DLGAP4	20q11.23	0.0450585
ZBTB44	11q24.3	0.0249494		TOMM40	19q13	0.0206233		VRK3	19q13	0.0451579
RARG	12q13	0.0249794		ALDH1A3	15q26.3	0.0206926		ACSM3	16p13.11	0.0453142
FCRL5	1q21	0.024988		CNOT6L	4q13.3	0.0207061		DUSP16	12p13	0.0454412
ATP1A1-AS1	1p13.1	0.0249967		SCARB2	4q21.1	0.0207094		TOR1AIP2	1q25.2	0.0454573
HES1	3q28-q29	0.0250239		ZEB2	2q22.3	0.0208065		PSEN1	14q24.3	0.0454749
NOL3	16q22.1	0.0250282		FMO4	1q24.3	0.0208171		EFEMP2	11q13.1	0.0454753
NREP	5q22.1	0.0250579		ZNF441	19p13.2	0.0208352		FAS	10q24.1	0.0455815
OAS1	12q24.2	0.0250816		MYCNOS	2p24.1	0.0208816		RAB7A	3q21.3	0.0457259
NFYC	1p32	0.0250897		CTH	1p31.1	0.0209173		LOC105370945	---	0.0457669
TMEM182	2q12.1	0.0251297		FUT8	14q24.3	0.0211578		MPHOSPH9	12q24.31	0.0458356
CORO2A	9q22.3	0.0251889		ARCN1	11q23.3	0.0211813		KRT78	12q13.13	0.0458979
OVOL2	20p11.23	0.0252212		ACSM3	16p13.11	0.0212088		MAGEC1	Xq26	0.0459816
KAT6B	10q22.2	0.0252657		CCR5	3p21.31	0.0212221		FADS2	11q12.2	0.0460356
ASB16-AS1	17q21.31	0.0253223		LRP8	1p34	0.0212331		KMT2B	19q13.1	0.0460644
ABI3BP	3q12	0.0254032		PJA2	5q21.3	0.0213395		SULT1A1	16p12.1	0.0462522
ZNF740	12q13.13	0.0254502		ITGAX	16p11.2	0.0213413		NOP9	14q12	0.0462904
SPIRE2	16q24	0.025457		RAB3GAP2	1q41	0.0213438		RPS21	20q13.3	0.0464031
KLHL6	3q27.3	0.0255022		RAD1	5p13.2	0.0213637		UACA	15q22-q24	0.0465404
LOC284898	22q12.1	0.0255707		ZNF101	19p13.11	0.0214042		RDH13	19q13.42	0.0466128
PAK2	3q29	0.0256332		ADGRE5	19p13.12	0.0214043		RORA-AS1	15q22.2	0.0466562
CIRBP-AS1	19p13.3	0.0256487		PRR5L	11p13-p12	0.0215348		LOC101929964	---	0.0467048
ZNF7	8q24	0.0256825		MYL5	4p16.3	0.0216048		SLC31A2	9q32	0.0467052
GAFA2	16q23.2	0.0257282		GZMK	5q11.2	0.0218251		ARHGAP11B	15q13.2	0.0467362
DEFB119	20q11.21	0.0257322		SLC35A3	1p21	0.0218275		SLC16A4	1p13.3	0.0467691
CYP2U1	4q25	0.0258762		TIMP3	22q12.3	0.0219037		ERC1	12p13.3	0.0467942
LOC101929694	---	0.0259427		PTCD2	5q13.2	0.0221181		SSH1	12q24.11	0.0468583
ENPP4	6p21.1	0.0260509		MS4A4A	11q12	0.0221326		SMARCD3	7q35-q36	0.0468638
LOC101928449	---	0.0260759		RUNX1T1	8q22	0.0221673		LOC102724814	14q11.2	0.0469348
TPH1	11p15.3-p14	0.0261049		TIMP2	17q25	0.0222198		LOC102546294	5q32	0.0469644
SLC4A5	2p13	0.0261339		ABLIM3	5q32	0.0222875		KLRC1	12p13	0.0470691
SH3PXD2B	5q35.1	0.0261372		MLH1	3p21.3	0.0223363		TIMP2	17q25	0.0471804
CYBB	Xp21.1	0.0261962		SRGN	10q22.1	0.0223601		TFIP11	22q12.1	0.0472616
LINC00520	14q22.3	0.0262228		NR1H3	11p11.2	0.0223791		COX10-AS1	---	0.0472782
DZIP1	13q32.1	0.0262525		ATL2	2p22.3	0.0224425		WNK2	9q22.3	0.0473845
LOC101929210	4q22	0.0264145		SLC39A6	18q12.2	0.0224822		LETM2	8p11.23	0.0474242
SETX	9q34.13	0.0264381		PRKAR1A	17q24.2	0.0225138		PRKX	Xp22.3	0.0474399
TLR2	4q32	0.0264503		RAB14	9q33.2	0.0225706		GSTM2	1p13.3	0.0475678
PTPRB	12q15-q21	0.0265617		EHD4	15q11.1	0.0225952		LSMEM1	7q31.1	0.0476185
VPS13D	1p36.22	0.0266111		JAK2	9p24	0.022632		DCAF8	1q22-q23	0.0476352
NAGA	22q11	0.0266482		ARHGEF10L	1p36.13	0.022633		TNFSF9	19p13.3	0.0476895
NSF	17q21	0.0266963		ANP32A	15q23	0.0226754		NRAS	1p13.2	0.0477662
LCP2	5q35.1	0.0267342		GPX1	3p21.3	0.0227852		TET3	2p13.1	0.0477872
ST6GALNAC5	1p31.1	0.0268459		SAP30	4q34.1	0.0228123		ADGRA3	4p15.2	0.0478197
LINC01268	6q21	0.0268468		IVD	15q14-q15	0.0228222		COX5A	15q24.1	0.0478325
MORF4L2-AS1	Xq22.2	0.0269065		FSTL3	19p13	0.0228339		JTB	1q21	0.0478636
SRSF5	14q24	0.0269339		F2R	5q13	0.0228811		KITLG	12q22	0.0480182
PLCB4	20p12	0.0270171		PPRC1	10q24.32	0.0228932		IL4R	16p12.1-p11.2	0.0480495
TAF2	8q24.12	0.0270282		CD52	1p36	0.0229182		GATA4	8p23.1-p22	0.048072
DAAM1	14q23.1	0.0270293		OSTF1	9q13-q21.2	0.0229773		ENOSF1	18p11.32	0.0480768
LOC340017	4q32.1	0.0270945		TK2	16q22-q23.1	0.0230319		ADRBK1	11q13.1	0.0481084
CCT2	12q15	0.0270962		PDE4D	5q12	0.0231223		SDHB	1p36.1-p35	0.0481152
LOC285627	5q33.3	0.0271126		ATP10A	15q11.2	0.0231396		TTC39C	18q11.2	0.0481253
LINC00299	2p25.1	0.0271126		ILK	11p15.4	0.0231843		DHX34	19q13.3	0.0481645
GGNBP2	17q12	0.027151		RBBP6	16p12.2	0.0231968		SFSWAP	12q24.33	0.048245
COL16A1	1p35-p34	0.0271754		LIPC	15q21-q23	0.0232264		FCRL2	1q21	0.0484484
MED13	17q22-q23	0.027235		SOGA3	6q22.33	0.023285		TFAP2A-AS1	6p24.3	0.0486018
RGS5	1q23.1	0.0272378		ANP32B	9q22.32	0.0232863		BRWD1	21q22.2	0.0486092
CEP72	5p15.33	0.0272767		RPL7	8q21.11	0.0233277		CEACAM1	19q13.2	0.0486711
RPL8	8q24.3	0.027341		CCDC169	13q13.3	0.0233405		NOL3	16q22.1	0.0487739
MYO10	5p15.1	0.02747		PTPRB	12q15-q21	0.0233482		DHX9	1q25	0.048829
OSTF1	9q13-q21.2	0.0274857		XCL1	1q23	0.0233491		BICD1	12p11.2-p11.1	0.0488432
LINC01016	---	0.0275448		SPARC	5q31.3-q32	0.0233788		GULP1	2q32.3-q33	0.0491159
ZNF426	19p13.2	0.0275898		PTCHD1	Xp22.11	0.0233945		FAR1	11p15.2	0.0491451
EFNB2	13q33	0.0279114		ADCY7	16q12.1	0.0234332		TGFBR1	9q22	0.0491498
LOC100507053	4q23	0.0279606		MAF	16q22-q23	0.0234597		CBL	11q23.3	0.0492437
LCT	2q21	0.0279813		SP140L	2q37.1	0.0234688		SPCS2	11q13.4	0.0493271
MYH8	17p13.1	0.0280121		CMAHP	6p21.32	0.0236424		COX5B	2q11.2	0.0493405
GYPE	4q31.1	0.0280163		PLEKHB2	2q21.1	0.0236828		MCM8-AS1	---	0.049383
DNAJC14	12q13.2	0.0280922		SPARCL1	4q22.1	0.0236866		ADORA1	1q32.1	0.0493986
IMPG1	6q14.2-q15	0.0281532		RPL27A	11p15	0.023757		OXTR	3p25	0.0496375
PIK3R6	17p13.1	0.0282626		SLC25A27	6p12.3	0.0237604		GBE1	3p12.3	0.0496516
RB1CC1	8q11	0.028288		CEP89	19q13.11	0.0238031		MIPOL1	14q13.3	0.0498432
LOC283140	11q23.1	0.0282917		OVOL2	20p11.23	0.0238059		GPRIN3	4q22.1	0.0499394
ABHD1	2p23.3	0.0282924		PRKACB	1p31.1	0.023838
RGS13	1q31.2	0.0283043		PSMC1	14q32.11	0.0238801
ZDHHC14	6q25.3	0.0283342		P2RX4	12q24.32	0.023893
YTHDC2	5q22.2	0.0283612		PURA	5q31	0.0239502
SLC1A1	9p24	0.0283767		PRCP	11q14	0.0239723
SH3GL3	15q24	0.0284167		GMFG	19q13.2	0.0241101
ASL	7q11.21	0.0285036		RCC1	1p36.1	0.0241123
NFRKB	11q24-q25	0.0286118		WHAMMP2	15q11.2	0.024125
PDE4A	19p13.2	0.0287357		KLRC1	12p13	0.0241574
ITPR3	6p21	0.0287446		FRRS1L	9q31	0.0241922
LINC01197	15q26.2	0.028769		SLC25A13	7q21.3	0.024327
PLCL1	2q33	0.0287706		LOC101929073	10p12.1	0.0243739
WDR49	3q26.1	0.0288091		C11orf87	11q22.3	0.0244214
ZNF831	20q13.32	0.0289179		MTMR9	8p23-p22	0.024433
ADGRG4	Xq26.3	0.0289558		GCH1	14q22.1-q22.2	0.024498
PHF20L1	8q24.22	0.0289721		LOC642852	21q22.3	0.0245469
TAGAP	6q25.3	0.0290145		FCGR3A	1q23	0.0245565
SH2B3	12q24	0.0290175		NBPF9	1q21.2	0.0245629
DDX3Y	Yq11	0.0290286		HLA-DOA	6p21.3	0.0245922
NPFF	12q13.13	0.0290447		AMER1	Xq11.2	0.0245944
SKP1	5q31	0.0291642		MON1B	16q23.1	0.0247297
TERT	5p15.33	0.0291865		LPAR1	9q31.3	0.0247395
TIA1	2p13	0.0292059		MGST1	12p12.3-p12.1	0.0247556
LTBR	12p13	0.029295		CEACAM6	19q13.2	0.0248355
GAA	17q25.2-q25.3	0.0293402		SIGLEC6	19q13.3	0.0249432
LOC101928182	---	0.0294014		POLK	5q13	0.0249487
WNT2B	1p13	0.0294371		SNX4	3q21.2	0.0249514
HHEX	10q23.33	0.0294713		CNN1	19p13.2-p13.1	0.0249999
BRD4	19p13.1	0.0295153		RB1	13q14.2	0.0250392
RHBDL2	1p34.3	0.0295258		CD74	5q32	0.0251164
USP49	6p21	0.0295275		FILIP1	6q14.1	0.025124
ZNF85	19p12	0.0297011		ANKLE1	19p13.11	0.0251297
PLXND1	3q22.1	0.029732		ANTXR2	4q21.21	0.0251488
SP2	17q21.32	0.0297561		VAV1	19p13.3	0.0252015
IPP	1p34-p32	0.0297997		2018-03-01	4q32.2	0.0252221
HSD17B12	11p11.2	0.0298126		CD79A	19q13.2	0.025237
C3orf62	3p21.31	0.029821		GCC2	2q12.3	0.0253739
RUBCN	3q29	0.0298845		HEPH	Xq11-q12	0.0254169
AKR1A1	1p33-p32	0.0299091		LACC1	13q14.11	0.025428
NBAS	2p24	0.0299527		L3MBTL4	18p11.31	0.0254386
MGC16275	17q25.1	0.0300033		HTR2B	2q36.3-q37.1	0.0256544
PARM1	4q13.3-q21.3	0.0300066		2018-09-02	2q37	0.0256906
TTN	2q31	0.0300293		LUM	12q21.33	0.0256986
FCRL3	1q21-q22	0.0300362		ADGRA3	4p15.2	0.0257676
BCL2L13	22q11.1	0.0301011		DLGAP4	20q11.23	0.0257716
ZFP42	4q35.2	0.03013		IKZF1	7p12.2	0.0258452
SMPDL3A	6q22.31	0.0301607		ERICH1	8p23.3	0.0258867
LOC100506274	2p25	0.0301652		MORC2	22q12.2	0.025905
DIP2B	12q13.12	0.0301936		SKP1	5q31	0.0259093
ST8SIA1	12p12.1-p11.2	0.0302106		TM2D1	1p31.3	0.0259135
TLE1	9q21.32	0.0302408		SOX9-AS1	17q24.3	0.0259978
LOC101928682	---	0.0303007		TMEM163	2q21.3	0.0260094
CBY1	22q12	0.0303779		TPP1	11p15	0.0260269
GC	4q12-q13	0.0304442		C21orf58	21q22.3	0.0260473
SH3GL1P2	17q11.2	0.0304782		TECPR2	14q32.31	0.02606
LRCH3	3q29	0.0305176		ECM2	9q22.3	0.0261004
FCGR2A	1q23	0.0305349		DNAJB4	1p31.1	0.0261334
CCDC181	1q24	0.0307243		SART1	11q13.1	0.0261634
SPEN	1p36	0.0309878		SRSF5	14q24	0.0261748
IL6R	1q21	0.0310544		HS2ST1	1p22.3	0.0262085
TBCD	17q25.3	0.0310873		APP	21q21.3	0.0262106
SLC6A6	3p25.1	0.0311342		CAD	2p22-p21	0.0262117
LOC101929147	1p12	0.0311575		ZNF41	Xp11.23	0.0262566
FGFBP1	4p15.32	0.0312467		PHF21B	22q13.31	0.0262614
FAM161A	2p15	0.031392		PADI2	1p36.13	0.0263118
GTF2H5	6q25.3	0.0314302		DNAH1	3p21.1	0.0264372
JRKL	11q21	0.0314516		LOC105376166	---	0.0264404
TMEM136	11q23.3	0.0315541		RYK	3q22	0.0264852
DBN1	5q35.3	0.0316213		MEIOC	17q21.31	0.0265052
PVR	19q13.2	0.0316731		C2orf71	2p23.2	0.0266612
GRIA3	Xq25	0.0317279		BEND7	10p13	0.0268815
PSMA7	20q13.33	0.0317443		PPIE	1p32	0.0268904
GUCY2C	12p12	0.0317753		SART3	12q24.1	0.026922
SLC11A1	2q35	0.0318176		ITGB4	17q25	0.026953
SEC24C	10q22.2	0.031826		CD96	3q13.13-q13.2	0.0269892
ADORA3	1p13.2	0.0318695		CCDC9	19q13.32	0.0270248
LOC105376944	---	0.0319149		ARHGEF10	8p23	0.027061
GTSE1	22q13.2-q13.3	0.0319247		AOAH	7p14.2	0.0271372
TRPM1	15q13.3	0.0319324		GPR161	1q24.2	0.0271565
PPP1R2	3q29	0.0320189		PDXDC1	16p13.11	0.0271764
GGH	8q12.3	0.0320223		SERPINB6	6p25	0.027307
ADGRA3	4p15.2	0.03204		SLAMF1	1q23.3	0.027347
ZKSCAN7	3p21.32	0.0320768		ATM	11q22-q23	0.0273936
RBM15B	3p21.2	0.0321357		CLNK	4p16.1	0.0274199
SPATA13	13q12.12	0.0322232		CDK17	12q23.1	0.0275243
DNAJB12	10q22.1	0.0323147		ARHGEF2	1q21-q22	0.0275753
ZEB2	2q22.3	0.0323297		MCAM	11q23.3	0.0276087
C20orf197	20q13.33	0.0323409		PTPRO	12p13.3-p13.2|12p13-p12	0.0276374
PAFAH1B3	19q13.1	0.0324206		FKBP15	9q32	0.0276502
LOC101927196	2q32.1	0.0324927		MAATS1	3q13.33	0.0276883
MBD2	18q21	0.0324987		ALDH2	12q24.2	0.0277698
RUNX1	21q22.3	0.0325014		MACROD1	11q11	0.0277771
CEP57	11q21	0.0325177		PKP4	2q24.1	0.0278203
CREBL2	12p13	0.0326315		PRPSAP1	17q24-q25	0.0279004
RAB5C	17q21.2	0.0327251		NCF4	22q13.1	0.0279148
DHX8	17q21.31	0.0327506		KLC3	19q13	0.0279578
SNRPN	15q11.2	0.0327628		TCAP	17q12	0.027958
TRIM37	17q23.2	0.0329035		EFNA2	19p13.3	0.0280249
KIF2A	5q12-q13	0.032913		ZNF568	19q13.12	0.0280362
UBE3D	6q14.1	0.0329178		GSTT2	22q11.23	0.0280545
LDHAL6A	11p15.1	0.032921		SNX20	16q12.1	0.028096
BRICD5	16p13.3	0.032936		RHOBTB2	8p21.3	0.0281427
VPS41	7p14-p13	0.033007		CPA2	7q32	0.0281911
USP25	21q11.2	0.0330974		SREK1	5q12.3	0.0282375
ERICH5	8q22.2	0.0331168		LY86	6p25.1	0.0282912
PTPN21	14q31.3	0.033141		CLASP2	3p22.3	0.02831
TEAD1	11p15.2	0.0331476		FOXJ3	1p34.2	0.0283355
LINC00957	7p13	0.033222		COL1A1	17q21.33	0.0283466
EPG5	18q12.3	0.0332291		PPP2R5E	14q23.1	0.02837
ELMO2	20q13	0.0333186		SYNCRIP	6q14-q15	0.028374
THEM4	1q21	0.0333548		PAPD4	5q14.1	0.0284177
CUL5	11q22.3	0.0334125		FARP1	13q32.2	0.0284429
DDX53	Xp22.11	0.033436		HELQ	4q21.23	0.0284849
DHX30	3p21.31	0.0334362		MNDA	1q22	0.0285184
TRAFD1	12q	0.0334505		ATP6V1C1	8q22.3	0.0285307
CCDC82	11q21	0.0334538		CALD1	7q33	0.0285554
RTP5	2q37.3	0.0334827		MGC40069	14q11.2	0.0285908
ITGA11	15q23	0.033543		CD300LF	17q25.1	0.0286089
LOC285819	6p22.1	0.0336056		DKK3	11p15.2	0.0286183
HEATR6	17q23.1	0.0336103		POU6F1	12q13.13	0.0286259
LINC01365	---	0.0336646		OCEL1	19p13.11	0.0287968
CD74	5q32	0.0336916		CD37	19q13.3	0.0288439
GVINP1	11p15.4	0.0336918		EBNA1BP2	1p35-p33	0.0290094
CFDP1	16q22.2-q22.3	0.0337394		EIF5B	2q11.2	0.0290223
MEG3	14q32	0.0338601		PLCL1	2q33	0.0290296
GPR82	Xp11.4	0.033874		RTEL1-TNFRSF6B	20q13.3	0.0290683
ATXN1	6p23	0.0339347		GTF2A1	14q31.1	0.0290692
RERE	1p36.23	0.0340712		PTAFR	1p35-p34.3	0.0290731
CSE1L	20q13	0.0341683		SIGMAR1	9p13.3	0.0290981
GAP43	3q13.31	0.0342242		LOC105375624	---	0.0291608
EIF3D	22q13.1	0.0342351		RPL37	5p13	0.0292325
HEATR9	17q12	0.0342517		HMGB1	13q12	0.0292602
LINC00937	12p13.31	0.0343842		SPATA13	13q12.12	0.0293727
TRMT1	19p13.2	0.0344817		GSTT1	22q11.23	0.0293775
PLPPR1	9q31.1	0.0345042		ZMAT3	3q26.32	0.0294206
CSNK2A2	16q21	0.0345299		WDR3	1p12	0.0294609
KLF9	9q13	0.0345658		CDC25B	20p13	0.0294688
DPYD	1p22	0.0346311		MANF	3p21.1	0.0295155
TNFRSF1B	1p36.22	0.0346375		CACNA1A	19p13	0.0295965
DAP	5p15.2	0.0346626		FCRL3	1q21-q22	0.0296276
SLC36A1	5q33.1	0.0346679		ENPP1	6q22-q23	0.0296311
CBL	11q23.3	0.034675		NUFIP1	13q14	0.0296672
PITRM1-AS1	---	0.0346798		RER1	1p36	0.0297636
LOC100288798	12q13.11	0.0346844		ZBTB44	11q24.3	0.0298046
SLMAP	3p21.2-p14.3	0.0347264		SORBS2	4q35.1	0.029853
FOXN3	14q31.3	0.0347499		DST	6p12.1	0.0298608
OGDH	7p14-p13	0.034773		UMPS	3q13	0.0298764
ZSCAN10	16p13.3	0.0347942		HERC3	4q21	0.0299258
GPR12	13q12	0.0348309		PPP1R7	2q37.3	0.0299824
LINC00555	13q33.1	0.0348452		ZNF621	3p22.1	0.0300033
NR5A2	1q32.1	0.0348914		SPG11	15q14	0.0300052
PTPRC	1q31-q32	0.0349932		MORN1	1p36.33-p36.32	0.0300647
PIK3AP1	10q24.1	0.03501		PIK3AP1	10q24.1	0.0300926
FYB	5p13.1	0.0350148		STX7	6q23.1	0.0301238
ERICH1	8p23.3	0.0350247		BTG2	1q32	0.0301471
CD5	11q13	0.0350403		ADRBK1	11q13.1	0.0301872
IL11	19q13.3-q13.4	0.0350415		CXCL12	10q11.1	0.0301926
FBXO10	9p13.2	0.0350896		C1S	12p13	0.030217
LINC01333	5q13.3	0.0351294		ITGA1	5q11.2	0.0302276
ATP6V0C	16p13.3	0.0351374		SLC29A2	11q13	0.0303844
LOC105372966	---	0.0351675		NAT9	17q25.1	0.0304968
LILRB4	19q13.4	0.0351885		PPIH	1p34.1	0.0305361
GNA13	17q24.3	0.0352459		RASGRF1	15q24.2	0.0306485
GSPT2	Xp11.22	0.0352586		SYMPK	19q13.3	0.0306789
ANAPC15	11q13.4	0.0353039		CST6	11q13	0.0307468
SLC2A5	1p36.2	0.0353891		CHST15	10q26	0.0307997
FARP1	13q32.2	0.0354263		GTF2I	7q11.23	0.030841
IL12A-AS1	3q25.33	0.0354271		PTGER4	5p13.1	0.0308548
SPATA31E1	9q22.1	0.0354388		WDR20	14q32.31	0.0309036
MFAP1	15q15.3	0.0355896		SCNN1A	12p13	0.0310587
AKR1C1	10p15-p14	0.0356254		STK10	5q35.1	0.0310923
CALD1	7q33	0.0356604		RAMP2-AS1	17q21.31	0.0311002
COA1	7p13	0.0358286		SRP54	14q13.2	0.0312063
LRRN1	3p26.2	0.0358662		PCDH7	4p15	0.0312551
ZNF354B	5q35.3	0.0358697		KALRN	3q21.2	0.0312567
SH2D4B	10q23.1	0.0358893		RFTN1	3p24.3	0.0312833
LRTOMT	11q13.4	0.0358906		CHAF1A	19p13.3	0.0312884
LPGAT1	1q32	0.0360046		ARID4A	14q23.1	0.0313708
G3BP2	4q21.1	0.0360644		GEM	8q13-q21	0.0314764
SUN1	7p22.3	0.036084		FLJ45482	---	0.0315039
LOC339468	1p31.1	0.0360845		BPGM	7q33	0.0315042
SEL1L	14q31	0.0361169		LGALS3	14q22.3	0.0315122
RBM15	1p13	0.0361488		LOC340107	5p14.1	0.03155
BCL11A	2p16.1	0.0361852		HNCAT21	5q23.1	0.0316043
VPS18	15q15.1	0.0362384		HRK	12q24.22	0.031609
RRP8	11p15.4	0.0362429		LRRC6	8q24.22	0.031646
CARD11	7p22	0.0362606		CSF2RA	Xp22.32 and Yp11.3	0.0316745
PRR5L	11p13-p12	0.0363229		PRDX2	19p13.2	0.0316904
EIF3H	8q24.11	0.0363515		TGFBI	5q31	0.0317158
ERCC6L2	9q22.32	0.0364095		NF1	17q11.2	0.0317621
FNDC3A	13q14.2	0.0364104		TLR4	9q33.1	0.0317821
FCN2	9q34.3	0.0365295		CPSF6	12q15	0.0318141
TSPEAR	21q22.3	0.0365729		KCNK1	1q42-q43	0.0318912
TAS1R1	1p36.23	0.0365923		SRPR	11q24.2	0.031896
TLR4	9q33.1	0.036605		PRKCA	17q22-q23.2	0.0319145
PIGG	4p16.3	0.0366547		ASXL2	2p24.1	0.0319584
NDST4	4q26	0.0367474		GFER	16p13.3-p13.12	0.0320856
HLA-DMB	6p21.3	0.0368612		PVR	19q13.2	0.0321115
MRE11A	11q21	0.0369873		SASH3	Xq26	0.0321164
SLC30A5	5q12.1	0.0369949		NLRP10	11p15.4	0.0321254
B4GALNT1	12q13.3	0.0370753		LOC102724814	14q11.2	0.0321936
PAPOLG	2p16.1	0.0370976		DACH1	13q22	0.0322092
LIPA	10q23.2-q23.3	0.0371115		CLASRP	19q13.3	0.032248
POLK	5q13	0.0371227		VTI1A	10q25.2	0.0322908
MYRF	11q12-q13.1	0.0371516		SLC16A4	1p13.3	0.0323006
ZNF507	19q13.11	0.0371632		CAV1	7q31.1	0.032313
DOCK4	7q31.1	0.0372388		IL6R	1q21	0.0323319
STX6	1q25.3	0.0372684		AGFG2	7q22.1	0.0323384
CTNNA3	10q22.2	0.0373471		CPEB3	10q23.32	0.0323934
MET	7q31	0.0373827		LOC101927151	19q11	0.0323942
HEXA	15q24.1	0.0374651		MIER1	1p31.3	0.0324089
AGO2	8q24	0.037532		FAM8A1	6p23	0.0325103
RGS12	4p16.3	0.0375412		HLA-E	6p21.3	0.032516
PRKCD	3p21.31	0.0375678		CD8A	2p12	0.032559
LARP1B	4q28.2	0.0375714		ATP6V1G2-DDX39B	6p	0.0325715
LOC254028	14q11.2	0.0375855		ANK3	10q21	0.032584
WDR20	14q32.31	0.0375926		ICA1L	2q33.2	0.032587
RNF6	13q12.2	0.0376307		B2M	15q21.1	0.032587
MGC40069	14q11.2	0.0376988		NEFM	8p21	0.0326208
POM121L9P	22q11.22	0.0377148		COL6A3	2q37	0.0326289
ZNF264	19q13.4	0.0377524		VRK3	19q13	0.0326707
TGOLN2	2p11.2	0.0377559		CTSB	8p22	0.0326921
C9orf62	9q34.3	0.0377713		ZBTB1	14q23.3	0.0326929
GIMAP1	7q36.1	0.0378215		PIP4K2A	10p12.2	0.0327425
XK	Xp21.1	0.0378807		CDKN1A	6p21.2	0.0327464
DIO3OS	14q32.31	0.0379962		PIGK	1p31.1	0.0327555
VASH1	14q24.3	0.0380376		LOC105378382	---	0.0327568
MS4A4A	11q12	0.0380537		IGFBP4	17q21.2	0.0327905
VASH2	1q32.3	0.0380621		APOE	19q13.2	0.0328374
HSD11B2	16q22	0.0381115		XG	Xp22.33	0.0328755
TPTE2P2	13q14.3	0.0381536		TCP11L2	12q23.3	0.0328882
ZNF24	18q12	0.0382124		MAN2C1	15q24.2	0.0329116
ANK1	8p11.1	0.0382812		UCN	2p23.3	0.0329408
TAS2R39	7q34	0.038372		NPEPPS	17q21	0.0329453
SPAG16	2q34	0.0383731		PGAM1	10q25.3	0.0330252
SVEP1	9q32	0.0385039		XYLB	3p22-p21.3	0.0330492
PLA2G1B	12q24.31	0.0385792		KMT2C	7q36.1	0.03308
CPD	17q11.2	0.0385836		IMPDH1	7q31.3-q32	0.0330962
2018-09-07	7p14.2	0.038729		CLLU1	12q22	0.0332732
SP140L	2q37.1	0.0387291		FEZ1	11q24.2	0.0332897
CLPP	19p13.3	0.0387861		GPR173	Xp11	0.0333231
ENO3	17p13.2	0.0387876		SDF2	17q11.2	0.0333856
DIMT1	5q12.1	0.0388034		STX4	16p11.2	0.0334222
SNX25	4q35.1	0.0388549		GNS	12q14	0.0334382
SGK1	6q23	0.0388598		ARHGAP26-AS1	---	0.0335975
PECAM1	17q23.3	0.0389273		TAGAP	6q25.3	0.0336047
2018-09-08	5q31	0.0390188		LOC284219	18p11.22	0.0336457
PCYT1A	3q29	0.0391462		AEBP1	7p13	0.0336646
ANKRD20A5P	18p11.21	0.0391559		PCYT1B	Xp22.11	0.0336863
VAV1	19p13.3	0.0391607		FCRL2	1q21	0.0337523
TIMM44	19p13.2	0.0391767		MVP	16p11.2	0.0338208
PCDH7	4p15	0.0392549		CLRN1	3q25	0.0339283
MORF4L2	Xq22	0.0392753		METTL20	12p11.21	0.0339347
ATP8B3	19p13.3	0.0392799		C5orf28	5p12	0.0339459
DNAJC13	3q22.1	0.0393602		ARL6IP5	3p14	0.0339576
CPSF6	12q15	0.0393636		CYTH4	22q12.3-q13.1	0.0339585
UHRF1BP1	6p21	0.0394168		HS3ST3B1	17p12	0.0339921
BTNL9	5q35.3	0.0394616		SMARCC1	3p21.31	0.0340201
LOC101927151	19q11	0.0394759		MLH3	14q24.3	0.0340243
MANEA	6q16.1	0.039484		BIN1	2q14	0.0340618
XG	Xp22.33	0.0395391		MFNG	22q12	0.0341337
RAB3GAP2	1q41	0.0395455		DNAJC5B	8q13.1	0.0342069
IL17RA	22q11.1	0.0395465		TGFB3	14q24	0.0342309
CLN6	15q23	0.0396133		KLHL3	5q31	0.0342883
CHD2	15q26	0.0396298		CD1D	1q23.1	0.034409
SCARB2	4q21.1	0.0396368		IDE	10q23-q25	0.0344574
WDR1	4p16.1	0.0396666		PSMA3	14q23	0.0345863
SON	21q22.11	0.0398188		LINC00662	19q11	0.0345984
CCDC86	11q12.2	0.0398474		ZNF91	19p12	0.0346393
SRSF4	1p35.3	0.0399133		SH3GL1	19p13.3	0.0346828
ZNF782	9q22.33	0.0399522		NASP	1p34.1	0.0347463
LOC285043	2p23.3	0.0399526		HTRA1	10q26.3	0.034781
SLC24A4	14q32.12	0.0401338		SYNPO	5q33.1	0.0348523
LINC00424	---	0.0402201		NDRG2	14q11.2	0.0348529
FAM76B	11q21	0.0402813		SRRT	7q21	0.0349478
SLC39A14	8p21.3	0.0402908		LATS1	6q25.1	0.0350305
LYPD8	1q44	0.0403675		RPS19	19q13.2	0.0350408
CPSF1	8q24.23	0.0403976		HPGDS	4q22.3	0.0351258
LINC00892	Xq26.3	0.0404308		PHF23	17p13.1	0.035131
KCNAB2	1p36.3	0.0404814		ZSCAN9	6p21.3	0.0351855
NAV2-IT1	---	0.0405597		PPIC	5q23.2	0.0352124
MROH2B	5p13.1	0.0405784		SCN2A	2q24.3	0.0352137
TRIM29	11q23.3	0.0405882		GSTO1	10q25.1	0.0352232
WHAMMP2	15q11.2	0.0406126		RASEF	9q21.32	0.0352842
DLGAP1-AS2	18p11.31	0.0406152		SIRT5	6p23	0.0353164
TNXB	6p21.3	0.0406657		PCP2	19p13.2	0.0353717
LOC101927606	---	0.0406676		BRD4	19p13.1	0.0354155
BMS1P20	22q11.22	0.0406746		GNG2	14q21	0.0354287
IFT43	14q24.3	0.0406976		MDFIC	7q31.1-q31.2	0.0354896
ZNF195	11p15.5	0.0407105		MRE11A	11q21	0.0355162
HDAC1	1p34	0.0408261		LOC100130264	20p11.23	0.0355429
SLC25A27	6p12.3	0.040832		CEP128	14q31.1	0.0356486
ERGIC3	20pter-q12	0.0408864		STEAP4	7q21.12	0.0356572
MAGEC1	Xq26	0.0409945		BCL2A1	15q24.3	0.0356666
CSDE1	1p22	0.0411147		CRIP1	14q32.33	0.0356909
LPAR6	13q14	0.0411788		ATP5O	21q22.11	0.0357194
SLC25A20	3p21.31	0.0412053		MPPED2	11p13	0.0357398
XKR6	8p23.1	0.0412325		TNRC6C	17q25.3	0.0357733
LOC101927410	18p11.22	0.0412395		POU2AF1	11q23.1	0.0358319
CHRM3-AS2	1q43	0.0412953		PRPF31	19q13.42	0.0358539
ITIH2	10p15	0.0413141		ZFP30	19q13.12	0.0358748
AXL	19q13.1	0.0413639		ADAM17	2p25	0.0359554
NRIP1	21q11.2	0.0413782		THOC1	18p11.32	0.0360244
TMEM106A	17q21.31	0.0414458		LINC01535	19q13.12	0.0360372
LINC00593	15q23	0.0414625		TLE1	9q21.32	0.036043
GTF3C2-AS1	2p23.3	0.0414647		RHBDL3	17q11.2	0.0360759
STOM	9q34.1	0.041505		LOC100131541	11q21	0.0361147
CYP1B1	2p22.2	0.0415323		LINC00463	13q12.13	0.0362123
ANKRD44-IT1	2q33.1	0.0415454		CDNF	10p13	0.0362777
CD33	19q13.3	0.041617		ARHGEF28	5q13.2	0.0363003
LINC00536	8q23.3	0.0416967		KCNN3	1q21.3	0.0363132
MAN1A2	1p13	0.0417506		FAM188B	7p	0.0363416
LINC01393	7q31.2	0.0418056		MYO5A	15q21	0.0363548
RABEP1	17p13.2	0.0418212		ETS1	11q23.3	0.0363686
COX6B1	19q13.1	0.0418302		DAZL	3p24.3	0.0365138
FGD2	6p21.2	0.0418526		SFPQ	16q24.1	0.0365423
LINC00290	4q34.3	0.0419285		TROAP	12q13.12	0.036574
GPD1	12q13.12	0.0419639		ARF6	14q21.3	0.0366059
KIAA1456	8p22	0.0421263		MICA	6p21.33	0.0366245
TTLL10	1p36.33	0.0421779		LOC401261	6p21.1	0.0366466
MTMR3	22q12.2	0.0421914		TRAF3IP3	1q32	0.0366869
AKT1S1	19q13.33	0.0422285		NIPA1	15q11.2	0.0368212
LOC100507654	---	0.042263		DCT	13q32	0.0368314
LOC100507283	---	0.0425447		LINS1	15q26.3	0.0370205
SYNPO	5q33.1	0.0425948		PSMB1	6q27	0.037047
KCNIP2	10q24	0.0426398		MNAT1	14q23	0.0370612
HNRNPD	4q21	0.0426967		LOC105370697	---	0.0370668
TOR1AIP1	1q24.2	0.0427765		ADGRL1	19p13.2	0.0370685
HGD	3q13.33	0.0428116		LOC101928140	6q22.33	0.0371006
LINC00307	21q22.11	0.0428211		LOC400756	1p31.3	0.0371875
LOC105370622	---	0.0428288		SLC1A2	11p13-p12	0.0372381
FBXW2	9q34	0.0428359		SRRM1	1p36.11	0.0373384
HCP5B	6p21.3	0.0428676		ZNF585A	19q13.12	0.0374393
ATXN2	12q24.1	0.0431455		MPZL1	1q24.2	0.0374466
PSEN1	14q24.3	0.0431608		AREL1	14q24.3	0.037455
DTNA	18q12	0.0432342		LOC647070	1q25.3	0.0375999
TTBK2	15q15.2	0.0433049		PLA2G7	6p21.2-p12	0.0376723
PLD4	14q32.33	0.0433566		FBXW2	9q34	0.0377468
PCBP1-AS1	2p14	0.0433929		THBS2	6q27	0.0378241
FER	5q21	0.0434954		LOC101930105	Xp22.33	0.037856
SOX9-AS1	17q24.3	0.0435406		MAGIX	Xp11.23	0.0378562
LINC01134	1p36.32	0.0435751		PRDX3	10q25-q26	0.0380778
C10orf76	10q24.32	0.0437481		CCT7	2p13.2	0.0380917
PCM1	8p22-p21.3	0.0437653		FOXC1	6p25	0.0381611
LOC105375531	---	0.0438208		2018-09-15	1p31	0.0382882
LINC00969	3q29	0.0438813		FAM20B	1q25	0.0382915
LOC400627	17q25.3	0.0439808		GUK1	1q32-q41	0.0382994
INTS4	11q14.1	0.0440599		FCGR3B	1q23	0.0383334
GNL2	1p34.3	0.0441452		BMP6	6p24-p23	0.0383527
ATOH8	2p11.2	0.0441472		SYNGR2	17q25.3	0.038399
PSMD5-AS1	9q33.2	0.0441474		CREB1	2q34	0.0385
HEXIM1	17q21.31	0.0441783		DDX5	17q21	0.0385096
DEFB105A	8p23.1	0.0441909		YEATS2	3q27.1	0.0385423
FAM153B	5q35.2	0.0442212		ATP5J2	7q22.1	0.0386068
EML4	2p21	0.0442743		NUMA1	11q13	0.038775
PDE10A	6q26	0.0442774		HCLS1	3q13	0.0387816
SNX20	16q12.1	0.0442941		SLC16A7	12q13	0.0388158
IQCF5-AS1	3p21.2	0.0442985		HEXB	5q13	0.038835
GINS4	8p11.21	0.0444187		SLC24A4	14q32.12	0.0388378
SIAE	11q24	0.0444666		CR1	1q32	0.0388407
FBP2	9q22.3	0.0444881		BICD1	12p11.2-p11.1	0.0389245
AFF1	4q21	0.0445512		ICAM1	19p13.3-p13.2	0.0389423
ARPC5	1q25.3	0.0445813		ZNF831	20q13.32	0.0390582
ROR1-AS1	---	0.0446065		TTC39C	18q11.2	0.039153
AKAP17A	Xp22.33 and Yp11.32	0.0446608		INO80C	18q12.2	0.0391849
CHRNA1	2q31.1	0.044735		CYB5R1	1q32.1	0.0392124
PLA2G4C	19q13.3	0.0449069		LMF1	16p13.3	0.039305
C2	6p21.3	0.0449315		SSBP2	5q14.1	0.039582
VLDLR-AS1	9p24.2	0.0449353		PRSS23	11q14.1	0.0396552
ZBTB1	14q23.3	0.0449387		FMO1	1q24.3	0.0397048
ARID3A	19p13.3	0.0449974		CMTM7	3p22.3	0.039794
SEC23IP	10q25-q26	0.0450424		RIMS2	8q22.3	0.0399584
TMEM67	8q22.1	0.0451536		MIER3	5q11.2	0.0399798
API5	11p11.2	0.0452288		RECQL4	8q24.3	0.0400416
P2RX7	12q24	0.0452568		AQP2	12q12-q13	0.0400493
PEX2	8q21.1	0.0453803		GAS2	11p14.3	0.0400639
FAM71B	5q33.3	0.0454815		GABARAP	17p13.1	0.0401222
SYNGR1	22q13.1	0.0455183		BCL2L2-PABPN1	14q	0.0401745
LINC00491	5q21.2	0.0455301		SNX1	15q22.31	0.0404083
LOC102723382	---	0.0455358		ANKRD13C	1p31.1	0.0405086
PTMA	2q37.1	0.0455674		CNTFR-AS1	9p13	0.0405905
AVIL	12q14.1	0.0456588		PPP3CB	10q22.2	0.0407475
ZCCHC10	5q31.1	0.045702		COL9A3	20q13.3	0.040787
N4BP1	16q12.1	0.045713		ADAMDEC1	8p21.2	0.040832
TMIE	3p21	0.0457445		ARHGAP11B	15q13.2	0.0409238
NFIA-AS2	---	0.0457997		FOLR2	11q13.3-q13.5	0.0409593
RFXANK	19p12	0.0458037		PUS10	2p16.1	0.0410722
LOC401320	7p15.1	0.045861		PCDHGA4	5q31	0.0410842
PIK3CG	7q22.3	0.0460027		DCTN1	2p13	0.0410854
MKRN1	7q34	0.0460082		CLCN4	Xp22.3	0.04109
AGAP1	2q37	0.0460477		ABI3BP	3q12	0.0411197
PAIP2	5q31.2	0.0460498		RDH13	19q13.42	0.0411478
RPS20	8q12	0.0460558		RBM26-AS1	---	0.0411893
PNLIPRP1	10q25.3	0.0460857		WDR62	19q13.12	0.0412123
ARID1B	6q25.1	0.0460994		IRAK1	Xq28	0.0412499
MAPK14	6p21.3-p21.2	0.0461354		CNPY1	7q36.3	0.0412532
SLC8A1	2p22.1	0.0461444		GDE1	16p12-p11.2	0.0412853
MOB1A	2p13.1	0.0461714		IDI2	10p15.3	0.041305
CCDC125	5q13.2	0.0461856		CD81-AS1	11p15.5	0.0413202
TBC1D26	17p11.2	0.0462187		SCN3B	11q23.3	0.0413327
ATF7	12q13	0.0462767		BRD8	5q31	0.0413504
PTEN	10q23.3	0.0463958		PDPN	1p36.21	0.0413508
KDELR2	7p22.1	0.046465		CD38	4p15	0.0413517
CWF19L2	11q22.3	0.0464864		TRPC6	11q22.1	0.0413807
CARD8	19q13.33	0.0464966		AKR1E2	10p15.1	0.0414016
ACYP2	2p16.2	0.0465294		TNFSF10	3q26	0.0414191
LOC283194	11q12.2	0.0465555		FOXP1	3p14.1	0.0414894
RPRD1A	18q12.2	0.0465686		SSRP1	11q12	0.0414942
SEMA4D	9q22.2	0.0465764		RNF41	12q13.13	0.0415105
CSMD2-AS1	---	0.0466224		PCSK7	11q23-q24	0.0415346
KLHL34	Xp22.12	0.0467619		TREML4	6p21.1	0.0416514
SET	9q34	0.0468396		DNAJB12	10q22.1	0.0417032
ATP5O	21q22.11	0.0469751		IQCH	15q23	0.0417281
LINC01550	14q32.2	0.0470036		C11orf54	11q21	0.0419173
LOC284080	17q21.33	0.0470075		TBCD	17q25.3	0.0419283
ARHGEF7-IT1	13q34	0.0470268		LAMA2	6q22-q23	0.0419537
IL23R	1p31.3	0.0470841		GNG4	1q42.3	0.0419941
SOX9	17q24.3	0.0471104		CD63	12q12-q13	0.0419946
LOC101929441	1q32.1	0.0471311		SPECC1L-ADORA2A	22q11.23	0.0420221
CD180	5q12	0.0471586		TMEM243	7q21.12	0.0421202
VN1R4	19q13.42	0.0471629		LOC102723382	---	0.0421522
MYOF	10q24	0.0471893		MED26	19p13.11	0.0421534
LOC102723648	---	0.0472626		SFRP4	7p14.1	0.0421665
ACTR2	2p14	0.0472992		DUSP1	5q34	0.042173
RPS16	19q13.1	0.0473113		CELF1	11p11	0.0422427
SIRPB1	20p13	0.047341		BRD3	9q34	0.0422429
STK4	20q11.2-q13.2	0.0473794		LRRC74B	22q11.21	0.0422929
GNPDA1	5q21	0.0473854		KHSRP	19p13.3	0.0423304
ZNF92	7q11.21	0.0473938		BTBD7	14q32.12	0.0423448
BTG1	12q22	0.0474		LINC00622	1p12	0.0423533
GTF3A	13q12.3-q13.1	0.0474484		TM9SF2	13q32.3	0.0423884
NF1	17q11.2	0.0474802		FAH	15q25.1	0.0424035
ADRBK2	22q12.1	0.04749		TNFSF12	17p13	0.0424382
CHD4	12p13	0.0475373		DDX11-AS1	---	0.0424439
LOC101928227	15q14	0.0475451		STAP1	4q13.2	0.0424522
SETD6	16q21	0.0475637		CLN6	15q23	0.0424634
RAB14	9q33.2	0.0475816		LINC01206	3q26.33	0.0424847
RAX2	19p13.3	0.0476201		RAB27B	18q21.2	0.0424872
LOC285181	2q36.1	0.0476459		RNF157	17q25.1	0.0425779
PRPF4B	6p25.2	0.0476519		LOC105377371	---	0.0425926
TSNAX-DISC1	1q42.1	0.0476622		ADCY9	16p13.3	0.0426302
DYNC1H1	14q32	0.0476657		KANK1	9p24.3	0.0426556
CACUL1	10q26.11	0.0477588		FAM13A	4q22.1	0.0426713
CDSN	6p21.3	0.0477647		RPRD1A	18q12.2	0.0426872
PAX8	2q13	0.0477955		ACOX2	3p14.3	0.0427062
ARRB2	17p13	0.0478565		SLC25A20	3p21.31	0.0427586
GRID1	10q22	0.0479289		HNRNPH1	5q35.3	0.0427665
PRKAG1	12q12-q14	0.0479882		RP9P	7p14.3	0.042796
SLC22A7	6p21.1	0.0479996		BCAR3	1p22.1	0.0428886
SOX5	12p12.1	0.0480609		FKBP1B	2p23.3	0.0430001
ECD	10q22.3	0.0480645		GRB14	2q22-q24	0.0430027
RTP1	3q27.3	0.0481852		CTSH	15q25.1	0.0430734
CTSS	1q21	0.0482321		CARD8-AS1	---	0.0430898
PPP5C	19q13.3	0.0482381		HNRNPA3	10q11.21	0.0431673
OR2M4	1q44	0.048435		IGBP1	Xq13.1-q13.3	0.0432695
IVD	15q14-q15	0.0484789		STK24	13q31.2-q32.3	0.0433341
GALE	1p36-p35	0.0484794		SKAP2	7p15.2	0.0433649
EAPP	14q13.1	0.0484797		USP25	21q11.2	0.0435051
NAV3	12q21.2	0.0485633		SNCA	4q21	0.0435429
WDR3	1p12	0.0485807		TFAP2B	6p12	0.0436613
LOC100507194	---	0.0487748		LMOD1	1q32	0.0437343
P4HB	17q25	0.0487796		LEPROTL1	8p12	0.0438012
PRL	6p22.3	0.0488911		CNKSR2	Xp22.12	0.0438793
CAST	5q15	0.048898		PARVA	11p15.3	0.0439032
LOC101929284	5p15.31	0.0489218		LOC105370978	---	0.0439076
APCS	1q21-q23	0.0489946		SIRT2	19q13	0.0440012
ATG2B	14q32.2	0.049038		FAM160A1	4q31.3	0.0440565
KLHL4	Xq21.3	0.0491262		LDB2	4p16	0.0441013
CD99	Xp22.32 and Yp11.3	0.0492081		FCER1G	1q23	0.0441123
UBR4	1p36.13	0.0493019		PRRX1	1q24	0.0441215
REPS2	Xp22.2	0.0493052		GTPBP3	19p13.11	0.0441247
NOP16	5q35.2	0.0493507		LINC00525	7p12.3	0.0441527
CD300LF	17q25.1	0.0493835		HMGA1	6p21	0.0441919
GRAMD4	22q13.31	0.0494569		MITF	3p14.2-p14.1	0.0442266
CBARP	19p13.3	0.0495996		MYL6B	12q13.13	0.0442743
RNF17	13q12.12	0.0497391		MEI1	22q13.2	0.0442971
PHACTR2	6q24.2	0.0497546		PTGIR	19q13.3	0.0444085
NRXN1	2p16.3	0.0497693		KCNIP3	2q21.1	0.0444196
PML	15q22	0.0497782		SSPN	12p11.2	0.0444843
TAB2	6q25.1	0.049785		NCOA6	20q11	0.0445193
PRKAR2A	3p21.3-p21.2	0.0498562		FAM161A	2p15	0.0445603
ITGAL	16p11.2	0.0498689		TTLL5	14q24.3	0.0446082
FOLH1	11p11.2	0.0499183		WASH1	9p24.3	0.044627
NLRP6	11p15	0.0499622		CEP72	5p15.33	0.0447094
CSH1	17q24.2	0.049978		LTBP2	14q24	0.0448102
				NRP1	10p12	0.0448818
				THADA	2p21	0.0449576
				SMARCC2	12q13.2	0.0449754
				PHLDB2	3q13.2	0.0450234
				IFIT5	10q23.31	0.0450422
				UBE3C	7q36.3	0.0450866
				PCOLCE	7q22	0.0450905
				RNASE2	14q11.2	0.0451543
				MAGEA2	Xq28	0.0451708
				ADRBK2	22q12.1	0.0451718
				KLHDC1	14q21.3	0.0452101
				LOC101927752	---	0.0452333
				DPH2	1p34	0.0452346
				EPG5	18q12.3	0.0452683
				NDUFB1	14q32.12	0.0452758
				AAK1	2p14	0.0454113
				GPATCH2	1q41	0.0454312
				YPEL2	17q22	0.0454673
				PLEK	2p13.3	0.0455238
				BCL2L11	2q13	0.0456027
				COL1A2	7q22.1	0.0457287
				CC2D1A	19p13.12	0.045746
				ARMC8	3q22.3	0.0457924
				MGST3	1q23	0.0458785
				ZNF578	19q13.41	0.0460432
				PRPF19	11q12.2	0.0460775
				PSME1	14q11.2	0.0460857
				INPP5B	1p34	0.0461273
				LOC101928551	4q34.1	0.0461647
				UTP14C	13q14.2	0.0461864
				NUBP1	16p13.13	0.046221
				GBP2	1p22.2	0.0463059
				AMPH	7p14-p13	0.0463776
				UGP2	2p14-p13	0.0464344
				VASH1	14q24.3	0.0465127
				RRAGB	Xp11.21	0.0467679
				AMFR	16q21	0.046868
				AKR7A3	1p36.13	0.0469239
				MSH3	5q14.1	0.0470845
				BACH1	21q22.11	0.0471058
				EBAG9	8q23	0.0471123
				FGF9	13q11-q12	0.0471283
				SNORA65	9q34	0.0472505
				PAQR9	3q23	0.0472511
				CHEK1	11q24.2	0.0472641
				ZC3HAV1L	7q34	0.0473116
				GPRIN2	10q11.22	0.0473331
				CD80	3q13.3-q21	0.0473335
				CASP9	1p36.21	0.047375
				SIRPA	20p13	0.0473868
				IRAK3	12q14.3	0.0473911
				ZC3H11A	6q12	0.0474023
				METAP1D	2q31.1	0.0474228
				LOC102724927	16p13.3	0.0474389
				CTSS	1q21	0.0476779
				LOC729732	8p23.1	0.0476903
				SLC27A2	15q21.2	0.0477353
				LINC01356	1p13.2	0.047751
				G3BP2	4q21.1	0.0480209
				IFI30	19p13.1	0.048045
				TAF7	5q31	0.0480696
				ZAP70	2q12	0.0481247
				LUC7L3	17q21.33	0.0481743
				AMH	19p13.3	0.0481839
				FPR1	19q13.4	0.0482266
				PRELID3A	18p11.21	0.0482585
				CARD8	19q13.33	0.0482768
				GFPT2	5q34-q35	0.048371
				LOC643201	5q35.2	0.0483782
				ORC1	1p32	0.0483996
				TYROBP	19q13.12	0.04841
				ACTR2	2p14	0.0484425
				VPS29	12q24	0.0484723
				LIPJ	10q23.31	0.0484831
				NNT-AS1	---	0.0486334
				MAOB	Xp11.23	0.0486403
				CARD11	7p22	0.0486542
				RUNDC3A-AS1	17q21.31	0.0487737
				CCDC34	11p14.1	0.0490986
				RASA3	13q34	0.0490987
				PSMC6	14q22.1	0.0491201
				COPB1	11p15.2	0.0491287
				CENPI	Xq22.1	0.0491402
				NAA35	9q21.33	0.0491555
				LINC01016	---	0.0491964
				WDFY4	10q11.23	0.0492483
				SLC12A1	15q15-q21.1	0.0492996
				PMCH	12q23.2	0.0493139
				AIMP2	7p22	0.0493823
				SVEP1	9q32	0.0494211
				SULT1C2	2q12.3	0.0494523
				CREBRF	5q35.1	0.0494934
				ZNF286A	17p11.2	0.0496865
				DNAH14	1q42.12	0.0497091
				SMC4	3q26.1	0.0497524
				SHB	9p13.2	0.0497923
				CRHR1-IT1	17q21.31	0.0499163
				SCN1A	2q24.3	0.0499272
