# Supplementary material for: Whole Genome Transcriptome Analysis of the Association between Obesity and Triple Negative Breast Cancer in Caucasian Women
Source: Preprints.org preprint supplement (doi:10.20944/preprints201803.0174.v1), 2018-03-20
Supplement: Supplementary file 3 [file Table S2.xlsx]

## Sheet: Sheet1
Table S2. List of significantly differentially expressed genes showing evidence of association between TNBC and Obesity or overweight in women with postmenopausal status.
Also shown in this table is a list of significantly differentially expressed genes distinguishing obese from nonobese women.
	NORMAL vs OBESE				NORMAL vs OVERWEIGHT				OVERWEIGHT vs OBESE
Gene Symbol	Cytoband	unadj.p		Gene Symbol	Cytoband	unadj.p		Gene Symbol	Cytoband	unadj.p
MSX1	4p16.2	2e-06		TAGLN2	1q21-q25	2e-07		ZNF230	19q13.31	3.22e-05
IL4R	16p12.1-p11.2	2.3e-06		ZNF92	7q11.21	7.78e-05		PANX1	11q21	3.6e-05
STK10	5q35.1	1.94e-05		KEAP1	19p13.2	9.34e-05		KLF9	9q13	0.0002033
PLK3	1p34.1	2.57e-05		ZNF253	19p13.11	9.88e-05		EHD4	15q11.1	0.0002186
EPHA2	1p36	2.78e-05		YWHAH	22q12.3	0.0001381		ACOT11	1p32.3	0.0002212
MUT	6p12.3	3.21e-05		PLEC	8q24	0.0001463		SPPL3	12q24.31	0.0002258
SERPINE1	7q22.1	4.12e-05		TMC6	17q25.3	0.0001608		SEC23A	14q21.1	0.0002592
MVP	16p11.2	8.42e-05		CARHSP1	16p13.2	0.0001955		SEC62	3q26.2	0.0002813
TNC	9q33	0.0001344		YWHAZ	8q23.1	0.0002244		CSGALNACT1	8p21.3	0.000286
OSMR	5p13.1	0.0001383		JRK	8q24.3	0.0002548		CCNY	10p11.21	0.000289
MESDC1	15q13	0.0001408		PROM2	2q11.1	0.0002686		WWC2	4q35.1	0.00029
RBMS1	2q24.2	0.0001956		SMAD5	5q31	0.000284		SNX19	11q25	0.0003016
PDPN	1p36.21	0.0001991		ZNF138	7q11.21	0.0002931		WBP1L	10q24.32	0.0003083
ZEB2	2q22.3	0.0002178		MESDC1	15q13	0.0003143		COPS8	2q37.3	0.0003171
CTDSP2	12q14.1	0.0002433		ZNF85	19p12	0.0003444		PPP2R2A	8p21.2	0.0003772
PTPRE	10q26	0.0003043		ZNF736	7q11.21	0.00042		LRRFIP1	2q37.3	0.0004302
TWIST2	2q37.3	0.0003351		NADSYN1	11q13.4	0.0004801		SMG7	1q25	0.0004361
PML	15q22	0.0003486		SRSF9	12q24.31	0.0004921		ARF1	1q42	0.0004746
C6orf141	6p12.3	0.0003859		BAHD1	15q15.1	0.0005181		DUSP4	8p12-p11	0.0005093
WWTR1-AS1	3q25.1	0.0004406		ZBTB3	11q12.3	0.000528		LOC101927523	10q25.1	0.0005321
MGAT1	5q35	0.0004463		SRSF7	2p22.1	0.000554		LRCH3	3q29	0.000537
GCLC	6p12	0.0004633		BBS9	7p14	0.0006191		BCAP29	7q22.3	0.0005574
PELO	5q11.2	0.0004951		FOSL2	2p23.3	0.0006609		PDPN	1p36.21	0.0005659
SLC2A3	12p13.3	0.0005059		ACLY	17q21.2	0.0006759		SMS	Xp22.1	0.000574
SSH1	12q24.11	0.0005417		KANSL1L	2q34	0.0007283		TRPC1	3q23	0.000596
PRKACA	19p13.1	0.0006265		TFAP2A-AS1	6p24.3	0.0007663		ANGPT2	8p23.1	0.0006201
PXN	12q24.31	0.000652		SMG7	1q25	0.0007708		ZNF140	12q24.33	0.0006357
PLEC	8q24	0.0006729		DUOXA1	15q21.1	0.0007715		PKD2	4q22.1	0.0006785
FAS	10q24.1	0.0007371		HNF4A-AS1	---	0.0008		PLP2	Xp11.23	0.0006877
DUSP1	5q34	0.0007773		EPHA2	1p36	0.0008114		CCDC7	10p11.22	0.0006919
PTAFR	1p35-p34.3	0.000786		C11orf54	11q21	0.0009702		SSBP2	5q14.1	0.0006979
SCARF1	17p13.3	0.0008071		ZNF506	19p13.11	0.0009789		CYP2U1	4q25	0.0007586
KLF7	2q32	0.0008394		C11orf57	11q23.1	0.0010219		MGAT2	14q21	0.0007622
FPR1	19q13.4	0.0008482		HPCAL1	2p25.1	0.0010381		FOXP2	7q31	0.0007641
CD163	12p13.3	0.0008624		KLHDC7B	22q13.33	0.0010833		YWHAZ	8q23.1	0.000765
RAP1B	12q14	0.0008788		PLP2	Xp11.23	0.0011778		IGBP1	Xq13.1-q13.3	0.0008249
CTSL	9q21.33	0.0008961		ZNF592	15q25.3	0.001202		STK17B	2q32.3	0.0008398
GGT5	22q11.23	0.0009292		TTLL13P	15q26.1	0.0012036		KCNQ3	8q24	0.0008512
GLI2	2q14	0.0009512		RAB34	17q11.2	0.0012231		DUSP1	5q34	0.0008788
ITGA5	12q11-q13	0.0009697		ATM	11q22-q23	0.001286		TRIM32	9q33.1	0.0008994
RBBP6	16p12.2	0.0009792		STX8	17p12	0.0013142		SCARB1	12q24.31	0.0009006
MKL1	22q13	0.0009824		PAX8	2q13	0.0013283		PTGER4	5p13.1	0.0009358
ST7L	1p13.2	0.0009862		ODF3	11p15.5	0.0013421		PICALM	11q14	0.0009504
ANGPT2	8p23.1	0.0009922		NEK1	4q33	0.0013578		PSMF1	20p13	0.0009874
USB1	16q21	0.0010422		CSRNP3	2q24.3	0.0014183		JRK	8q24.3	0.0009931
ZNF138	7q11.21	0.0010561		RAB11FIP2	10q26.11	0.0014234		ENTPD6	20p11.21	0.0010701
ADAM23	2q33	0.0010819		ZKSCAN5	7q22	0.0014249		TCF4	18q21.1	0.0011034
CDYL2	16q23.2	0.0010825		ASAP1-IT2	---	0.0015889		FTH1	11q13	0.0011351
BCL10	1p22	0.0011126		KCNN4	19q13.2	0.0016691		CCNH	5q13.3-q14	0.0011439
S100A3	1q21	0.0011327		SYTL3	6q25.3	0.0016983		STK17A	7p13	0.0011908
RHOG	11p15.5-p15.4	0.0012791		SYNGR2	17q25.3	0.001723		SNAPC1	14q22	0.0012487
PIP4K2A	10p12.2	0.0012879		ING3	7q31	0.0017732		HS2ST1	1p22.3	0.0013429
CYTH4	22q12.3-q13.1	0.0012884		TGFBRAP1	2q12.1	0.0017794		RAPGEF2	4q32.1	0.0013606
ZNF736	7q11.21	0.0012987		KLHL8	4q22.1	0.0018615		MRPS12	19q13.1-q13.2	0.0013756
PFKFB3	10p15.1	0.0013238		CUL5	11q22.3	0.0018753		CPE	4q32.3	0.0013763
STAB1	3p21.1	0.0013474		LOC101927865	2q33.3	0.0019109		CR1	1q32	0.0014016
OPCML	11q25	0.0013862		CDYL2	16q23.2	0.0019508		KIAA0141	5q31.3	0.0014079
CSF1R	5q32	0.0014286		AP2M1	3q28	0.0019898		COQ10B	2q33.1	0.0014587
SKAP2	7p15.2	0.0014314		ZNF43	19p13.1-p12	0.0019971		2018-03-01	4q32.2	0.0014617
PANX1	11q21	0.0014365		ZNF195	11p15.5	0.002027		CREBRF	5q35.1	0.0014629
SIRPB2	20p13	0.0014386		ZNF493	19p12	0.002107		DR1	1p22.1	0.0014728
TAGLN2	1q21-q25	0.0014634		LOC283861	16q24.3	0.0021133		INTS9	8p21.1	0.0014741
MIR3945HG	---	0.0015261		CSK	15q24.1	0.0021187		HAS2	8q24.12	0.0014929
FCGR3A	1q23	0.0015701		TSPAN17	5q35.3	0.0021187		DNPH1	6p21.1	0.0015019
HK3	5q35.2	0.0015715		RBMS3	3p24-p23	0.0022242		PRKACB	1p31.1	0.0015068
CNN2	19p13.3	0.0015736		FRAS1	4q21.21	0.0022258		PRPSAP1	17q24-q25	0.0015688
NFE2L2	2q31	0.0015985		FGFR4	5q35.2	0.002265		TAF7	5q31	0.0015787
SDCBP	8q12	0.0016412		KIAA1671	22q11.23	0.0022667		TNC	9q33	0.0015817
PIGL	17p11.2	0.0016489		ADD2	2p13.3	0.0022957		VIP	6q25	0.001592
JUNB	19p13.2	0.0016546		VIL1	2q35	0.0023248		PEBP1	12q24.23	0.0016106
ALDH3A2	17p11.2	0.0016649		HMGCLL1	6p12.1	0.0023597		CAPN1	11q13	0.0016401
LEPROTL1	8p12	0.001668		HMGA1	6p21	0.002435		FADS2	11q12.2	0.001647
HMOX1	22q13.1	0.001753		RPL29	3p21.3-p21.2	0.0024416		SARAF	8p12	0.001703
SRGAP2	1q32.1	0.0017894		SQLE	8q24.1	0.0024464		STEAP1	7q21	0.0017977
LOC101927151	19q11	0.0018039		EPM2AIP1	3p22.1	0.0024669		ATM	11q22-q23	0.0017997
CGNL1	15q21.3	0.0018141		LY6E	8q24.3	0.0024672		ERAP2	5q15	0.0018314
PGM2L1	11q13.4	0.001823		TP53I11	11p11.2	0.0025402		MAF	16q22-q23	0.0018505
PAX8	2q13	0.0018262		FBLIM1	1p36.21	0.0025708		CGRRF1	14q22.2	0.0018522
PAK2	3q29	0.0018544		ALS2CR11	2q33.1	0.0026187		AKAP1	17q22	0.001909
CCSAP	1q42.13	0.0018686		KIAA1109	4q27	0.0026268		DOCK4	7q31.1	0.0019299
ZNF92	7q11.21	0.0018866		GPX1	3p21.3	0.0026506		CREB5	7p15.1	0.0019658
SMAD3	15q22.33	0.0019097		DGKA	12q13.3	0.0027049		EVPL	17q25.1	0.0019692
SOHLH1	9q34.3	0.0019238		SDHC	1q23.3	0.0027172		DLG2	11q14.1	0.0020004
LOXL2	8p21.3	0.0019271		STK10	5q35.1	0.0027338		IL1RAP	3q28	0.0020116
TNK2-AS1	3q29	0.0019609		ICMT	1p36.21	0.0027464		C6orf141	6p12.3	0.002022
ARHGAP26	5q31	0.0019785		MEGF11	15q22.31	0.0028398		DCTN6	8p12	0.0020736
GOLIM4	3q26.2	0.002028		FBXO7	22q12.3	0.0028864		RMDN2	2p22.2	0.0020867
ADAMTSL1	9p21.3	0.0020471		ATG10	5q14.1	0.002916		SP100	2q37.1	0.0021079
NNMT	11q23.1	0.0020672		LOC101927143	---	0.0030051		RB1	13q14.2	0.0021361
GPC1	2q35-q37	0.0021063		UBE2M	19q13.43	0.0030999		DLG5	10q23	0.0022101
PLXNC1	12q23.3	0.0021166		MAPK1	22q11.21	0.0031265		ZEB2	2q22.3	0.0022211
ZNF280D	15q21.3	0.0022196		CD9	12p13.3	0.0032189		SIVA1	14q32.33	0.0022495
SLCO2B1	11q13	0.0023147		RPN1	3q21.3	0.0032737		PTK2	8q24.3	0.0023027
BCL3	19q13.1-q13.2	0.0023255		RPL31	2q11.2	0.0032981		HNMT	2q22.1	0.0023419
CSGALNACT1	8p21.3	0.0023879		FDPS	1q22	0.0033477		ABCA3	16p13.3	0.0023833
CXCL8	4q13-q21	0.0023981		AP5M1	14q22.3	0.0034613		SCG2	2q35-q36	0.0023847
CR1	1q32	0.0023989		LOC100506679	22q13.2	0.0034694		SRPX	Xp21.1	0.0024103
THRA	17q11.2	0.0024197		PAXIP1-AS2	7q36.2	0.0034917		COX2	---	0.0024203
SOCS3	17q25.3	0.0024223		ZC3H14	14q31.3	0.0034969		GPC4	Xq26.1	0.0024276
STARD8	Xq13.1	0.0024308		OGDH	7p14-p13	0.0035125		DAG1	3p21	0.0024582
FCN1	9q34	0.0024491		LOC101928614	---	0.0035299		PITPNC1	17q24.2	0.0024713
ZFP36	19q13.1	0.0024803		PPP1R12A	12q15-q21	0.0035759		TLR4	9q33.1	0.0024985
ZMAT3	3q26.32	0.0024943		RAPGEF2	4q32.1	0.0035876		EML2	19q13.32	0.0025227
SLC25A27	6p12.3	0.0025183		LOC105376944	---	0.0036181		MTG2	20q13.33	0.0025261
ADGRG3	16q21	0.0025204		RSU1	10p13	0.0037861		NR2F1-AS1	5q15	0.0025684
ARSB	5q14.1	0.0025372		TEX9	15q21.3	0.0037996		TMED5	1p22.1	0.0025873
MCTP2	15q26.2	0.0025385		LOC105373547	---	0.0038308		FOXP1	3p14.1	0.0026146
AQP9	15q	0.002539		MUT	6p12.3	0.0038904		MAATS1	3q13.33	0.002636
LOC105371232	---	0.0025558		ZNF280D	15q21.3	0.0039228		SFPQ	16q24.1	0.0026368
EHD2	19q13.3	0.0025567		RPL36A-HNRNPH2	Xq22.1	0.0039408		GTF2E2	8p12	0.0026441
TGFBI	5q31	0.0025622		DAG1	3p21	0.0039764		BCAR3	1p22.1	0.0027267
WASH1	9p24.3	0.0025798		CNTFR	9p13	0.0040344		C21orf33	21q22.3	0.0027735
VNN2	6q23-q24	0.0026154		ZNF84	12q24.33	0.004062		GSTM3	1p13.3	0.0027847
FOSL2	2p23.3	0.0026275		UQCRB	8q22	0.0040955		MAP7	6q23.3	0.0027916
TRAPPC12	2p25.3	0.0026728		CALB1	8q21.3	0.0041155		METTL13	1q24-q25.3	0.0028051
CCDC140	2q36.1	0.0027195		SVIL	10p11.2	0.0041218		ATP6	---	0.0028063
MPP1	Xq28	0.0027266		SEPW1	19q13.3	0.0041332		RTTN	18q22.2	0.002826
SHC1	1q21	0.0027298		PFN1	17p13.3	0.0041889		RAB11FIP2	10q26.11	0.0028447
IDS	Xq28	0.0027658		NDUFS2	1q23	0.0042038		ELK3	12q23	0.00287
AP3S1	5q22	0.0027669		ABCF3	3q27.1	0.0042129		EVI2A	17q11.2	0.0028719
CD14	5q31.1	0.0027846		MSN	Xq11.1	0.0042131		PTPRN2	7q36	0.0029153
TTC3	21q22.2	0.0027926		LOC100505635	6p21.2	0.0042186		LUC7L	16p13.3	0.0029294
VIL1	2q35	0.0028036		ITGB3	17q21.32	0.0042557		NDST1	5q33.1	0.0029406
GAL3ST3	11q13.1	0.0028592		RAD23B	9q31.2	0.004282		PKIA	8q21.12	0.0029577
NBL1	1p36.13	0.0028811		MAFK	7p22.3	0.0042969		PTPN3	9q31	0.0030045
ALDH1A3	15q26.3	0.0029247		LOC401320	7p15.1	0.0043032		PTPRD	9p23-p24.3	0.0030067
RAPGEF5	7p15.3	0.0029382		ZNF140	12q24.33	0.0043165		TNFAIP6	2q23.3	0.0030078
FAM43A	3q29	0.002971		PHTF1	1p13	0.0043516		TCEANC	Xp22.2	0.0030477
SAMHD1	20pter-q12	0.0029801		TRIM13	13q14	0.0043732		SEMA3C	7q21-q31	0.0030973
PLA2G4C	19q13.3	0.002983		ZNF230	19q13.31	0.0043803		SLC2A11	22q11.23	0.0030991
PCDHGA1	5q31	0.0030269		ABHD2	15q26.1	0.004554		RPL32P3	3q21.3	0.0032241
FZD5	2q33.3	0.0030501		LYNX1	8q24.3	0.004595		PAPPA	9q33.2	0.0032676
ARHGEF9	Xq11.1	0.0030547		SIGLEC10	19q13.3	0.0046147		TARBP1	1q42.3	0.0032914
AGFG2	7q22.1	0.0030587		SLC29A1	6p21.1	0.0047345		ZNF12	7p22.1	0.0033059
NR3C1	5q31.3	0.0030824		PLXNC1	12q23.3	0.0047433		ESR1	6q25.1	0.0033281
LARGE-AS1	---	0.0031207		YEATS2	3q27.1	0.004763		S100A13	1q21	0.0033883
MGAT2	14q21	0.0031213		COTL1	16q24.1	0.0047675		TNPO1	5q13.2	0.0034349
FAM53A	4p16.3	0.0031307		SLC7A1	13q12.3	0.0047692		FGF7	15q21.2	0.0034687
PLTP	20q13.12	0.0031417		DNAJB1	19p13.2	0.0047708		KIAA1671	22q11.23	0.0035324
CLDN19	1p34.2	0.0031666		SEPT7P9	10p11.1	0.0047881		A2ML1	12p13.31	0.0035658
MAGI2-IT1	7q21.11	0.0032185		CC2D2A	4p15.32	0.0047906		POLK	5q13	0.0035844
HAS2	8q24.12	0.0032557		ZNF621	3p22.1	0.004849		ATXN2	12q24.1	0.0035961
MS4A4A	11q12	0.0032575		SYNCRIP	6q14-q15	0.0048743		ANOS1	Xp22.32	0.0036013
AP1S2	Xp22.2	0.0032852		ANPEP	15q25-q26	0.0048795		PPP6C	9q33.3	0.0036378
TCOF1	5q32	0.0032877		HDAC5	17q21	0.0049428		COG2	1q42.2	0.0037115
OXSR1	3p22.2	0.0032905		TTL	2q13	0.0049628		LPAR1	9q31.3	0.0037277
BCAR3	1p22.1	0.0033645		MBNL2	13q32.1	0.0050188		SLIT3	5q35	0.0037315
FPGS	9q34.1	0.0034343		MB	22q13.1	0.0050454		KAT2B	3p24	0.0037329
TPCN1	12q24.13	0.0035156		MSX1	4p16.2	0.0050625		AKAP11	13q14.11	0.0037406
PPP1R2	3q29	0.0035358		CCDC150	2q33.1	0.0051414		NUB1	7q36	0.0037502
PPP1R12B	1q32.1	0.0035719		HMGCS1	5p14-p13	0.0051507		AHR	7p15	0.0037668
FOXP1-AS1	3p13	0.003572		TRIM40	6p22.1	0.005304		ADAMTS9	3p14.1	0.0037719
NLRP3	1q44	0.0035801		RPL28	19q13.4	0.0053625		ITGB5	3q21.2	0.003793
YEATS2	3q27.1	0.0036022		NR2C1	12q22	0.0054464		PDS5B	13q12.3	0.0038209
LAPTM5	1p34	0.0036448		PGD	1p36.22	0.0054585		CYP2E1	10q26.3	0.0038708
DBT	1p31	0.0036502		GALK2	15q21.1-q21.2	0.0054748		ZCCHC10	5q31.1	0.0039021
SLC22A23	6p25.2	0.0036661		LYPD8	1q44	0.0055743		NNMT	11q23.1	0.0039263
ADGRE5	19p13.12	0.0037011		MYO18A	17q11.2	0.0056293		GRIA3	Xq25	0.0039279
RTEL1-TNFRSF6B	20q13.3	0.0037025		OPRL1	20q13.33	0.0056345		FCHSD2	11q13.4	0.0039377
TLR4	9q33.1	0.0038439		ADD3	10q25.2	0.0056465		DAZAP2	12q12	0.0039431
SLC25A36	3q23	0.003847		LITAF	16p13.13	0.0056675		PSMA7	20q13.33	0.0039469
HSD11B1	1q32-q41	0.0038797		B4GALNT2	17q21.32	0.00568		UGCG	9q31	0.0039909
PAPPA	9q33.2	0.0039053		ZNF202	11q24	0.0057118		SOCS4	14q22.1	0.004092
BIRC5	17q25	0.003916		GJB3	1p34	0.0057137		S1PR1	1p21	0.0040957
CYR61	1p22.3	0.0039481		APBA1	9q21.12	0.0057171		ZNF202	11q24	0.0041047
ARL4C	2q37.1	0.003971		KMT2B	19q13.1	0.0057238		ABCA1	9q31.1	0.00418
CFAP74	1p36.33	0.0039722		MDFIC	7q31.1-q31.2	0.0057647		ATMIN	16q23.2	0.0042095
STX4	16p11.2	0.0039769		PLA2G4C	19q13.3	0.0058028		CEBPD	8p11.2-p11.1	0.0042646
CCR1	3p21	0.004013		ZNF641	12q13.11	0.005871		NSA2	5q13.3	0.0042733
TNFRSF1B	1p36.22	0.0040227		DEDD	1q23.3	0.005876		FPR1	19q13.4	0.0042853
PPP1R15A	19q13.2	0.0040238		LOC101927523	10q25.1	0.0058855		FGF7	15q21.2	0.0043193
PCYT1A	3q29	0.0040407		SGCB	4q12	0.0058939		PTPRF	1p34	0.004323
CSF2RB	22q13.1	0.0040526		LRIG2	1p13.1	0.0059273		MCM9	6q22.31	0.0043332
DCTN1-AS1	2p13	0.0040661		MYO1E	15q22.2	0.0059813		LYZ	12q15	0.0043375
TMEM109	11q12.2	0.0041239		NBEAL2	3p21.31	0.0059902		SLFNL1	1p34.2	0.0043835
ANHX	12q24.33	0.0041382		ARHGAP27	17q21.31	0.0060115		TFIP11	22q12.1	0.0043868
LOC101928614	---	0.0041431		SFXN5	2p13	0.0060229		DCAF13	8q22.3	0.0044106
CEBPD	8p11.2-p11.1	0.0041438		WFDC8	20q13.12	0.0061878		HLA-DQA1	6p21.3	0.0044441
LOC100507600	---	0.0041775		CCDC34	11p14.1	0.0062675		NRCAM	7q31	0.004451
COL1A1	17q21.33	0.0041841		NR3C2	4q31.1	0.006289		NPAS3	14q13.1	0.0046169
IQGAP1	15q26.1	0.0042669		SP100	2q37.1	0.0062902		CYB5B	16q22.1	0.0046284
ZYX	7q32	0.0042849		FADS2	11q12.2	0.0063818		MAP4K4	2q11.2-q12	0.0046691
NADSYN1	11q13.4	0.0042879		B4GALT1	9p13	0.006396		CHD4	12p13	0.0047275
SLC35G3	17q12	0.0042895		BAIAP2	17q25	0.0064117		CHKA	11q13.2	0.0047289
ABHD2	15q26.1	0.0043145		CACNA1A	19p13	0.0064201		ARID4A	14q23.1	0.0047306
GCLM	1p22.1	0.0043515		ALAS1	3p21.1	0.0064349		ALDH1L2	12q23.3	0.0047368
RELB	19q13.32	0.0043556		CEP112	17q24.1	0.006491		OCA2	15q	0.0048004
RASA3	13q34	0.004486		HMCN2	9q34.11	0.0065168		DCLK1	13q13	0.0048482
ADGRG1	16q21	0.004496		ZAK	2q24.2	0.0065695		DAPK2	15q22.31	0.0048696
ZNF43	19p13.1-p12	0.0045355		CELSR1	22q13.3	0.0066976		TRIP12	2q36.3	0.0048987
RALB	2q14.2	0.0045433		PKN1	19p13.12	0.0067531		GOLIM4	3q26.2	0.0049081
TSPAN17	5q35.3	0.0045467		TRIM36	5q22.3	0.0068067		PPP5D1	---	0.0049662
SVEP1	9q32	0.0045516		FGD6	12q22	0.0068277		NDUFA7	19p13.2	0.0050139
COQ10B	2q33.1	0.0045715		LOC100287290	3q25.32	0.0068685		STK24	13q31.2-q32.3	0.0050162
MAP3K3	17q23.3	0.0045725		MAPK12	22q13.33	0.0068758		FEZ2	2p21	0.005045
DDX3X	Xp11.3-p11.23	0.0045734		MTAP	9p21	0.0068923		MYL12A	18p11.31	0.0050845
WDR1	4p16.1	0.0045873		WIPI1	17q24.2	0.006945		TMEM135	11q14.2	0.0050943
SCOC-AS1	4q31.1	0.0045984		LOC100132077	9q22.32	0.006974		NEK1	4q33	0.0051165
KRT75	12q13	0.0046176		LSAMP	3q13.31	0.00699		DCN	12q21.33	0.0051198
MMP19	12q14	0.0046297		SLC19A1	21q22.3	0.0070093		ADAMTSL1	9p21.3	0.0051586
EDEM1	3p26.1	0.0046744		IL4R	16p12.1-p11.2	0.0070454		YPEL2	17q22	0.0051733
WASF3	13q12	0.0046945		ALDH3B1	11q13	0.0070798		RPN1	3q21.3	0.0051839
VSIG4	Xq12-q13.3	0.0047113		CD82	11p11.2	0.0071719		MYNN	3q26.2	0.005207
MAP3K6	1p36.11	0.0047537		C1orf43	1q21.2	0.0071913		SNU13	22q13	0.0052991
GRIA3	Xq25	0.004777		MACC1	7p21.1	0.0072377		IL6	7p21	0.0053247
PSMF1	20p13	0.0047907		CNPPD1	2q35	0.00725		TNFRSF10B	8p22-p21	0.0053499
LPAR1	9q31.3	0.004799		PVRL2	19q13.2	0.0072691		PPIP5K2	5q21.1	0.0053574
PRKAR1A	17q24.2	0.0048096		SNAPC1	14q22	0.0072818		FKBP15	9q32	0.0053872
LOC101927870	---	0.0048114		LOC101927849	---	0.0072834		MCPH1	8p23.1	0.005451
CALHM3	10q24.33	0.0048406		CSTF2	Xq22.1	0.0072844		SIX3	2p21	0.0054563
ENO3	17p13.2	0.0048408		SMS	Xp22.1	0.007294		KEAP1	19p13.2	0.0055401
DGKB	7p21.2	0.0049012		TPMT	6p22.3	0.0072954		MFSD6L	17p13.1	0.005576
NMNAT2	1q25	0.0050098		LINC01505	9q31.2	0.0073399		CH25H	10q23	0.0056814
WNK1	12p13.3	0.0050462		BCAP29	7q22.3	0.0073421		SOBP	6q21	0.0057794
PHF20L1	8q24.22	0.0050635		HAVCR2	5q33.3	0.0073807		NT5E	6q14-q21	0.0057977
IL6	7p21	0.0050754		LINC01333	5q13.3	0.0073944		HBEGF	5q23	0.0058151
ELL	19p13.1	0.0050909		RPS27	1q21	0.0074019		FNDC3A	13q14.2	0.0058336
C15orf38-AP3S2	15q26.1	0.0051042		LOC100507600	---	0.0074146		TIMM44	19p13.2	0.0058451
PLEK	2p13.3	0.005131		PSMB2	1p34.2	0.0074594		CSRNP3	2q24.3	0.0058679
FRYL	4p11	0.0051329		DUSP4	8p12-p11	0.0075002		SEMA5A	5p15.2	0.005889
GPR4	19q13.3	0.0052337		LOC105369167	---	0.0075864		LCMT2	15q15.3	0.0058979
SQSTM1	5q35	0.0052363		TYMP	22q13.33	0.0076295		GJA1	6q22.31	0.0059531
GALC	14q31	0.0052364		PSEN1	14q24.3	0.0076449		C11orf57	11q23.1	0.0059593
CD84	1q24	0.0052382		TTC3	21q22.2	0.0077926		LOC100310756	8q24.3	0.0059609
WIPF1	2q31.1	0.0052626		LOC101928298	10p14	0.0077962		LPAR6	13q14	0.0059709
SLC35F6	2p23.3	0.0052974		ZNF107	7q11.2	0.0077971		FOXO1	13q14.1	0.0060114
AK7	14q32.2	0.0053146		PMVK	1q22	0.0078062		POLH	6p21.1	0.0060505
SLC6A6	3p25.1	0.0053631		ZNF277	7q31.1	0.0078638		TRIM13	13q14	0.0060634
INPP1	2q32	0.0053715		IDS	Xq28	0.0078952		BCHE	3q26.1-q26.2	0.0060684
FGFR4	5q35.2	0.0053791		CLYBL-IT1	---	0.0080103		TUBB2A	6p25	0.0060836
C14orf105	14q22.3	0.0054788		ZCCHC7	9p13.2	0.0080152		GULP1	2q32.3-q33	0.0062047
GPX1	3p21.3	0.0054794		ACTR3	2q14.1	0.008031		TIMD4	5q33.3	0.006371
LOC100506585	---	0.0054981		TFIP11	22q12.1	0.0080926		MOB4	2q33.1	0.0064644
FRMPD1	9p13.2	0.0055094		SCRN3	2q31.1	0.0081352		TNF	6p21.3	0.0065786
MAP2K1	15q22.1-q22.33	0.0055197		MKL1	22q13	0.0081422		GPR173	Xp11	0.0065825
LRRFIP1	2q37.3	0.0055313		LRP11	6q25.1	0.0081786		ADD3	10q25.2	0.0066019
ICAM1	19p13.3-p13.2	0.0055325		SPPL3	12q24.31	0.0082725		STAT2	12q13.3	0.0066523
MAN1A2	1p13	0.0055738		PLK3	1p34.1	0.0083158		C11orf54	11q21	0.0067106
C15orf39	15q24.2	0.0055997		TTBK2	15q15.2	0.0083247		LAYN	11q23.1	0.0067708
JAK1	1p32.3-p31.3	0.0056053		RPL11	1p36.1-p35	0.0084788		TRIM14	9q22.33	0.0067963
NT5E	6q14-q21	0.0056146		MPZL3	11q23.3	0.0085125		PDGFRL	8p22-p21.3	0.0068044
C2CD2L	11q23.3	0.0056264		ZNF12	7p22.1	0.0085154		S100Z	5q13.3	0.006807
PAX5	9p13	0.0056389		GTPBP1	22q13.1	0.0085402		PARN	16p13	0.0068119
CAPNS1	19q13.12	0.0056546		TNFRSF11A	18q22.1	0.0085713		KPNA1	3q21	0.0068682
HLA-E	6p21.3	0.0056672		RAB7A	3q21.3	0.0086544		GIGYF2	2q37.1	0.0068697
VAV1	19p13.3	0.0057171		DVL3	3q27	0.0087606		DSE	6q22	0.0069077
DSE	6q22	0.0057682		PPIP5K2	5q21.1	0.008769		HOXD1	2q31.1	0.0069187
LOC101927865	2q33.3	0.0057893		HOXB5	17q21.3	0.008773		UTP14C	13q14.2	0.0069279
MAP4K4	2q11.2-q12	0.0058041		MTERF4	2q37.3	0.0087763		B3GALNT2	1q42.3	0.0069284
GNPAT	1q42	0.0058145		HMCES	3q21.3	0.0088409		S100A1	1q21	0.0069555
SUSD6	14q24.1	0.0058231		B3GNT7	2q37.1|2q37.1	0.0089118		KIF13B	8p12	0.0069806
LINC00632	Xq27.1	0.0058239		2018-03-10	17q23.2	0.0089122		FLI1	11q24.1-q24.3	0.0069948
OR5J2	11q11	0.0058323		KRIT1	7q21.2	0.0089322		PRLR	5p13.2	0.0070628
ZNF286A	17p11.2	0.0058407		SLC2A11	22q11.23	0.0089386		SCIN	7p21.3	0.0071339
PITPNC1	17q24.2	0.0058514		PFKL	21q22.3	0.0089559		LOC401320	7p15.1	0.0071371
POU6F1	12q13.13	0.0059507		LINC01588	14q21.3	0.0089649		PIEZO2	18p11.22	0.0071677
FAM212B	1p13.2	0.0059687		FBF1	17q25.1	0.0090595		PDE7A	8q13	0.0072008
CXorf36	Xp11.3	0.0059748		MACC1	7p21.1	0.009107		CEP120	5q23.2	0.0072192
DPP4	2q24.3	0.005989		REL	2p13-p12	0.0091336		CREB1	2q34	0.0072664
ADCY7	16q12.1	0.0060038		STX6	1q25.3	0.0091479		STARD8	Xq13.1	0.0072766
MINA	3q11.2	0.0060152		HM13	20q11.21	0.0092166		HDX	Xq21.1	0.0072821
RIMS1	6q12-q13	0.0060707		SRGAP3	3p25.3	0.0092181		MMEL1	1p36	0.0072914
LMO1	11p15	0.0061164		PTP4A1	6q12	0.0092317		RECK	9p13.3	0.0073429
CFAP157	9q34.11	0.006221		ATP7A	Xq21.1	0.0092562		CFI	4q25	0.0073612
SGSH	17q25.3	0.0062217		SHC3	9q22.1	0.0094133		IRAK1	Xq28	0.0073715
PLXNA4	7q32.3	0.0062366		AREL1	14q24.3	0.009451		SDHD	11q23	0.0074042
CD99	Xp22.32 and Yp11.3	0.0062442		GPATCH11	2p22.2	0.0095013		VNN2	6q23-q24	0.0074258
KCNN3	1q21.3	0.0063155		USP36	17q25.3	0.0095021		RGS3	9q32	0.0074405
LRRC6	8q24.22	0.0063326		GCLM	1p22.1	0.0095138		LEPROTL1	8p12	0.0075007
ZNF85	19p12	0.0063445		SMPD2	6q21	0.0095205		ICAM2	17q23.3	0.0075807
SCG2	2q35-q36	0.0063774		SMARCA1	Xq25	0.0095748		ZPR1	11q23.3	0.007607
ACTR3B	7q36.1	0.0064419		ARF6	14q21.3	0.0096071		B9D1	17p11.2	0.0076124
SLC11A1	2q35	0.0064806		ZNF26	12q24.33	0.0096525		LOC100130950	17p13.2	0.0076163
IRAK2	3p25.3	0.0064891		SNU13	22q13	0.0097466		CDC42BPB	14q32.3	0.007635
LOC100129455	2q31.1	0.0065302		SSH1	12q24.11	0.0097657		RECQL4	8q24.3	0.0076644
ATG10	5q14.1	0.0066147		SERP2	13q14.11	0.0098196		ABL1	9q34.1	0.0077249
PRM1	16p13.2	0.0066176		BAG6	6p21.3	0.0098336		BDKRB2	14q32.1-q32.2	0.0077405
KLHL4	Xq21.3	0.0066559		IL17RA	22q11.1	0.0098617		FMO1	1q24.3	0.0077573
TNFSF9	19p13.3	0.0066767		LOC101927657	8q24.21	0.0098662		RAB4A	1q42-q43	0.0077667
GNA13	17q24.3	0.0066815		MAP3K8	10p11.23	0.0099297		ANK2	4q25-q27	0.0077857
TBX2	17q23.2	0.0066893		FBXO18	10p15.1	0.010017		PCDHGA1	5q31	0.0078031
KLF9	9q13	0.0067054		ATMIN	16q23.2	0.010019		ZC3H14	14q31.3	0.007812
ZNF70	22q11.23	0.0067258		ELF4	Xq26	0.0100555		ZNF548	19q13.43	0.0078589
HBEGF	5q23	0.0067271		CAPN1	11q13	0.0100678		ANKRD13C	1p31.1	0.0079001
SMTN	22q12.2	0.0067309		CD63	12q12-q13	0.0100741		ING3	7q31	0.0079063
FGD2	6p21.2	0.0067691		ADGRL1	19p13.2	0.0101132		DNAH6	2p11.2	0.0079225
CFHR2	1q31.3	0.0067899		RBMX	Xq26.3	0.0101214		SETD5	3p25.3	0.0079303
HOXC5	12q13.3	0.0067952		ADGRG1	16q21	0.0101493		VRK3	19q13	0.0079506
ARL4D	17q21.31	0.0068092		TMEM192	19q13.41	0.01016		CDC42BPA	1q42.11	0.0080117
ITGB4	17q25	0.0068407		COPS8	2q37.3	0.0101644		BCL10	1p22	0.0080181
VPS53	17p13.3	0.0068925		PTPN18	2q21.1	0.010171		CCL13	17q11.2	0.0080233
NLRC4	2p22.3	0.0068966		IFT122	3q21	0.0101906		SEL1L	14q31	0.0080589
FCGR3B	1q23	0.0069535		AAK1	2p14	0.0102392		CHL1	3p26.1	0.00807
NAGA	22q11	0.0069786		IER2	19p13.2	0.0102515		XRCC4	5q14.2	0.0080834
KPNA1	3q21	0.0070145		CEP57	11q21	0.0102852		CD163	12p13.3	0.0080978
GAS6	13q34	0.0070202		TREML3P	6p21.1	0.0103671		PER2	2q37.3	0.0081019
NRP1	10p12	0.0070542		TTC37	5q15	0.010386		XIAP	Xq25	0.0081469
SLC8A3	14q24.1	0.007093		NCOA7	6q22.32	0.0105154		SKIL	3q26	0.0081477
GSTA4	6p12.1	0.0070938		COX2	---	0.0105302		GLIPR1	12q21.2	0.0082282
IL1B	2q14	0.0071272		ID2	2p25	0.010535		LOC105373113	---	0.0082323
TNFAIP1	17q22-q23	0.0071572		EVPL	17q25.1	0.0105535		CHDH	3p21.1	0.0082425
LACC1	13q14.11	0.0071733		RPL32	3p25-p24	0.0105833		MBNL1	3q25	0.0082763
SH2B3	12q24	0.0072377		CSPP1	8q13.2	0.0106155		ACVR1	2q23-q24	0.0082973
ENPEP	4q25	0.007275		CECR9	---	0.0106261		ST8SIA4	5q21	0.0083285
DAPK3	19p13.3	0.0072819		WNT4	1p36.23-p35.1	0.0106431		PBX1	1q23	0.0083341
ZNF396	18q12	0.0072932		ZNF135	19q13.4	0.0106917		MIER3	5q11.2	0.008336
PROM2	2q11.1	0.0073256		RNF130	5q35.3	0.0107387		SESN3	11q21	0.0083456
FLJ37786	1q21	0.007335		RPS6KA2	6q27	0.0107418		CCNB2	15q22.2	0.0084652
CD63	12q12-q13	0.0073452		HDAC4	2q37.3	0.0107558		HSF2BP	21q22.3	0.0084754
LRP1	12q13.3	0.0073516		CLIP1	12q24.3	0.0107874		ACVR2A	2q22.3	0.0085729
LRRC25	19p13.11	0.0073794		TMEM184A	7p22.3	0.0107975		VGLL1	Xq26.3	0.0086289
EHBP1L1	11q13.1	0.00738		ADCY7	16q12.1	0.0108475		SLC2A3	12p13.3	0.0086432
TMEM37	2q14.2	0.0073808		CDK8	13q12	0.0108548		CBR3	21q22.2	0.0086728
ITPR2	12p11	0.0073835		ITGB4	17q25	0.0109497		TRIM23	5q12.3	0.0087975
PKD1	16p13.3	0.0074074		LMNA	1q22	0.01099		F3	1p22-p21	0.0088189
ADAM8	10q26.3	0.0074141		TMEM171	5q13.2	0.0110035		PLN	6q22.1	0.0088499
RNF165	18q21.1	0.0074199		TRIM25	17q23.2	0.011023		RAD21	8q24	0.0088656
NOS3	7q36	0.0074279		ENO1	1p36.2	0.011044		OR5P3	11p15.4	0.0088818
LINC00907	18q12.3	0.0074491		USP49	6p21	0.0111016		UGDH	4p15.1	0.0088822
AP2M1	3q28	0.0074495		SBNO2	19p13.3	0.0111776		CUL5	11q22.3	0.0089218
NME5	5q31	0.0074502		DRAXIN	1p36.22	0.0112201		KYNU	2q22.2	0.0089968
ABL1	9q34.1	0.0074547		ITGAX	16p11.2	0.0112413		SERPINE1	7q22.1	0.0090268
CADM2	3p12.1	0.0075112		MAP4	3p21	0.0112504		SUPT7L	2p23.3	0.0091298
GNG12	1p31.3	0.0075591		LRRC38	1p36.21	0.0112776		DCAF8	1q22-q23	0.0091412
ATP6V1B2	8p21.3	0.0076196		RBM15	1p13	0.0113237		LOC101927809	---	0.0091417
S1PR1	1p21	0.0076778		ELFN2	22q13.1	0.0113598		ANKRD30B	18p11.21	0.0091638
KAT2A	17q21	0.0077187		MORC2	22q12.2	0.0113715		ZBTB38	3q23	0.0091977
BDKRB2	14q32.1-q32.2	0.0077643		CADM2	3p12.1	0.0114164		ZNF277	7q31.1	0.009276
ADARB1	21q22.3	0.0077691		RAB42	1p35.3	0.0114273		CTSC	11q14.2	0.0092779
TBC1D9B	5q35.3	0.0077761		LMAN1	18q21.3-q22	0.0114535		BAHD1	15q15.1	0.0092832
IFNGR1	6q23.3	0.0078056		RPS3A	4q31.2-q31.3	0.0114962		MCL1	1q21	0.0093076
KCNK15	20q13.12	0.0078768		NRP1	10p12	0.0115188		MTAP	9p21	0.0093301
KCNJ2	17q24.3	0.0079144		CYP4F35P	18p11.21	0.0116235		PGLS	19p13.2	0.0093378
KIF23	15q23	0.0079366		FH	1q42.1	0.0116736		MARCKS	6q22.2	0.0093447
E2F4	16q22.1	0.0079466		RASAL2	1q24	0.0116914		HDAC4	2q37.3	0.0093684
GRK6	5q35	0.0079643		ITGB1	10p11.2	0.0117424		LOC101928307	6q12	0.0093896
TMC6	17q25.3	0.008002		PRKCA	17q22-q23.2	0.0117472		LOC100291323	---	0.0093913
PLCB4	20p12	0.008014		TRPC1	3q23	0.0118165		LEPR	1p31	0.0093969
RPL36A-HNRNPH2	Xq22.1	0.0080166		SREBF2	22q13	0.0118249		PHLDB2	3q13.2	0.0094374
WIPI1	17q24.2	0.0080388		COG5	7q31	0.0118259		HOXC5	12q13.3	0.0094377
CYBB	Xp21.1	0.0080527		TCF4	18q21.1	0.0118477		PTPRE	10q26	0.0094726
ST3GAL2	16q22.1	0.0080617		ILVBL	19p13.1	0.011871		KAT6B	10q22.2	0.0094868
LOC105372953	---	0.0081411		ARHGAP26	5q31	0.0118785		SNRK	3p22.1	0.0095285
ZNF26	12q24.33	0.0081497		MT1G	16q13	0.0119002		RAPGEF6	5q31.1	0.0095734
SFXN5	2p13	0.008207		RUSC1	1q21-q22	0.0119495		BNIPL	1q21.3	0.0095842
TNFAIP6	2q23.3	0.008214		MBNL1	3q25	0.0119568		IL27RA	19p13.11	0.0095922
TCIRG1	11q13.2	0.0082325		INIP	9q32	0.0120021		LUM	12q21.33	0.0096053
RPS6KA3	Xp22.2-p22.1	0.0082412		HNRNPLL	2p22.1	0.012006		PPP2R5E	14q23.1	0.009633
ORAI2	7q22.1	0.008253		LOC105369477	---	0.012093		F13A1	6p25.3-p24.3	0.009645
PDE6A	5q31.2-q34	0.0083371		UNC119	17q11.2	0.0121388		TMTC4	13q32.3	0.0096536
GBF1	10q24	0.0083797		CTU2	16q24.3	0.0121389		GK5	3q23	0.0096764
CMTM6	3p22.3	0.0084423		KIF5B	10p11.22	0.0121886		GIN1	5q21.1	0.0096966
SLAMF9	1q23.2	0.0084708		HNRNPF	10q11.21	0.0122927		IRF2	4q34.1-q35.1	0.0097038
MDM2	12q14.3-q15	0.0084711		CCNY	10p11.21	0.0123541		LRRC25	19p13.11	0.0097202
SOX6	11p15.3	0.0085031		MAP3K13	3q27	0.0124147		HS3ST3B1	17p12	0.0097285
FGF18	5q34	0.0085917		VSTM2A	7p11.2	0.0124344		CD86	3q21	0.0097451
DUSP3	17q21	0.0086289		LGALS7	19q13.2	0.01245		KANSL1L	2q34	0.0097588
LYN	8q13	0.0086506		USP13	3q26.2-q26.3	0.0124769		TERF1	8q21.11	0.0097651
SLC20A1	2q13	0.0086852		MTF1	1p33	0.012505		DIO1	1p33-p32	0.0098051
LIMS1	2q12.3	0.0086915		TCAF2	7q35	0.0125353		SCG5	15q13-q14	0.0098354
TIGD1	2q37.1	0.008703		LOC400927-CSNK1E	22q13.1	0.0125762		FAM69A	1p22.1	0.0098779
TREML3P	6p21.1	0.0087576		SLAMF9	1q23.2	0.0126063		MAN2A1	5q21.3	0.0098842
FCGR2A	1q23	0.0087733		TTLL3	3p25.3	0.0126372		ZADH2	18q22.3	0.0098963
TGFBRAP1	2q12.1	0.0087909		CIB1	15q25.3-q26	0.0126469		TPST2	22q12.1	0.0099089
ZNF493	19p12	0.0088091		ZNF709	19p13.2	0.0126588		MIER1	1p31.3	0.0099316
LOC105369434	---	0.0088847		ADNP2	18q23	0.0127144		LRMP	12p12.1	0.0099776
PDGFA	7p22	0.0089113		HSP90B1	12q24.2-q24.3	0.0127879		ABCC5	3q27	0.0099812
RPRD1A	18q12.2	0.0089196		ATP6V1C1	8q22.3	0.0128054		CLN6	15q23	0.0100075
PCOLCE	7q22	0.0089721		LDLR	19p13.2	0.0128732		PHKA1	Xq12-q13	0.0100488
SEC62	3q26.2	0.0090038		TSPEAR-AS2	21q22.3	0.0129101		TWIST2	2q37.3	0.0100494
CTSB	8p22	0.0090418		NPAS2	2q11.2	0.0129948		PCDH7	4p15	0.0100503
EHD4	15q11.1	0.0090544		DR1	1p22.1	0.0130095		FBXO42	1p36.23-p36.11	0.0101484
PIANP	12p13.31	0.0090742		ERH	14q24.1	0.0130149		DST	6p12.1	0.010156
CTBP2	10q26.13	0.0090902		ST5	11p15	0.0130195		PDHA1	Xp22.1	0.0102322
TAS2R40	7q34	0.0091223		ANKRD13C	1p31.1	0.0130215		SCARA5	8p21.1	0.0102416
SREK1IP1	5q12.3	0.0091431		GPC4	Xq26.1	0.0130352		PDE4DIP	1q12	0.0102736
ITGA11	15q23	0.0092371		SESN3	11q21	0.0130475		HIF1A	14q23.2	0.0103734
MCTP1	5q15	0.0093393		BCL3	19q13.1-q13.2	0.0130503		PRRX1	1q24	0.0103849
MAGEE1	Xq13.3	0.0093405		FBXO39	17p13.1	0.0131431		ARHGEF15	17p13.1	0.0104216
MAP3K8	10p11.23	0.0094037		ALG13	Xq23	0.0131629		ETS2	21q22.2	0.0104397
TRAFD1	12q	0.0094139		CWF19L2	11q22.3	0.0131758		SFRP4	7p14.1	0.0104828
SNRK	3p22.1	0.0094488		RPP14	3p14.3	0.0132411		STX6	1q25.3	0.0104983
ADGRB1	8q24.3	0.0094508		MST1R	3p21.3	0.0132614		ZNF496	1q44	0.0105387
TNFRSF10A	8p21	0.0095013		NRG1	8p12	0.0132622		IL1B	2q14	0.0105529
STOML1	15q24.1	0.0096008		ARHGAP1	11p11.2	0.0133286		XYLB	3p22-p21.3	0.0105703
CUL4B	Xq23	0.009602		ZFP37	9q32	0.0133437		LOC105370792	---	0.0106063
PHACTR2	6q24.2	0.0096273		C2CD2L	11q23.3	0.0133652		RBMS3	3p24-p23	0.0108577
ATP6V0E1	5q35.1	0.0096352		TRPM3	9q21.12	0.0134599		FBXO9	6p12.3-p11.2	0.0108732
RPS6KA2	6q27	0.009645		KMT2A	11q23	0.0134918		TACC1	8p11.22	0.0109014
CD68	17p13	0.0096506		RUBCN	3q29	0.0135187		HDAC9	7p21.1	0.010909
RNF13	3q25.1	0.009658		VPS11	11q23	0.0135741		ATG12	5q21-q22	0.0109723
TNFSF10	3q26	0.0097204		ANHX	12q24.33	0.0135759		APP	21q21.3	0.0110532
GPRIN3	4q22.1	0.0097372		CEP78	9q21.2	0.0136108		SYTL3	6q25.3	0.0110532
MALAT1	11q13.1	0.0097404		LINC00857	10q22.3	0.0136713		ITM2A	Xq13.3-Xq21.2	0.011059
FHL2	2q12.2	0.0097618		CFL1	11q13	0.0137663		RAB21	12q21.1	0.0110802
PLXND1	3q22.1	0.009769		ATG13	11p11.2	0.0137936		IL13RA2	Xq23	0.0110846
C12orf74	12q22	0.0097825		LRRC7	1p31.1	0.01381		EHHADH	3q26.3-q28	0.0110975
LMF1	16p13.3	0.0098145		PRKCD	3p21.31	0.013855		LDB2	4p16	0.0111018
SBNO2	19p13.3	0.0098672		PDK1	2q31.1	0.0139239		WNK1	12p13.3	0.0111042
CD2BP2	16p11.2	0.0099788		TARDBP	1p36.22	0.0139509		CWF19L2	11q22.3	0.0111559
RHOBTB2	8p21.3	0.0099796		AP1B1	22q12.2	0.0140388		TXNL4A	18q23	0.0111629
ILK	11p15.4	0.010017		SLC25A36	3q23	0.0140714		HHEX	10q23.33	0.0112071
IFI16	1q22	0.010024		IQGAP1	15q26.1	0.0140935		ALS2CR11	2q33.1	0.0112386
FGD6	12q22	0.0100266		SLC35G3	17q12	0.0141006		KMT2A	11q23	0.0112405
LOC105379704	---	0.0100413		PIGL	17p11.2	0.0141304		UBA6	4q13.2	0.0112567
DAB2	5p13.1	0.0100698		IRAK1BP1	6q14-q15	0.0141629		PPM1A	14q23.1	0.0112719
TNFRSF10B	8p22-p21	0.01009		ARF1	1q42	0.0142566		THBD	20p11.2	0.0113046
RELA	11q13	0.0100922		NCOR1	17p11.2	0.0142686		KHK	2p23.3	0.0113816
CUBN	10p12.31	0.0101091		TMTC3	12q21.32	0.0142728		MTBP	8q24.12	0.0114107
TLL1	4q32.3	0.01022		GATA4	8p23.1-p22	0.0142744		NOV	8q24.1	0.0114274
MAPRE1	20q11.1-q11.23	0.0102623		ALDOA	16p11.2	0.0142953		IBA57	1q42.13	0.0114915
PLA2G4E-AS1	15q15.1	0.0103416		PSMD2	3q27.1	0.0143067		EDNRB	13q22	0.0115085
AFF4	5q31	0.0103702		CTSD	11p15.5	0.0144167		SMAD5	5q31	0.0115288
FST	5q11.2	0.0104049		RHOG	11p15.5-p15.4	0.0144174		ZNF254	19p12	0.0115712
ELK3	12q23	0.0104166		LOC101928632	---	0.0144231		ZDHHC14	6q25.3	0.0115946
NCF4	22q13.1	0.0104759		ADAM8	10q26.3	0.0144269		PLTP	20q13.12	0.0116658
UBB	17p12-p11.2	0.0104822		TOR1AIP2	1q25.2	0.0144659		TOM1L1	17q23.2	0.0117119
MAFK	7p22.3	0.0104948		RTEL1-TNFRSF6B	20q13.33	0.0145764		OGDH	7p14-p13	0.0117204
FGFR2	10q26	0.0105086		MEX3C	18q21.2	0.0146455		RUNX1	21q22.3	0.0117516
ITGB3	17q21.32	0.0105701		CYTH1	17q25	0.0146997		LRRC6	8q24.22	0.011752
OR10A4	11p15.4	0.0105932		EMID1	22q12.2	0.014738		CD9	12p13.3	0.0118186
DEPDC1-AS1	---	0.0106105		EFCAB14	1p33	0.0147443		CST1	20p11.21	0.0118418
ACSL4	Xq22.3-q23	0.0106169		TUBA1B	12q13.12	0.0147608		DENND1B	1q31.3	0.0118515
FBLN1	22q13.31	0.010622		EHBP1L1	11q13.1	0.0147773		SCN8A	12q13	0.0118583
SORBS2	4q35.1	0.0106254		PCBP2	12q13.13	0.0148024		CDKAL1	6p22.3	0.0118612
RUNX1	21q22.3	0.0107044		LINGO1-AS2	15q24.3	0.0148777		GPR4	19q13.3	0.0118731
CD209	19p13	0.0107598		ZC3H12C	11q22.3	0.0148786		DNAJB9	7q31|14q24.2-q24.3	0.0118749
C2CD3	11q13.4	0.0108457		RANGAP1	22q13	0.0148993		PAK2	3q29	0.0119496
RAB34	17q11.2	0.0108472		PARVB	22q13.2-q13.33	0.0149675		INPP4B	4q31.21	0.0119575
IRF2	4q34.1-q35.1	0.0109128		LINC00841	10q11.21	0.0150359		ANTXR2	4q21.21	0.0120029
GATA4	8p23.1-p22	0.0109495		ACVR2B	3p22	0.0150498		KLF7	2q32	0.0120875
UQCRB	8q22	0.0109566		C15orf38-AP3S2	15q26.1	0.0150565		FST	5q11.2	0.0121119
NBPF3	1p36.12	0.0109632		TMCO4	1p36.13	0.0150566		C5orf24	5q31.1	0.0121461
CD40	20q12-q13.2	0.0109801		PML	15q22	0.0150671		TSC22D3	Xq22.3	0.0121889
CALY	10q26.3	0.010982		LOC101928845	---	0.0150743		CLCA2	1p22.3	0.0122028
OFCC1	6p24.3	0.0109955		SLC2A5	1p36.2	0.0151231		KRBA2	17p13.1	0.0122094
ALOX5	10q11.2	0.0109988		SLC1A2	11p13-p12	0.0151597		PXK	3p14.3	0.0122369
PRRG1	Xp21.1	0.0110472		ZNF398	7q36.1	0.0151794		DIEXF	1q32.2	0.0122746
LOC105369167	---	0.0110576		S100A3	1q21	0.0151926		ZMYM4	1p32-p34	0.0122853
RASEF	9q21.32	0.0110762		EME2	16p13.3	0.0152077		HDGFRP3	15q25.2	0.0123014
TYROBP	19q13.12	0.011104		MCMDC2	8q13.1	0.0152855		TRIM21	11p15.5	0.0123675
CAPZA2	7q31.2-q31.3	0.0111868		LRRC28	15q26.3	0.0152886		SDHC	1q23.3	0.0123964
EMILIN1	2p23.3-p23.2	0.0112007		SEMA3B	3p21.3	0.0153074		BRE-AS1	2p23	0.0124356
RPP14	3p14.3	0.0112715		DGAT1	8q24.3	0.0153982		RPS23	5q14.2	0.0124421
CDK8	13q12	0.0112797		ZFP36L2	2p22.3-p21	0.0154291		SCARF1	17p13.3	0.0124672
LINC00662	19q11	0.011306		ZNF585A	19q13.12	0.0154408		PTX3	3q25	0.012472
CELF1	11p11	0.0113066		EML4	2p21	0.0155708		SQLE	8q24.1	0.0124868
LOC101928760	---	0.0113306		LOC285097	2q37.3	0.0157314		AP3S1	5q22	0.0125081
STX5	11q12.3	0.0113384		MIS18BP1	14q21.2	0.0157912		HMGA1	6p21	0.0125716
PLGLB1	2p11.2	0.0114171		CNOT7	8p22-p21.3	0.0158189		LOC105375839	---	0.0125949
PTPN1	20q13.1-q13.2	0.0114209		INTS6	13q14.3	0.0158827		FBN1	15q21.1	0.0125989
RHBDL3	17q11.2	0.0114367		RB1	13q14.2	0.0159049		ARHGEF2	1q21-q22	0.0126275
HLA-DQA1	6p21.3	0.0114429		FLOT2	17q11.2	0.0159515		PLA2G2A	1p35	0.0126983
PECAM1	17q23.3	0.0114795		CCDC88A	2p16.1	0.015952		BACH1	21q22.11	0.0126986
GABRA2	4p12	0.0115515		PCYT1A	3q29	0.0159811		CYR61	1p22.3	0.0127302
MSN	Xq11.1	0.0115655		TMEM182	2q12.1	0.0159947		ACO1	9p21.1	0.01274
IRAK1BP1	6q14-q15	0.0116074		RELB	19q13.32	0.0159975		KAT2A	17q21	0.0127456
HLA-DRB1	6p21.3	0.0116491		LINC00343	13q33.2	0.0160267		TTLL5	14q24.3	0.0128433
EXD3	9q34.3	0.0117482		WDR1	4p16.1	0.016072		CIRBP-AS1	19p13.3	0.0128545
MRPL57	13q12.11	0.0117932		COX1	---	0.0160743		PHF20L1	8q24.22	0.0128926
JARID2	6p24-p23	0.0118123		EIF3C	16p11.2	0.0161077		DACH1	13q22	0.0129311
LOC105372779	---	0.0118279		LOC101928841	13q34	0.0161314		CCSAP	1q42.13	0.0129359
FAN1	15q13.2-q13.3	0.011849		LOC105373113	---	0.0163193		TRAP1	16p13.3	0.0129639
VAMP5	2p11.2	0.0119113		LINC01127	2q12.1	0.0163299		PGD	1p36.22	0.0129693
MGC57346	17q21.31	0.0119496		MRPS12	19q13.1-q13.2	0.0163575		CDC14A	1p21	0.0129744
TSPEAR-AS2	21q22.3	0.0119852		ALDOB	9q21.3-q22.2	0.0164442		CDK14	7q21-q22	0.0129801
MBNL1	3q25	0.0119872		MAPKAPK3	3p21.3	0.0164697		FBLN1	22q13.31	0.0129813
ADAM17	2p25	0.0120345		SPIN3	Xp11.21	0.0164964		HDAC5	17q21	0.0130466
CLEC4D	12p13.31	0.0120711		CCNH	5q13.3-q14	0.0164975		YWHAH	22q12.3	0.0130908
SLC25A20	3p21.31	0.0120868		ARID4A	14q23.1	0.0165369		NFIL3	9q22	0.0131054
MLLT3	9p22	0.0121064		LINC01330	3q26.1	0.0165401		GPR183	13q32.3	0.0131216
STK17A	7p13	0.0121388		GRTP1	13q34	0.0165402		ZNF506	19p13.11	0.0131501
SNX25	4q35.1	0.0121414		RGS10	10q25	0.0165679		RYBP	3p13	0.0132611
LINC01134	1p36.32	0.0121877		CEP128	14q31.1	0.0165765		NEK2	1q32.3	0.0133396
LITAF	16p13.13	0.012211		LOC101927058	---	0.0166232		RUNX1T1	8q22	0.0133574
BACH1	21q22.11	0.0122693		TLR8-AS1	Xp22.31	0.0166393		ZC2HC1A	8q21.12	0.0133643
XPNPEP2	Xq25	0.012365		SHC1	1q21	0.0166516		AGO2	8q24	0.0133672
HPCAL1	2p25.1	0.0124659		DNAH1	3p21.1	0.0166616		SAR1B	5q31.1	0.0134358
FMNL1	17q21	0.012534		FMNL1	17q21	0.0166816		USP9X	Xp11.4	0.0134624
ALOX5AP	13q12	0.0125535		PPA2	4q25	0.0167423		PPP2R3C	14q13.2	0.0135664
MFAP3	5q32-q33.2	0.0125705		CLTB	5q35	0.0167913		ENPEP	4q25	0.0135677
2018-09-07	7p14.2	0.0125848		ZNF222	19q13.2	0.0168609		VTI1A	10q25.2	0.0135766
PPIL6	6q21	0.0126299		PSMB4	1q21	0.0168691		FOLR2	11q13.3-q13.5	0.0136134
ESR1	6q25.1	0.0126431		ARL1	12q23.2	0.0168728		NR3C1	5q31.3	0.013619
CCL13	17q11.2	0.0126537		FGFR2	10q26	0.0168796		DUSP19	2q32.1	0.0136736
KLHL18	3p21.31	0.0127169		HELQ	4q21.23	0.0168991		KIAA0196	8q24.13	0.0137115
LSMEM1	7q31.1	0.0127224		PTP4A3	8q24.3	0.0169231		KL	13q12	0.013722
CNBP	3q21	0.0127369		KLF9	9q13	0.0169616		FOSB	19q13.32	0.0137303
CACNA1D	3p14.3	0.012828		MLLT3	9p22	0.0170087		IFT122	3q21	0.0137644
VAMP3	1p36.23	0.0128387		IGSF3	1p13	0.0170127		RBM15	1p13	0.013807
KLHL29	2p24.1	0.0128702		LINC00907	18q12.3	0.0170204		BIN3	8p21.3	0.0138306
ANPEP	15q25-q26	0.0128862		EMP1	12p12.3	0.017069		TGFB1	19q13.1	0.0138565
RBMX	Xq26.3	0.0128952		IGF2R	6q26	0.0170904		KIF5B	10p11.22	0.0138708
BRD8	5q31	0.0128972		DDX3X	Xp11.3-p11.23	0.0170999		FH	1q42.1	0.0138802
SLC31A2	9q32	0.0129073		LOC100506274	2p25	0.0171241		PSEN2	1q42.13	0.0138861
CSF1	1p13.3	0.0129236		SPEN	1p36	0.0171814		ARHGAP26	5q31	0.0139482
POLD4	11q13	0.0129354		KIF22	16p11.2	0.0171883		MYO1D	17q11.2	0.0139645
DBN1	5q35.3	0.012948		MICALL2	7p22.3	0.0171994		HECTD4	12q24.13	0.0140572
ANTXR2	4q21.21	0.0130268		LOC101929210	4q22	0.0172044		IL6ST	5q11.2	0.0140589
DLG2	11q14.1	0.0130288		ATP6V0C	16p13.3	0.0172568		MYCBP2	13q22	0.0140708
SEC23A	14q21.1	0.0131323		LOC105370178	---	0.0172584		COCH	14q11.2-q13	0.014073
LINC00671	17q21.31	0.0131708		WASL	7q31.3	0.0172908		COX6C	8q22.2	0.0141041
MFNG	22q12	0.0131821		GIPC3	19p13.3	0.0173053		PCM1	8p22-p21.3	0.014159
PTPRO	12p13.3-p13.2|12p13-p12	0.0131872		VCPIP1	8q13	0.0173087		GNG10	9q31.3	0.014165
CCDC148	2q24.1	0.0131986		LHX4	1q25.2	0.0174096		CARD8-AS1	---	0.0141934
TPR	1q25	0.0132124		LOC105379704	---	0.0174851		PECAM1	17q23.3	0.0142121
JPX	Xq13.2	0.013217		PAPOLG	2p16.1	0.0175283		EGR3	8p23-p21	0.0142184
TOR1AIP2	1q25.2	0.0132193		HOPX	4q12	0.0176014		MED26	19p13.11	0.01434
PCBP3	21q22.3	0.0132871		MYRF	11q12-q13.1	0.017602		HLA-E	6p21.3	0.0143536
LOC100505727	---	0.0132889		FCGR2A	1q23	0.0177081		ASXL2	2p24.1	0.0143597
EXOC3L1	16q22.1	0.013295		MVP	16p11.2	0.0177437		PLIN3	19p13.3	0.0143774
ASPA	17p13.3	0.0133004		RALY	20q11.21-q11.23	0.0177673		C12orf66	12q14.2	0.0143791
NDST1	5q33.1	0.0133092		ZNF91	19p12	0.0177863		CEACAM1	19q13.2	0.0143813
PDE4D	5q12	0.0133459		PRKAB2	1q21.1	0.0178072		RBM25	14q24.3	0.014426
TSC22D3	Xq22.3	0.013352		LOC101927066	8q22.1	0.0178152		AP1S2	Xp22.2	0.0144864
HSP90AB1	6p12	0.0134429		TRAPPC3	1p34.3	0.0178376		MRPL57	13q12.11	0.0144915
CEP70	3q22.3	0.0134605		SQSTM1	5q35	0.0178514		FHL1	Xq26	0.0145039
HRH1	3p25	0.0135106		TUFM	16p11.2	0.0178834		CELSR1	22q13.3	0.0145098
MAF	16q22-q23	0.0135277		KDM5B	1q32.1	0.0179142		MS4A4A	11q12	0.0145237
CNOT4	7q33	0.0135385		CD6	11q13	0.0179309		C1orf210	1p34.2	0.0146431
LINC00092	9q22.32	0.0135536		PPP5D1	---	0.017956		AFF3	2q11.2-q12	0.0146542
HIST1H4C	6p22.1	0.0135862		TRAFD1	12q	0.0179669		LOC729732	8p23.1	0.0146772
PLAU	10q22.2	0.0136427		BCR	22q11.23	0.0179979		EEF1A1	6q14.1	0.0147017
RTN4	2p16.3	0.0136489		INPP1	2q32	0.0180436		FN1	2q34	0.0147604
GUCY2C	12p12	0.0136526		GPLD1	6p22.1	0.0180749		SNX13	7p21.1	0.0148079
GRAP	17p11.2	0.0136731		CNTN1	12q11-q12	0.0181179		TTF2	1p22	0.0148123
SUMO3	21q22.3	0.0136866		DRG1	22q12.2	0.0181224		CNTNAP4	16q23.1	0.0148478
DYRK2	12q15	0.0137044		TM2D3	15q26.3	0.0181768		PPP1R3B	8p23.1	0.0148826
BCL6B	17p13.1	0.0137144		TBX2	17q23.2	0.0182113		ZNF208	19p12	0.0149871
PDGFRB	5q33.1	0.0137708		ATAD3A	1p36.33	0.0182123		SNX22	15q22.31	0.0150297
RHOJ	14q23.2	0.0138057		PSEN2	1q42.13	0.0182298		MAP3K6	1p36.11	0.0150413
HIP1	7q11.23	0.0138314		PCBP3	21q22.3	0.0182386		PRAME	22q11.22	0.0150686
SEC14L1	17q25.2	0.0138345		ZNF518A	10q24.1	0.0182737		SLC16A7	12q13	0.0150813
CALM2	19q13.2-q13.3	0.0138797		ZBTB38	3q23	0.0182849		ITGB1	10p11.2	0.0151055
NCOA3	20q12	0.0138984		ZNF254	19p12	0.01831		IRAK3	12q14.3	0.0152021
SLC34A3	9q34	0.0139262		CCDC125	5q13.2	0.0184156		SKAP2	7p15.2	0.0152037
STOM	9q34.1	0.0139715		ZNF655	7q22.1	0.0184551		FBXL14	12p13.33	0.0152109
AAK1	2p14	0.0139938		TNFSF9	19p13.3	0.0184639		FBXL13	7q22.1	0.0152253
MKNK1	1p33	0.0139956		PAX5	9p13	0.018504		ZNF136	19p13.2	0.0152412
GTF2E1	3q21-q24	0.014008		VDR	12q13.11	0.0185161		MTMR9	8p23-p22	0.0152763
PIK3CG	7q22.3	0.014014		MAP2K1	15q22.1-q22.33	0.0185585		MCTP1	5q15	0.0153208
OGDH	7p14-p13	0.014069		EIF4G2	11p15	0.0185666		ADAMTS5	21q21.3	0.0153236
NOVA2	19q13.3	0.0140951		LMO1	11p15	0.0185884		CTSO	4q32.1	0.0153615
MERTK	2q14.1	0.0140974		LTBR	12p13	0.0186441		MDFIC	7q31.1-q31.2	0.0153653
DLGAP1	18p11.31	0.0141054		SDS	12q24.13	0.01865		MTHFD1	14q24	0.0153709
NAIP	5q13.2	0.0141188		PELO	5q11.2	0.0187011		SNTB2	16q22.1	0.0154661
ATF3	1q32.3	0.0141563		IKBKAP	9q31	0.0188314		PRKACA	19p13.1	0.0154817
LAYN	11q23.1	0.0142256		SUMO3	21q22.3	0.0188403		TPBG	6q14-q15	0.015523
STXBP2	19p13.3-p13.2	0.0142485		CANX	5q35	0.0188473		SLC16A1-AS1	1p13.2	0.0156204
WDR64	1q43	0.0142533		RARRES1	3q25.32	0.0188683		IPP	1p34-p32	0.0156222
CCL20	2q36.3	0.0142623		TAS1R1	1p36.23	0.0189126		SLC35G2	3q22.3	0.0156403
MEF2D	1q12-q23	0.0142842		Dbpht2	12|12 C3	0.0189695		PSMD4	1q21.3	0.0157662
KIF13B	8p12	0.0143063		KCNK15	20q13.12	0.0189943		AKNA	9q32	0.0157723
SORD	15q15.3	0.0143199		TIAL1	10q	0.0190339		FOXF2	6p25.3	0.0157845
ADAT3	19p13.3	0.0143519		CTBP2	10q26.13	0.0190477		LIPC	15q21-q23	0.0157858
MTG2	20q13.33	0.014405		C12orf66	12q14.2	0.0190794		PAX7	1p36.13	0.0158176
LINC01281	Xp11.4	0.0144105		MYLK3	16q11.2	0.01908		MATN1	1p35	0.0158275
IL17RA	22q11.1	0.014432		MATN1	1p35	0.0190972		ZBTB1	14q23.3	0.0159374
LOC105373434	---	0.0144419		LAPTM4A	2p24.1	0.0191023		PDE1A	2q32.1	0.0160284
INPP5D	2q37.1	0.0144515		ARHGAP5	14q12	0.0192071		CACNA1A	19p13	0.0160422
RBM25	14q24.3	0.014483		SV2A	1q21.2	0.0192641		PRR5-ARHGAP8	22q13.31	0.0160508
NF2	22q12.2	0.0145056		TCIRG1	11q13.2	0.0193071		ARFRP1	20q13.3	0.0160517
PCBP2	12q13.13	0.0145112		IBA57	1q42.13	0.01932		COBL	7p12.1	0.0162109
ZFR	5p13.3	0.0145525		SEC62	3q26.2	0.0193334		UBE2B	5q31.1	0.0162773
CD44	11p13	0.0145604		RFWD2	1q25.1-q25.2	0.0193393		SRSF7	2p22.1	0.0162779
VSTM4	10q11.23	0.0145767		LINC00032	9p21	0.0193638		SLC16A2	Xq13.2	0.0164202
NFKBIA	14q13	0.0146049		WTAP	6q25-q27	0.0193924		EXOSC6	16q22.1	0.0164277
HHEX	10q23.33	0.0146524		RAD23A	19p13.2	0.0194323		PKHD1	6p12.2	0.0164384
VTN	17q11	0.0146789		CD44	11p13	0.0195076		DHX9	1q25	0.0164538
PRKCH	14q23.1	0.0146923		DLG1	3q29	0.0196248		KDM5B	1q32.1	0.0164879
POLR3B	12q23.3	0.0147396		SLC5A6	2p23	0.0196922		ZDHHC2	8p22	0.0165143
IL1R1	2q12	0.0148568		RNF216	7p22.1	0.0197018		CYP3A5	7q21.1	0.0165199
RAD51AP1	12p13.2-p13.1	0.0148582		PACRG-AS2	---	0.0197082		MMRN1	4q22	0.0165987
MASP1	3q27-q28	0.0148769		PRKCE	2p21	0.0197981		RPUSD3	3p25.3	0.0166576
WASIR2	16p13.3	0.0149044		ABCB9	12q24	0.0198337		GUCY1B3	4q31.3-q33	0.0167011
GADD45A	1p31.2	0.0149712		GRK6	5q35	0.0198385		NAA35	9q21.33	0.0167227
KLHL3	5q31	0.0149875		NBEAL1	20q13.2	0.0198563		CNOT4	7q33	0.0168142
OFD1	Xp22	0.0149977		ZNF333	19p13	0.0198944		TMEM163	2q21.3	0.0168548
CTSC	11q14.2	0.0150135		RTN2	19q13.32	0.0199014		EPS8	12p12.3	0.0168616
CDKN2AIPNL	5q31.1	0.0150175		TMEM53	1p34.1	0.0199516		EAF2	3q13.33	0.0168882
LOC105378011	---	0.015023		E2F1	20q11.2	0.0199915		PPID	4q31.3	0.0169329
RFX1	19p13.1	0.0150448		SKIL	3q26	0.0200351		MIEF1	22q13	0.0169672
LOC105376796	---	0.0150479		2018-09-09	17q25	0.0201496		ABCB9	12q24	0.0169758
RAB7A	3q21.3	0.0150875		LOC100506585	---	0.0201972		ZFP36	19q13.1	0.0169872
ATP6V1A	3q13.31	0.0151124		CAPNS1	19q13.12	0.0202251		SREK1IP1	5q12.3	0.0170243
EIF3M	11p13	0.0151853		HK1	10q22	0.0202253		LIMS1	2q12.3	0.0170439
LINC00354	13q34	0.0152809		RAB35	12q24.31	0.0202324		CXCL12	10q11.1	0.0170454
PPP2R1B	11q23.2	0.0153001		GATB	4q31.3	0.0202691		STON2	14q31.1	0.0170788
ALDOB	9q21.3-q22.2	0.0154326		DIO2	14q24.2-q24.3	0.0203024		RPL8	8q24.3	0.0171117
SPN	16p11.2	0.0154926		ATP2B2	3p25.3	0.0203109		MALAT1	11q13.1	0.0171224
SPIN3	Xp11.21	0.0155025		TNK2-AS1	3q29	0.0203144		CCDC141	2q31.2	0.0171249
ACTR3	2q14.1	0.0155032		KCNH5	14q23.2	0.0203621		GGPS1	1q43	0.0171264
FLT3LG	19q13.3	0.0155375		CLN6	15q23	0.0203766		MLH1	3p21.3	0.0171555
MORF4L2	Xq22	0.0155546		ZSCAN20	1p34.3	0.0203878		FRYL	4p11	0.0171793
SLC35G2	3q22.3	0.0155613		ZNF626	19p12	0.0204365		FAM201A	9p13.1	0.0171957
MAP3K14	17q21	0.0155717		B3GNT6	11q13.4	0.0204636		SLC39A14	8p21.3	0.0172241
GSTO1	10q25.1	0.0155949		RAPGEF6	5q31.1	0.0205465		CD28	2q33	0.0172421
CALU	7q32.1	0.0156965		ZNF732	4p16.3	0.020555		MSX1	4p16.2	0.017246
QKI	6q26	0.0157125		SRGAP2	1q32.1	0.0206136		TAB3	Xp21.2	0.0172746
LYST	1q42.1-q42.2	0.015724		LINC00632	Xq27.1	0.0206676		CACNA2D1	7q21-q22	0.0173295
KLHDC7B	22q13.33	0.0157299		SRM	1p36-p22	0.0206899		SRGAP3	3p25.3	0.0173634
C20orf166-AS1	20q13.33	0.0157425		TMEM151B	6p21.1	0.0206937		ACADVL	17p13.1	0.0173809
LOC101929261	---	0.0157771		TWIST2	2q37.3	0.0206943		PRSS23	11q14.1	0.0174206
ARHGAP25	2p13.3	0.0157922		ATP4B	13q34	0.0207265		RAB7A	3q21.3	0.0175011
MMP2	16q12.2	0.0158015		ZACN	17q25.3	0.0207382		PAXIP1-AS2	7q36.2	0.0175032
RTN2	19q13.32	0.0158218		CCNT2	2q21.3	0.0207385		GHR	5p13-p12	0.0175137
LDLR	19p13.2	0.015824		TGOLN2	2p11.2	0.0207705		CAV1	7q31.1	0.0176099
DUSP18	22q12.2	0.0158601		ARHGEF7	13q34	0.0207738		SPARCL1	4q22.1	0.0176743
SEMA3B	3p21.3	0.0159063		CHD1	5q15-q21	0.0207842		OPCML	11q25	0.0176904
RBM8A	1q21.1	0.0159127		LOC100287221	16q24.2	0.0207973		CCDC88A	2p16.1	0.0176917
LCP2	5q35.1	0.0160634		BCL2L1	20q11.21	0.0208244		NF2	22q12.2	0.0177023
C16orf45	16p13.11	0.0161371		SLC30A5	5q12.1	0.0208248		MFAP3L	4q32.3	0.0177028
C6orf106	6p21.31	0.0161397		CYP4A11	1p33	0.0208595		TRAK2	2q33	0.0177201
ELF4	Xq26	0.0161732		KAT7	17q21.32	0.0208865		TFDP1	13q34	0.0177276
ARHGAP1	11p11.2	0.0163118		KIAA1656	22q12.2	0.0209402		CSF1R	5q32	0.0177816
CDC20B	5q11.2	0.0163269		CFAP74	1p36.33	0.0210732		SAMSN1	21q11	0.0178524
HS2ST1	1p22.3	0.0163442		MAPRE1	20q11.1-q11.23	0.0210931		CLU	8p21-p12	0.0178855
PTGS1	9q32-q33.3	0.0163875		GABRB3	15q12	0.0211416		STAB1	3p21.1	0.0179036
SSBP1	7q34	0.0163971		TRIM4	7q22-q31.1	0.0212338		ARHGEF12	11q23.3	0.0179415
LOC101927237	---	0.0164345		HLA-DQA1	6p21.3	0.021263		CFAP53	18q21.1	0.0179495
IFT122	3q21	0.0164362		UBE2D3	4q24	0.0213287		LINC00623	1q21.1	0.0180385
SRSF11	1p31	0.0164502		SRSF1	17q22	0.0213288		LOC105369477	---	0.0180546
ZAK	2q24.2	0.0164607		RPL37A	2q35	0.0213755		ENTPD4	8p21.3	0.0180982
2018-09-08	5q31	0.0164636		LLGL2	17q25.1	0.0214099		PARM1	4q13.3-q21.3	0.0181249
LRP10	14q11.2	0.0164716		GIN1	5q21.1	0.0214688		ZNF264	19q13.4	0.0181475
HCAR3	12q24.31	0.0164854		ARF3	12q13	0.0215865		AVPR1A	12q14.2	0.0181549
RNASE2	14q11.2	0.0164865		CSTB	21q22.3	0.0217501		SRSF9	12q24.31	0.0181699
PAX7	1p36.13	0.0165012		DOCK4	7q31.1	0.0217982		ITGA5	12q11-q13	0.0182568
CRISPLD2	16q24.1	0.0165182		SMC3	10q25	0.0218582		PAFAH1B1	17p13.3	0.0182774
ITGAM	16p11.2	0.0165521		ESYT3	3q22.3	0.0218844		CLN5	13q21.1-q32	0.0182853
TCF4	18q21.1	0.0165652		ATG9A	2q35	0.0219011		SLFN5	17q12	0.0183069
EMP3	19q13.3	0.0165694		LINC01566	16p11.1	0.0219709		ROR1	1p31.3	0.0183176
KLF6	10p15	0.0166515		ZNF169	9q22.32	0.0220258		ARHGEF4	2q22	0.018323
EEF1D	8q24.3	0.0166709		SLC38A10	17q25.3	0.0220999		RGL3	19p13.2	0.0183725
IMMP2L	7q31	0.0166822		BRD4	19p13.1	0.0221257		HBB	11p15.5	0.0183897
SMC3	10q25	0.0166965		ATP6	---	0.0221818		NFE4	7q22.1	0.0184205
ARHGDIA	17q25.3	0.0167		RNF44	5q35.2	0.0221928		TECR	19p13.12	0.0184589
SLC1A3	5p13	0.0167042		MET	7q31	0.0222771		PCOLCE	7q22	0.0184813
SIVA1	14q32.33	0.0167359		KCNT1	9q34.3	0.0223918		ICMT	1p36.21	0.0185269
SLC7A7	14q11.2	0.0167381		KPNA1	3q21	0.0224065		CLASP2	3p22.3	0.0185402
COL9A3	20q13.3	0.0167393		RHBDD3	22q12.2	0.0224091		LIPT1	2q11.2	0.018579
TYRP1	9p23	0.0168222		RAPGEF5	7p15.3	0.0224259		EGR2	10q21.1	0.0185913
YPEL2	17q22	0.0168995		ZNF426	19p13.2	0.0224572		RABIF	1q32.1	0.0185972
POLA1	Xp22.1-p21.3	0.0169379		STX19	3q11	0.0225247		FBXW12	3p21.31	0.0186201
CHSY1	15q26.3	0.0169599		RHBDL3	17q11.2	0.0225414		ATXN1	6p23	0.0186754
TMEM163	2q21.3	0.0169978		NKTR	3p22.1	0.0225428		ERH	14q24.1	0.0187097
PPP1R27	17q25.3	0.0170178		EIF3F	11p15.4	0.0226136		CDC42SE2	5q31.1	0.0187553
PAWR	12q21	0.0170392		CDCP1	3p21.31	0.0226266		MIA3	1q41	0.0187686
MAP1A	15q15.3	0.0171143		MCOLN2	1p22	0.0226566		NEXN	1p31.1	0.0187952
TMEM53	1p34.1	0.0171459		CUL4B	Xq23	0.0226658		DTWD1	15q21.2	0.0188176
PPP2CB	8p12	0.0171513		TCTN2	12q24.31	0.0226924		ZNF318	6p21.1	0.0188421
IQSEC1	3p25.2	0.0171575		PPIL6	6q21	0.0227362		MROH1	8q24.3	0.018869
TOP2A	17q21.2	0.0172172		CHCHD5	2q13	0.0227581		KCTD7	7q11.21	0.0188909
ADRB2	5q31-q32	0.0172681		LOC150596	2q23.3	0.0228344		SPATA17	1q41	0.0189
PRRX1	1q24	0.0173091		LYST	1q42.1-q42.2	0.0229048		NBPF9	1q21.2	0.0189293
ITGB5	3q21.2	0.0173687		GNA11	19p13.3	0.0229717		FGD2	6p21.2	0.0189391
BCL2L1	20q11.21	0.0173873		RNF141	11p15.4	0.0230062		GNA13	17q24.3	0.0189608
ETHE1	19q13.31	0.0173884		INPP4A	2q11.2	0.0230148		POLA1	Xp22.1-p21.3	0.0189776
SCAMP1	5q14.1	0.0174358		HNRNPL	19q13.2	0.0230567		BTG1	12q22	0.0190054
ADAMTS18	16q23	0.0174438		CLASP2	3p22.3	0.0230707		MYSM1	1p32.1	0.0191159
EPB41L3	18p11.32	0.0174496		MAPKAPK2	1q32	0.0230776		DAB2	5p13.1	0.0191272
CSK	15q24.1	0.0175123		MLH1	3p21.3	0.0231879		IVD	15q14-q15	0.0191484
TIE1	1p34-p33	0.0175253		LOC283788	---	0.0232561		CXCL2	4q21	0.0192013
PEX1	7q21.2	0.0175854		ABI1	10p11.2	0.0232627		PIKFYVE	2q34	0.0192146
TLE4	9q21.31	0.0176009		ECH1	19q13.1	0.0232634		BAG1	9p12	0.0192228
ITGB1BP1	2p25.2	0.017613		DDX18	2q14.1	0.0232926		OR4D1	17q23.2	0.0192898
FAM216A	12q24.11	0.0176199		UBE2D2	5q31.2	0.0233501		METTL20	12p11.21	0.0193137
CASP10	2q33-q34	0.0176403		KDM4A	1p34.1	0.0233673		PROCR	20q11.2	0.0193183
PDE10A	6q26	0.0176423		PCDH1	5q31.3	0.0234138		TSPAN31	12q13.3	0.0193306
ANAPC5	12q24.31	0.0176607		C2CD3	11q13.4	0.0234267		TMCC2	1q32.1	0.0193736
VAPB	20q13.33	0.0176618		PIGK	1p31.1	0.0234278		TCTE3	6q27	0.0194033
PTPN18	2q21.1	0.0176756		PAEP	9q34	0.0234428		ZFP37	9q32	0.0194304
GLIPR1	12q21.2	0.0177608		RAB14	9q33.2	0.023468		PLEKHB2	2q21.1	0.0194674
HP1BP3	1p36.12	0.0177709		C4orf36	4q21.3	0.0235		RCBTB2	13q14.3	0.0194842
LOC101928694	---	0.0177912		GPR180	13q32.1	0.0235223		FNIP2	4q32.1	0.0195045
TNPO1	5q13.2	0.0178051		PTPN2	18p11.3-p11.2	0.0235529		REL	2p13-p12	0.019614
STS	Xp22.32	0.0178412		RPS3A	10q23.1	0.0236207		PDE3A	12p12	0.0196177
HAVCR2	5q33.3	0.0179361		ALCAM	3q13.1	0.0236425		PTPRG	3p21-p14	0.0196889
MSRB3	12q14.3	0.0180274		XRCC4	5q14.2	0.023812		FAM20B	1q25	0.0197108
RNF170	8p11.21	0.0181268		C15orf62	15q15.1	0.0240144		TGFBR1	9q22	0.0197675
AKAP10	17p11.1	0.0181415		LOC100240728	---	0.0240418		INTS6	13q14.3	0.0199152
OCA2	15q	0.0181718		LOC146795	17q24.3	0.0240498		STK4	20q11.2-q13.2	0.019921
HSPG2	1p36.1-p34	0.0181915		CRMP1	4p16.1	0.0241246		VSIG4	Xq12-q13.3	0.0199639
TIAL1	10q	0.0182034		CTDSP2	12q14.1	0.024159		GCLC	6p12	0.019982
ZCCHC7	9p13.2	0.018211		CCDC85B	11q12.1	0.0241705		SEC23IP	10q25-q26	0.0200001
MEI1	22q13.2	0.0182656		STX7	6q23.1	0.0242906		SLC25A27	6p12.3	0.0200233
THBD	20p11.2	0.0182881		SIRPB2	20p13	0.0242907		BEND5	1p33	0.0200884
ADGRG5	16q21	0.0183209		ADIG	20q11.23	0.0243133		ND2	---	0.0200923
RFFL	17q12	0.018322		ZC2HC1A	8q21.12	0.0243359		PRMT2	21q22.3	0.0200993
ITGAX	16p11.2	0.0183243		DDAH2	6p21.3	0.0243658		NAP1L3	Xq21.3-q22	0.0201601
NOL4L	20q11.21	0.0183682		KCND1	Xp11.23	0.0243813		FLJ35934	17p11.2	0.0202312
HIVEP1	6p24-p22.3	0.0184133		TPCN1	12q24.13	0.0243956		PDE4C	19p13.11	0.0202356
SAMSN1	21q11	0.0184641		CRACR2A	12p13.32	0.0244495		ECM2	9q22.3	0.0203019
SPEN	1p36	0.0184717		MTMR3	22q12.2	0.0245067		TMX2-CTNND1	11q11	0.0204182
SPECC1L-ADORA2A	22q11.23	0.0184877		MAPK11	22q13.33	0.02453		FILIP1	6q14.1	0.0204571
LINS1	15q26.3	0.0185236		RASEF	9q21.32	0.0245406		SRPX2	Xq22.1	0.0205104
DIO3OS	14q32.31	0.0185342		PGAM5	12q24.33	0.0245464		TFAP2A	6p24	0.0205609
SPPL3	12q24.31	0.0185541		FOSL1	11q13	0.0246154		SLC1A2	11p13-p12	0.020567
STAT2	12q13.3	0.0185693		VPS9D1	16q24	0.0246881		SLC38A10	17q25.3	0.0206639
SPP1	4q22.1	0.018611		TERF1	8q21.11	0.0247176		RRAD	16q22	0.0207554
IER5	1q25.3	0.0186111		HGSNAT	8p11.1	0.0247547		FOSL2	2p23.3	0.0207757
GNAS	20q13.3	0.0186417		DCC	18q21.3	0.0247549		RTN1	14q23.1	0.0209129
LOC100128288	17p13.1	0.0186677		ZNF560	19p13.2	0.0247995		PRKD1	14q11	0.0209152
RGS14	5q35.3	0.0186697		CACUL1	10q26.11	0.0248044		FLT1	13q12	0.0209561
GPR180	13q32.1	0.0187031		ZNF430	19p12	0.0248322		FCER1A	1q23	0.0210134
GRIK1	21q22.11	0.0187357		HOMER2	15q24.3	0.0248342		LRRC41	1p34.1	0.021093
WISP2	20q13.12	0.0187605		DBF4B	17q21.31|17q21	0.0248431		WIPF1	2q31.1	0.0211261
RPUSD3	3p25.3	0.0188107		AK7	14q32.2	0.0248566		GNAS	20q13.3	0.021143
MTHFD1L	6q25.1	0.0189015		LOC728613	5p15.33	0.0248941		AIFM1	Xq26.1	0.0211761
ITGB1	10p11.2	0.0189025		ZBTB1	14q23.3	0.0249738		USP13	3q26.2-q26.3	0.0211826
PDE8A	15q25.3	0.018931		PNKD	2q35	0.0249777		CELSR2	1p21	0.0211861
MPV17	2p23.3	0.0190743		LOC105377276	---	0.0249905		LINC01231	9p24.2	0.0212483
KY	3q22.2	0.019143		ZNF638	2p13.1	0.025001		ZC3H12C	11q22.3	0.0212907
TGM2	20q12	0.019178		HAGH	16p13.3	0.0250204		PPP3R1	2p15	0.0213142
PLEKHB2	2q21.1	0.0191976		PXN	12q24.31	0.0251073		MAPKAPK3	3p21.3	0.0213165
CD74	5q32	0.0192601		PRR5-ARHGAP8	22q13.31	0.0251336		EGF	4q25	0.0213267
GTF2H5	6q25.3	0.0192986		MAPK4	18q21.1	0.025173		CCND2	12p13	0.0213453
KLHL8	4q22.1	0.0193202		C1orf210	1p34.2	0.0251961		PAPOLG	2p16.1	0.021392
LOC101928205	17q24.3	0.0193334		FGD2	6p21.2	0.0252382		ARHGEF7	13q34	0.0213939
PTGIR	19q13.3	0.0193383		MUC6	11p15.5	0.0252662		LTBR	12p13	0.0213961
PIK3AP1	10q24.1	0.0193703		TGM4	3p22-p21.33	0.0252693		ROCK1	18q11.1	0.0214135
PDHA1	Xp22.1	0.0193843		FAM120A	9q22.31	0.0252718		PDE1C	7p14.3	0.0214202
PLB1	2p23.2	0.0193991		CAPZA2	7q31.2-q31.3	0.0253165		SLC2A13	12q12	0.0214713
AGAP2	12q14.1	0.0194261		SLC22A23	6p25.2	0.0253393		ZNF555	19p13.3	0.0214912
MYH11	16p13.11	0.0194358		TCP11L1	11p13	0.0253425		NUP133	1q42.13	0.0215051
NR1I3	1q23.3	0.0195034		CLDN19	1p34.2	0.0253517		COX7B	Xq21.1	0.0215375
ABCA1	9q31.1	0.0195103		ART5	11p15.4	0.0253939		FEZ1	11q24.2	0.0215887
HNMT	2q22.1	0.0195596		SPECC1L-ADORA2A	22q11.23	0.0256127		CRACR2A	12p13.32	0.021619
CARHSP1	16p13.2	0.0195623		BTG4	11q23	0.0256418		RPS6KA3	Xp22.2-p22.1	0.0217264
PIK3IP1	22q12.2	0.0195733		ZBTB20	3q13.2	0.0256657		PGM2L1	11q13.4	0.0217316
SLC46A1	17q11.2	0.0195952		CSH2	17q24.2	0.0256767		CCDC140	2q36.1	0.0217658
CSE1L	20q13	0.0196131		FPGS	9q34.1	0.0256786		PURA	5q31	0.0218505
WDHD1	14q22.2	0.0196145		PLXND1	3q22.1	0.0257079		EPB41L4A	5q21.3	0.021908
ALG5	13q13.3	0.0196445		ZNF136	19p13.2	0.025795		PRDX2	19p13.2	0.0219125
IFNLR1	1p36.11	0.0196505		ABCC5	3q27	0.02587		NAALAD2	11q14.3-q21	0.0221223
ZNF641	12q13.11	0.0196664		RPS10	11p11.2	0.0259096		RHOH	4p13	0.0221689
KCNQ1-AS1	11p15.5	0.019732		FLJ37786	1q21	0.0259521		TAF15	17q11.1-q11.2	0.0221971
KRT19	17q21.2	0.0197488		SNX19	11q25	0.0259732		CD40	20q12-q13.2	0.0222301
LETM2	8p11.23	0.0197654		ADAT3	19p13.3	0.0259771		CDK2AP1	12q24.31	0.0222334
CD93	20p11.21	0.0199368		AGA	4q34.3	0.0259942		GRK4	4p16.3	0.0222482
GRIN2A	16p13.2	0.019982		DGCR5	22q11	0.026006		RGS12	4p16.3	0.0222682
LOC101928632	---	0.0200193		GLMP	1q22	0.0260105		SGCB	4q12	0.0222697
PPP2R5B	11q12	0.0200308		ARID3A	19p13.3	0.0260741		ZBTB3	11q12.3	0.0222728
HEATR1	1q43	0.0200632		BCAS4	20q13.13	0.026125		ATP7A	Xq21.1	0.0223228
PIP4K2B	17q12	0.0201175		SATB2-AS1	2q33.1	0.026139		CFHR2	1q31.3	0.0223709
HMGCLL1	6p12.1	0.0201253		MIEF1	22q13	0.0262057		TRAPPC12	2p25.3	0.0226633
SLA	8q24	0.020126		XIAP	Xq25	0.0262287		LTBP2	14q24	0.0226967
PTK2B	8p21.1	0.0201536		CRABP2	1q21.3	0.026296		LINC00857	10q22.3	0.0226994
JAK2	9p24	0.0202071		UTP14C	13q14.2	0.0263087		TAT	16q22.1	0.0227049
HMGCS1	5p14-p13	0.0202237		THADA	2p21	0.0263778		EPM2AIP1	3p22.1	0.0227284
FCER1G	1q23	0.0203021		SRC	20q12-q13	0.026458		KLHL20	1q25.1	0.0227656
TRADD	16q22	0.0203033		CHP2	16p12.2	0.0265003		TBCE	1q42.3	0.0228051
LOC727916	6q12	0.0203118		ARHGEF12	11q23.3	0.0265342		ENO3	17p13.2	0.0228381
SRGAP2	1p11.2	0.0203916		ROCK2	2p24	0.0265743		ZNF333	19p13	0.0228738
LOC284926	22q13.31	0.0204051		KAT6B	10q22.2	0.0265877		EGR1	5q31.1	0.0228871
MCL1	1q21	0.020438		LOC101926975	5q31.3	0.0266149		CD36	7q11.2	0.0229422
BPNT1	1q41	0.0204568		KIF5A	12q13.13	0.0266317		MESDC1	15q13	0.0230172
UBL4B	1p13.3	0.0204823		HOXB2	17q21.32	0.0266517		CD14	5q31.1	0.0230205
SERPINB5	18q21.33	0.0204945		ZNF93	19p12	0.0266521		FOXK2	17q25	0.0230406
SV2B	15q26.1	0.0205412		MKRN1	7q34	0.0266525		PALLD	4q32.3	0.0231528
ODF3	11p15.5	0.0205502		LETM2	8p11.23	0.0267139		PHC2	1p34.3	0.0231759
NCOR1	17p11.2	0.0205724		AKT1S1	19q13.33	0.0268074		PSMB4	1q21	0.0231793
THUMPD3-AS1	3p25.3	0.0206786		LOC101929007	---	0.0268491		HSD11B1L	19p13.3	0.023193
HERPUD2	7p14.2	0.0206856		KCNQ1OT1	11p15	0.0268711		ARL17A	17q21.31	0.0232197
CEP78	9q21.2	0.0207277		C15orf39	15q24.2	0.0269441		ATP6V1G2-DDX39B	6p	0.0232964
CSTB	21q22.3	0.0207359		TMPRSS2	21q22.3	0.0269868		SOX6	11p15.3	0.0233089
C22orf34	22q13.33	0.0207967		LOC101928167	18q21.2	0.0269961		PCSK5	9q21.3	0.0233164
SYTL4	Xq21.33	0.0208008		MYSM1	1p32.1	0.0270238		CXorf36	Xp11.3	0.0233331
SLC2A5	1p36.2	0.020876		SYCE1	10q26.3	0.0270275		FAM185A	7q22.1	0.0233694
PPIC	5q23.2	0.0209252		SIK3	11q23.3	0.0270778		SLC30A9	4p13	0.0234018
ZNF605	12q24.33	0.02116		TRPV6	7q34	0.0270911		FAM65B	6p22.3-p21.32	0.0234327
CIB1	15q25.3-q26	0.0211696		BAHCC1	17q25.3	0.0271033		STK19	6p21.3	0.0234382
ZNF33B	10q11.2	0.0211848		PRR5L	11p13-p12	0.0271292		ZNF75D	Xq26.3	0.0234467
CRHBP	5q13.3	0.0211887		CMTM1	16q21	0.0272263		DNAH14	1q42.12	0.0234677
AFP	4q13.3	0.0212361		UQCRC1	3p21.3	0.0272812		CDS1	4q21.23	0.023516
FCGR2A	1q23	0.0212398		TOM1	22q13.1	0.0272895		PDE6D	2q35-q36	0.0235503
VAV2	9q34.1	0.0212982		SPATA21	1p36.13	0.027375		FDPS	1q22	0.0235576
PLEKHO2	15q22.1	0.021331		ZNF70	22q11.23	0.0273925		ARHGAP25	2p13.3	0.0235675
ACTA2-AS1	10q23.31	0.0213518		MEIS3	19q13.32	0.0274662		CKMT1A	15q15	0.0236227
FAM65B	6p22.3-p21.32	0.0213597		RPS23	5q14.2	0.0274827		GEM	8q13-q21	0.0236712
SLC8A1	2p22.1	0.0213726		DUOX1	15q15.3	0.027529		LINC00173	12q24.22	0.0237128
CNTFR	9p13	0.0214742		ANKLE1	19p13.11	0.0276046		TRMT2B	Xq22.1	0.0237144
ODF4	17p13.1	0.0215859		UPP1	7p12.3	0.0276134		EEF1D	8q24.3	0.0237323
LPP	3q28	0.0216593		ADGRG3	16q21	0.0276188		HNRNPU	1q44	0.0237438
MEDAG	13q12.3	0.0216709		UBE4A	11q23.3	0.0276483		FXYD1	19q13.1	0.0237491
LRRC28	15q26.3	0.0216864		ZNF599	19q13.11	0.0276561		LINC00593	15q23	0.0237957
HAS3	16q22.1	0.0216999		MAP7	6q23.3	0.0276617		SOX13	1q32	0.0237992
FCRL2	1q21	0.0217131		PCDH11X	Xq21.3	0.0276818		IMPA2	18p11.2	0.0238561
CD37	19q13.3	0.0217855		ELF3	1q32.2	0.0276994		KLHL4	Xq21.3	0.0239151
SCRN3	2q31.1	0.0218205		SDHD	11q23	0.0277272		HSP90AB1	6p12	0.0239855
NOTCH3	19p13.2-p13.1	0.0219188		MTHFD1L	6q25.1	0.0277329		RPP14	3p14.3	0.0240167
LOC401261	6p21.1	0.0219558		PCDH17	13q21.1	0.0277411		C10orf90	10q26.2	0.0240627
FRRS1	1p21.2	0.0219995		PDE8A	15q25.3	0.027745		SOX5	12p12.1	0.0240712
SH3BP5	3p24.3	0.0220059		ARHGDIG	16p13.3	0.0277492		FER	5q21	0.0240887
ANKRD26	10p12.1	0.022006		TAF7	5q31	0.0277748		LOC401261	6p21.1	0.0241107
CNPPD1	2q35	0.0220149		SOHLH1	9q34.3	0.0278351		TMEM106C	12q13.1	0.0241146
CDC42SE2	5q31.1	0.0220931		PCF11	11q13	0.0278736		BASP1	5p15.1	0.0241589
SLC39A14	8p21.3	0.022139		RFX1	19p13.1	0.0278743		LINC00572	13q12.3	0.0241701
MMP15	16q13	0.0221543		PON2	7q21.3	0.0278976		STK35	20p13	0.0241714
TRPM3	9q21.12	0.0221703		CCDC7	10p11.22	0.027926		LOC101928516	---	0.0242373
KIAA1109	4q27	0.0221765		LOC100507654	---	0.0279482		GAP43	3q13.31	0.0242436
IRS4	Xq22.3	0.0222141		ESCO2	8p21.1	0.0279664		TXNDC9	2q11.2	0.0242776
NKX6-3	8p11.21	0.0222374		C17orf82	17q23.2	0.0279681		RBBP6	16p12.2	0.0243086
HBE1	11p15.5	0.0222427		GRHL1	2p25.1	0.0280217		RBMS1	2q24.2	0.0243793
MGC15885	15q22.2	0.0222902		CDON	11q24.2	0.02803		GNPAT	1q42	0.0243837
NOP9	14q12	0.0223315		CC2D1A	19p13.12	0.0281285		DUXAP8	14q11.2	0.0244102
RHOA	3p21.3	0.0224562		BEND7	10p13	0.0282573		ZNF804B	7q21.13	0.0244361
LEPROT	1p31.3	0.0225058		SOS1	2p21	0.0282896		FKBP4	12p13.33	0.0245102
CD200R1	3q13.2	0.0225246		ATG14	14q22.3	0.0283118		RIMS2	8q22.3	0.0245162
KEL	7q33	0.0225375		MYEOV2	2q37.3	0.0283262		AIG1	6q24.2	0.0245251
CYTH1	17q25	0.0225515		FOXP2	7q31	0.0283468		CYP19A1	15q21.1	0.0245563
DR1	1p22.1	0.0226967		IL11	19q13.3-q13.4	0.0284313		RFWD2	1q25.1-q25.2	0.0245604
IL10RA	11q23	0.0227505		PICALM	11q14	0.0284496		VAMP5	2p11.2	0.0246219
SOD2	6q25.3	0.0229408		HUS1B	6p25.3	0.0284884		SYNJ2	6q25.3	0.0246313
ENG	9q34.11	0.0229825		TMEM185A	Xq28	0.0284997		ADAM28	8p21.2	0.0246476
GIMAP1	7q36.1	0.0230679		P2RX7	12q24	0.0285078		ASAP1-IT2	---	0.0246717
FKBP4	12p13.33	0.023087		STOX1	10q22.1	0.0285211		TRPC6	11q22.1	0.0246922
MMRN1	4q22	0.0232577		MCM9	6q22.31	0.0285585		AKAP12	6q24-q25	0.0247664
C18orf21	18q12.2	0.023264		DGKB	7p21.2	0.0285692		ZNF148	3q21	0.0248307
NLRP12	19q13.42	0.0232897		IMMP2L	7q31	0.028635		NAMPT	7q22.3	0.0248716
AFAP1L1	5q32	0.0232953		DGKH	13q14.11	0.0288902		CCDC90B	11q14.1	0.0248722
CDON	11q24.2	0.0233106		L1CAM	Xq28	0.0289851		TRPM1	15q13.3	0.0248791
FGF7	15q21.2	0.0233361		WDR62	19q13.12	0.029238		CDKN1A	6p21.2	0.0248853
TBC1D26	17p11.2	0.0233492		PGPEP1	19p13.11	0.0292403		FILIP1L	3q12.1	0.0249364
CTSG	14q11.2	0.0233569		SOCS2	12q	0.0292711		HIRA	22q11.21	0.0249544
TYMP	22q13.33	0.023366		SLC30A3	2p23.3	0.0292845		PKIG	20q12-q13.1	0.0249591
SCTR	2q14.1	0.0233709		ZEB2	2q22.3	0.0293088		TOX	8q12.1	0.025015
GPR101	Xq26.3	0.023393		STXBP2	19p13.3-p13.2	0.0293571		MRC1	10p12.33	0.0251346
ADAMTS9	3p14.1	0.0234264		PVT1	8q24	0.0295406		ETV1	7p21.3	0.0251416
HCG18	6p21.3	0.0234451		FUS	16p11.2	0.0295573		RHOQ	2p21	0.0251628
JUND	19p13.2	0.0234754		RYBP	3p13	0.0295865		CLUAP1	16p13.3	0.0251843
LRPPRC	2p21	0.0234963		ZNF75D	Xq26.3	0.0295987		CUL3	2q36.2	0.0252394
AP1B1	22q12.2	0.0235174		CDK12	17q12	0.0296233		ND3	Xp22.1-p21.3	0.0252794
INTS4	11q14.1	0.0235454		RIMS3	1p34.2	0.0296522		MB	22q13.1	0.0253207
FLT3	13q12	0.0235551		GSS	20q11.2	0.0296716		MGC16275	17q25.1	0.0254183
FBLIM1	1p36.21	0.0235707		MITF	3p14.2-p14.1	0.0297128		SAE1	19q13.32	0.0254785
SGTA	19p13	0.0235863		TSPO	22q13.31	0.0297267		TATDN2	3p25.3	0.0255284
FLI1	11q24.1-q24.3	0.0235971		TFDP1	13q34	0.0297463		C8orf88	8q21.3	0.025533
SRCIN1	17q12	0.0236129		ZBED4	22q13.33	0.029788		LOC283788	---	0.0255693
GRID1	10q22	0.0236526		NEB	2q22	0.0297913		CD80	3q13.3-q21	0.0256101
NFATC4	14q11.2	0.0236617		CFB	6p21.3	0.029804		PDE4D	5q12	0.0256485
NNAT	20q11.2-q12	0.0236779		MLLT6	17q21	0.0298059		HSP90B1	12q24.2-q24.3	0.0256946
TPMT	6p22.3	0.023695		LOC101927314	---	0.0298215		RAB14	9q33.2	0.0257063
EBP	Xp11.23-p11.22	0.0237132		ARHGAP22	10q11.22	0.0298526		RAB33A	Xq26.1	0.0257187
DGKA	12q13.3	0.0237171		MAP3K3	17q23.3	0.0300173		LOC102723648	---	0.025806
SPATA17	1q41	0.0237487		MDM2	12q14.3-q15	0.0300264		IL7R	5p13	0.0259037
TMEM184B	22q12	0.0237683		MRGPRX3	11p15.1	0.0301872		IQSEC3	12p13.33	0.0259072
GUCY1B3	4q31.3-q33	0.0237899		GLS	2q32-q34	0.0302073		SRGAP2	1p11.2	0.0259255
RIN3	14q32.12	0.0238312		P2RX4	12q24.32	0.0303408		PRPH2	6p21.1	0.0260615
ADAMTS9-AS2	---	0.0238317		SDCBP	8q12	0.0303487		TMEM63A	1q42.12	0.0260899
LRP6	12p13.2	0.0238646		CLSPN	1p34.2	0.0303826		ZNF430	19p12	0.0260901
CKM	19q13.32	0.0238785		LOC100133920	2p11.1	0.0304477		LHFPL3-AS1	7q22.1	0.0261
SPAG9	17q21.33	0.0239051		SDHB	1p36.1-p35	0.0305061		GAS1	9q21.3-q22	0.0261312
LOC105372761	---	0.0239643		TAC4	17q21.33	0.0305527		COA1	7p13	0.0261391
LOC101929325	---	0.0239701		ADAMTS20	12q12	0.0305647		MAP3K5	6q22.33	0.0261889
LINC01120	2q21.1	0.0239747		UBA6	4q13.2	0.0306242		ST14	11q24-q25	0.0262011
SNX29	16p13.13-p13.12	0.0240024		SNX29	16p13.13-p13.12	0.0306464		FGL2	7q11.23	0.026228
TLR2	4q32	0.0240624		NFYC	1p32	0.0306505		LRRN4CL	11q12.3	0.0262302
PICALM	11q14	0.0240799		FAM200A	7q22.1	0.0306729		CLDN3	7q11.23	0.0262517
CLEC10A	17p13.1	0.0240833		EAF2	3q13.33	0.0307372		CTSS	1q21	0.0262736
DKK3	11p15.2	0.0241282		LOC105372366	---	0.0307425		GTF3A	13q12.3-q13.1	0.0263102
CEP57	11q21	0.0241517		KIF5C	2q23.1	0.0311042		GPAA1	8q24.3	0.0263917
FOLR2	11q13.3-q13.5	0.0241723		IFNLR1	1p36.11	0.0311478		ITIH5	10p14	0.0264247
CEP128	14q31.1	0.0242219		BMS1P20	22q11.22	0.0312398		PKP1	1q32	0.0264671
STK17B	2q32.3	0.0242259		NT5E	6q14-q21	0.0312914		SLC39A7	6p21.3	0.026472
OR1J2	9q34.11	0.024245		GNAI3	1p13	0.0312944		LOC142937	10p15.1	0.0265326
TM2D3	15q26.3	0.0242623		SLC16A5	17q25.1	0.0313049		EPB41L3	18p11.32	0.0266528
GALK2	15q21.1-q21.2	0.0242725		CPE	4q32.3	0.0313389		ZHX1-C8orf76	8q	0.0266589
GFPT2	5q34-q35	0.0243329		DNAJC6	1p31.3	0.0313931		ATP5SL	19q13.2	0.02667
LOC105372762	---	0.0243475		PDK3	Xp22.11	0.0314141		PKP4	2q24.1	0.0266709
NLRX1	11q23.3	0.0244171		SYT9	11p15.4	0.0314224		ELK4	1q32	0.0267311
SF3A1	22q12.2	0.0245166		ADAM22	7q21	0.0314873		CGNL1	15q21.3	0.0267898
LRRC43	12q24.31	0.024525		SPG7	16q24.3	0.0315049		LRP8	1p34	0.0268106
LINC01111	---	0.0246138		TMEM63A	1q42.12	0.0315134		FCRL2	1q21	0.026815
SRGAP2B	1p11.2	0.0247229		TMEM106A	17q21.31	0.0315184		LOC105377458	---	0.0268231
PKIG	20q12-q13.1	0.0247274		MAN2A2	15q26.1	0.0315451		VPS11	11q23	0.0268751
MAN2A1	5q21.3	0.0247353		HMOX1	22q13.1	0.0315545		GUCA1A	6p21.1	0.0269091
DKFZP434K028	11q12.2	0.0247954		COL25A1	4q25	0.0316306		ZMAT3	3q26.32	0.0269859
AGBL1	15q25.3	0.024821		FAM193A	4p16.3	0.0317389		FAM227B	15q21.2	0.026989
TRIM38	6p21.3	0.0248302		LAMP1	13q34	0.0317652		NGFR	17q21-q22	0.026992
LOC101927438	2p14	0.0248375		WDFY3-AS2	4q21.3	0.0317762		ADAM23	2q33	0.0270803
FOXP1	3p14.1	0.0248655		LOC646268	1q23.1	0.0317864		SMARCA1	Xq25	0.0270828
CCL3	17q12	0.0248831		SLC9B1	4q24	0.0320337		NET1	10p15	0.0271111
LMNA	1q22	0.0248879		PEX11A	15q26.1	0.032083		GABBR1	6p21.31	0.0271613
COX10-AS1	---	0.0248963		RAB21	12q21.1	0.0320839		WSCD1	17p13.3-p13.2	0.0271984
TCP11L1	11p13	0.024897		LINC00527	21q22.2	0.0321933		MCM8-AS1	---	0.0272442
PTK2	8q24.3	0.0249046		BTG1	12q22	0.0322172		FABP4	8q21	0.0272833
ADM	11p15.4	0.0249103		LARP4	12q13.12	0.0322468		SP4	7p15.3	0.0272977
ACOX3	4p15.3	0.0249759		LINC00927	15q25.1	0.0322598		TRADD	16q22	0.0273366
ZNF789	7q22.1	0.0249765		CASS4	20q13.31	0.0322874		MON1B	16q23.1	0.0273846
USH1G	17q25.1	0.0249789		TRIM42	3q23	0.0324107		RALB	2q14.2	0.0274043
NLGN4X	Xp22.33	0.0250612		DHCR24	1p32.3	0.0324552		NTNG1	1p13.3	0.0274524
CALD1	7q33	0.0251447		HIPK4	19q13.2	0.0324711		C21orf58	21q22.3	0.027584
KIN	10p14	0.0251769		CCDC9	19q13.32	0.0325246		ZNF207	17q11.2	0.0276113
HBG2	11p15.5	0.0251953		SVEP1	9q32	0.0326103		DHX34	19q13.3	0.0276318
TPST2	22q12.1	0.0252274		LOC105371232	---	0.0326321		CDO1	5q23.2	0.0276611
VCAM1	1p32-p31	0.0252415		ARHGEF2	1q21-q22	0.0327279		NBAS	2p24	0.0277053
GABBR1	6p21.31	0.0252786		MVD	16q24.3	0.0327475		CLDN7	17p13.1	0.0277689
TNFSF12	17p13	0.0252975		WDHD1	14q22.2	0.0327695		ERCC8	5q12.1	0.027815
SH2D3C	9q34.11	0.0253353		ERCC1	19q13.32	0.0328075		DPYSL2	8p22-p21	0.0278209
FAM188A	10p13	0.0253474		MVB12B	9q33.3	0.0328298		SVEP1	9q32	0.0279732
ADAMTS5	21q21.3	0.025363		SYN1	Xp11.23	0.0328727		ACLY	17q21.2	0.0279763
HOXB5	17q21.3	0.0253948		C1orf61	1q22	0.0329135		HBA1	16p13.3	0.028003
C22orf15	22q11.23	0.0254478		CTSLP8	9q22.1	0.0329796		FARP1	13q32.2	0.0281296
RPLP1	15q22	0.0254726		NFE2L2	2q31	0.0329834		ATP6V1C1	8q22.3	0.0281702
GSN	9q33	0.025494		LOC101929114	7q11.21	0.0330618		MKNK1	1p33	0.0281717
SETD5	3p25.3	0.0255975		LOC105377468	---	0.0330656		CFAP47	Xp21.1	0.0281749
NGFR	17q21-q22	0.0256521		PSMA1	11p15.1	0.0330869		CASP10	2q33-q34	0.0282006
LOC101929151	---	0.0256552		GPSM1	9q34.3	0.0331206		LOC554206	16p12.1	0.0282176
ELMO1	7p14.1	0.02571		MYOZ3	5q33.1	0.0331562		ZNF592	15q25.3	0.0282287
GTSE1	22q13.2-q13.3	0.0257183		NT5DC2	3p21.1	0.0332729		B4GALT1	9p13	0.0282832
RARS	5q35.1	0.0257353		RPL17-C18orf32	18q21.1	0.0333112		HELQ	4q21.23	0.0282889
HFE	6p21.3	0.0257736		TMEM109	11q12.2	0.0333997		TMEM11	17p11.2	0.0283163
PCNXL2	1q42.2	0.0257917		GHR	5p13-p12	0.0334053		RP2	Xp11.3	0.0283837
NLRP1	17p13.2	0.0258009		PTGS1	9q32-q33.3	0.0334093		ST3GAL2	16q22.1	0.0284051
TET2	4q24	0.0258076		NRF1	7q32	0.033414		TTC23	15q26.3	0.028412
PCSK5	9q21.3	0.0258134		MLXIP	12q24.31	0.0334191		RHBDD3	22q12.2	0.0284603
ZBTB17	1p36.13	0.0258678		NRAP	10q24-q26	0.0334288		IL17RA	22q11.1	0.0284797
GINS1	20p11.21	0.0258783		MROH1	8q24.3	0.0334409		LRRC17	7q22.1	0.02848
IGFBP4	17q21.2	0.0258852		ATXN3	14q21	0.0334751		2018-09-09	17q25	0.0285311
PXK	3p14.3	0.0259143		ARPC1A	7q22.1	0.0335137		PIK3CG	7q22.3	0.0285814
ZNF81	Xp11.23	0.0259328		NR2F1-AS1	5q15	0.0335194		DKK3	11p15.2	0.0285872
WIPI2	7p22.1	0.0259742		ARHGAP35	19q13.3	0.0335513		IL13RA1	Xq24	0.0286387
LOC101927411	19q13.11	0.0259837		CUL3	2q36.2	0.0335883		HNRNPA0	5q31	0.0286636
LOC101929473	11q24.2	0.0260913		MAATS1	3q13.33	0.0335927		TRAPPC13	5q12.3	0.0286929
KRTAP10-11	21q22.3	0.0260999		LINC00382	13q31.1	0.0336108		ARHGAP1	11p11.2	0.0287034
APBA1	9q21.12	0.0261863		NAP1L3	Xq21.3-q22	0.0336496		WDR62	19q13.12	0.0287238
HRSP12	8q22	0.0261924		NFS1	20q11.22	0.0337012		CDH5	16q22.1	0.0287255
C9orf16	9q34.1	0.0262052		NUDCD3	7p13-p12	0.0337441		CLEC2B	12p13-p12	0.0287375
C2	6p21.3	0.0262131		DUSP19	2q32.1	0.0337991		SPIRE2	16q24	0.028739
SETX	9q34.13	0.026216		RABIF	1q32.1	0.0338013		STK10	5q35.1	0.0287679
DNM2	19p13.2	0.0262203		TNFAIP2	14q32	0.0338501		VWF	12p13.3	0.0287951
TMEM94	17q25.1	0.0262434		LOC101930370	---	0.0338626		WDR1	4p16.1	0.0288307
CFI	4q25	0.0262779		FHAD1	1p36.21	0.0339052		VAC14-AS1	16q22.2	0.028961
G3BP1	5q33.1	0.0262915		LARP1B	4q28.2	0.0339711		PRKX	Xp22.3	0.0290066
GYPC	2q14-q21	0.0263015		PCM1	8p22-p21.3	0.0339799		TMEM192	19q13.41	0.0290263
B3GNT6	11q13.4	0.0263325		CHRNB2	1q21.3	0.0340027		MYO6	6q13	0.0290898
CANX	5q35	0.0263386		CCDC66	3p14.3	0.034023		GABRE	Xq28	0.0291186
INPP4B	4q31.21	0.026349		ENDOU	12q13.1	0.0340279		RPRML	17q21.32	0.0291548
RPS21	20q13.3	0.0263547		GPD1	12q13.12	0.0340487		GPRASP1	Xq22.1	0.0292032
LOC105376292	---	0.0263639		HEXIM1	17q21.31	0.0340921		KIF23	15q23	0.0292297
TCN1	11q11-q12	0.0263694		LINC01425	---	0.0341228		TDO2	4q31-q32	0.0293151
BNIP1	5q33-q34	0.0264089		ZBTB7B	1q21.3	0.0341394		TNNT2	1q32	0.0293249
HOPX	4q12	0.0264191		SDCBPP2	8q13.3	0.0341402		SOCS3	17q25.3	0.0293848
TMEM63A	1q42.12	0.0264206		MVK	12q24	0.0341782		CD209	19p13	0.0293875
TGFB1	19q13.1	0.0264396		MED14	Xp11.4	0.0342881		WWTR1-AS1	3q25.1	0.0293982
SRGN	10q22.1	0.026446		CLEC4F	2p13.3	0.0342884		ALDH3A2	17p11.2	0.0294583
VRK3	19q13	0.0264621		GABRG2	5q34	0.0343378		IDI1	10p15.3	0.0294681
ZFP36L2	2p22.3-p21	0.0264695		RGS12	4p16.3	0.0343425		NLRP3	1q44	0.0295417
DIMT1	5q12.1	0.0265486		RPS7	2p25	0.0343436		UGGT2	13q32.1	0.0295462
KCND1	Xp11.23	0.026567		KLF6	10p15	0.0343552		NAV2	11p15.1	0.029587
LOC100506679	22q13.2	0.0266186		ING2	4q35.1	0.0343657		PRKX	Xp22.3	0.0295998
ARID5B	10q21.2	0.0266577		PLK4	4q28	0.034382		CTSK	1q21	0.0297565
CCDC85B	11q12.1	0.0266896		LOC339988	4p16.1	0.0343978		SNAI3-AS1	16q24.3	0.0298031
KRBA2	17p13.1	0.0267189		TRIB1	8q24.13	0.0344407		CMAHP	6p21.32	0.0298442
ACP5	19p13.2	0.0267384		ASXL2	2p24.1	0.0344496		ACVR2B	3p22	0.0298721
NRG1	8p12	0.0267882		CDC42EP1	22q13.1	0.0346278		OMD	9q22.31	0.0300251
AOAH	7p14.2	0.0268052		NTRK3	15q25	0.0346495		NDUFS2	1q23	0.03006
CAD	2p22-p21	0.0268111		LYN	8q13	0.0346859		TEC	4p12	0.0301086
FGFR1OP2	12p11.23	0.026818		KCNQ3	8q24	0.0347127		CYBB	Xp21.1	0.0301281
TP53I11	11p11.2	0.0269507		CDKAL1	6p22.3	0.0347267		ULK2	17p11.2	0.0301576
GNAQ	9q21	0.0269815		CLEC7A	12p13.2	0.0347481		CHST15	10q26	0.0301617
VPS50	7q21.3	0.0270201		LINC01192	3q26.1	0.0347799		JUN	1p32-p31	0.0301668
LEMD1-AS1	1q32.1	0.0270489		ANKRD30B	18p11.21	0.034825		PTPRD-AS1	9p24.1	0.0302356
SRPR	11q24.2	0.0270596		CDK5R2	2q35	0.0349021		CRTAM	11q24.1	0.030269
ART1	11p15	0.0270611		DCTN1-AS1	2p13	0.034945		KRT19	17q21.2	0.0303136
LOC100271832	2p22.3	0.0270768		LRRC43	12q24.31	0.0350056		COX1	---	0.0303702
INPP4A	2q11.2	0.0270859		CYB5D1	17p13.1	0.0350984		FGF18	5q34	0.0304135
ATP6V0C	16p13.3	0.0271194		ZNF443	19p13.2	0.0351658		TTC37	5q15	0.0304853
C21orf58	21q22.3	0.0271262		WDR37	10p15.3	0.0352117		GNG11	7q21	0.0305912
ZNF391	6p22.1	0.0271791		MAP4K2	11q13	0.0352218		GIMAP1	7q36.1	0.0306423
LEPR	1p31	0.0272061		AFF3	2q11.2-q12	0.0352874		SEMA3A	7p12.1	0.0306627
S100A12	1q21	0.0272096		TMEM147	19q13.1	0.0352907		CARD8	19q13.33	0.0307533
ANXA5	4q27	0.0272579		LOC101929450	8p12	0.0353035		BCAP31	Xq28	0.0307622
ZNF215	11p15.4	0.0273361		SLIT3	5q35	0.0353486		C14orf37	14q23.1	0.0308044
2018-03-01	4q32.2	0.0273891		CELF1	11p11	0.0353589		NDUFS4	5q11.1	0.0308178
TTC37	5q15	0.0274075		DIO3OS	14q32.31	0.0353858		LEKR1	3q25.31	0.0310089
FBXO22	15q24.2	0.0274678		C14orf1	14q24.3	0.0353935		CFTR	7q31.2	0.0310136
ASXL2	2p24.1	0.0274707		SRRM2	16p13.3	0.0354056		COX5B	2q11.2	0.0310139
ARSA	22q13.33	0.0274795		ARMCX5	Xq22.1-q22.3	0.035441		IFNAR1	21q22.11	0.0310256
PRKACB	1p31.1	0.0275706		NEBL	10p12	0.0354436		MTERF4	2q37.3	0.0310708
CCDC149	4p15.2	0.0276777		ITGA9	3p21.3	0.0354437		ATP2B2	3p25.3	0.0311321
CEP162	6q14.3	0.0276803		CEP70	3q22.3	0.0355527		TAGLN2	1q21-q25	0.0311581
OR10A3	11p15.4	0.0276956		ZNF33B	10q11.2	0.0355983		PTH2R	2q33	0.0312217
IFITM2	11p15.5	0.0277279		DDX11-AS1	---	0.0356221		CXorf58	Xp22.11	0.0312668
RMDN2	2p22.2	0.0277504		CORO6	17q11.2	0.0356352		LCP2	5q35.1	0.0313013
SH3PXD2B	5q35.1	0.027763		FCGR3A	1q23	0.0356463		WASF3	13q12	0.0313274
LRRC15	3q29	0.0277718		RAB40B	17q25.3	0.0356683		SYN2	3p25	0.0313459
FHL1	Xq26	0.0278376		LRRC27	10q26.3	0.0356852		RYK	3q22	0.03138
GNA11	19p13.3	0.027846		SPIRE2	16q24	0.035691		PSMB8-AS1	---	0.0313806
ANKRD28	3p25.1	0.0278601		STON2	14q31.1	0.0357055		ZNF222	19q13.2	0.0314024
DUSP8	11p15.5	0.0279331		SNRPE	1q32	0.0357077		RPRD1A	18q12.2	0.0314028
KIAA0101	15q22.31	0.0279601		PDE10A	6q26	0.0357294		USP7	16p13.3	0.0315793
2018-03-02	1q41	0.0280902		GUCA1A	6p21.1	0.0357294		USP36	17q25.3	0.0315875
BRAF	7q34	0.0280964		QPRT	16p11.2	0.0357685		RPL12	9q34	0.0316917
SON	21q22.11	0.0281174		FCRL5	1q21	0.035841		FAS	10q24.1	0.0317192
MAP4	3p21	0.0281178		IRGQ	19q13.31	0.0358421		HNRNPA3	10q11.21	0.0317476
FAM185A	7q22.1	0.0281487		RECK	9p13.3	0.0359201		PSKH2	8q21.3	0.03176
TENM3	4q35.1	0.028222		FAM212B	1p13.2	0.0359881		FAM120A	9q22.31	0.0318075
VWF	12p13.3	0.028268		RPL10A	6p21.31	0.0360559		HMCES	3q21.3	0.0318824
BMX	Xp22.2	0.0282702		KCTD18	2q33.1	0.0360732		UVSSA	4p16.3	0.0319309
RUFY3	4q13.3	0.0282729		HBEGF	5q23	0.0361038		WBP4	13q14.11	0.0320016
RAB35	12q24.31	0.0283409		RTN4IP1	6q21	0.0362599		THUMPD3-AS1	3p25.3	0.0320075
DSCR3	21q22.2	0.0283488		CAPG	2p11.2	0.0362623		MAP3K2	2q14.3	0.032026
MVD	16q24.3	0.0283672		SMAD6	15q22.31	0.0362804		PRKCH	14q23.1	0.0321034
BHLHE40	3p26	0.0283869		RGS20	8q11.23	0.0362871		MLF2	12p13	0.0321313
UPP1	7p12.3	0.0284445		KATNBL1	15q14	0.0363193		MEDAG	13q12.3	0.0321961
COX6C	8q22.2	0.0285174		ST7L	1p13.2	0.0363643		CTSB	8p22	0.0322143
LINC00619	10q11.21	0.0285483		SLC23A2	20p13	0.0363734		MAMSTR	19q13.33	0.0322677
FEZ2	2p21	0.0285786		CSH1	17q24.2	0.0364085		MDN1	6q15	0.0323763
CD53	1p13	0.0286736		MANEA	6q16.1	0.0364093		FBXO8	4q34.1	0.0323896
NOX5	15q23	0.028687		ROR1	1p31.3	0.0364483		SERP2	13q14.11	0.0324664
SUPT6H	17q11.2	0.0287564		MCPH1	8p23.1	0.0364723		LOC101927787	1q42.3	0.0325073
BAG6	6p21.3	0.0287569		CAMSAP3	19p13.2	0.0364895		MYL12A	18p11.31	0.03257
MCPH1	8p23.1	0.0288299		CFAP97	4q35.1	0.0365422		FAM160B1	10q25.3	0.0326308
CALCOCO2	17q21.32	0.0288642		SFTPC	8p21	0.036642		MFNG	22q12	0.0326457
TMEM106A	17q21.31	0.0288833		GBF1	10q24	0.0366533		ZBTB11	3q12.3	0.0326684
LOC642852	21q22.3	0.0289201		PDCL	9q12-q13	0.0366657		WDFY3-AS2	4q21.3	0.0327499
COPB2	3q23	0.0290246		NCOA3	20q12	0.0367444		ITGB8	7p21.1	0.032816
NAP1L4	11p15.5	0.0290291		OR1C1	1q44	0.0367525		NOTCH2	1p13-p11	0.0328331
DCT	13q32	0.029065		B3GNT5	3q28	0.0368774		GLI2	2q14	0.0328454
LOC100506314	---	0.0290775		GSTM3	1p13.3	0.0368839		RAD52	12p13-p12.2	0.0328776
SRF	6p21.1	0.0291273		PCMT1	6q25.1	0.0369169		LACC1	13q14.11	0.0329047
HDAC9	7p21.1	0.029216		LINC01020	5p15.32	0.0370688		MSH6	2p16	0.0330505
ARL1	12q23.2	0.0292238		SOBP	6q21	0.0370724		GTSE1	22q13.2-q13.3	0.0331037
KLF12	13q22	0.0292562		HSD17B12	11p11.2	0.0371675		PSMB2	1p34.2	0.0331079
HOXD9	2q31.1	0.0294112		ZNF483	9q31.3	0.0371736		TFEC	7q31.2	0.0331349
MAPK12	22q13.33	0.0294162		SP4	7p15.3	0.0371869		ELOVL5	6p12.1	0.0331363
CEP350	1q25.2	0.0294248		RPS11	19q13.3	0.0372783		FPGT	1p31.1	0.0331533
2018-09-11	4q21.1	0.0295316		CEP295	11q21	0.037327		METTL1	12q13	0.0331543
CT83	Xq23	0.0295481		STOML1	15q24.1	0.0373582		MST1R	3p21.3	0.0331817
GTPBP1	22q13.1	0.0295495		PTPRO	12p13.3-p13.2|12p13-p12	0.037367		CALCRL	2q32.1	0.0331887
KDM5B	1q32.1	0.0296223		UBB	17p12-p11.2	0.0373902		LOXL2	8p21.3	0.0332216
LINC00491	5q21.2	0.0296539		GRID1	10q22	0.037402		BTN3A3	6p21.3	0.0333122
DNAH1	3p21.1	0.0296615		CLK3	15q24	0.0374103		FAM83B	6p12.1	0.0333303
IQGAP3	1q21.3	0.0297057		ACSL4	Xq22.3-q23	0.0374954		PDCD2	6q27	0.0333407
MYOZ3	5q33.1	0.0297963		MKL2	16p13.12	0.0374983		MAST4	5q12.3	0.0334387
CDC42EP1	22q13.1	0.0297993		NOX5	15q23	0.0375849		SULT1A1	16p12.1	0.0334422
KRT73	12q13.3	0.0298141		TTF1	9q34.13	0.0375924		PJA2	5q21.3	0.033458
GPATCH2	1q41	0.0298242		C14orf105	14q22.3	0.0376986		LIN9	1q42.12	0.0334764
MAPK1	22q11.21	0.0298563		BCKDK	16p11.2	0.0377152		ORC2	2q33	0.0334922
CELSR1	22q13.3	0.0299157		COX7B	Xq21.1	0.0377698		SH2B3	12q24	0.033523
ZNF599	19q13.11	0.0299204		GADL1	3p24.1-p23	0.0377935		ELF3	1q32.2	0.0335309
KCTD7	7q11.21	0.0299489		LOC101928844	19p13.3	0.0378678		CD2BP2	16p11.2	0.0335324
TNNT3	11p15.5	0.0300266		LOC101929372	22q11.21	0.0378692		ZNF626	19p12	0.0335361
CLUAP1	16p13.3	0.0300884		MPP7	10p12.1	0.0378937		CRISPLD2	16q24.1	0.0335425
LGALS9	17q11.2	0.0301328		LINC00441	13q14.2	0.037906		SSR1	6p24.3	0.0336457
CATSPER1	11q12.1	0.030148		HFE	6p21.3	0.037953		ARHGEF9	Xq11.1	0.0336495
IQSEC3	12p13.33	0.0302248		PHF20	20q11.22-q11.23	0.0379572		DENND4A	15q22.31	0.0336569
ARF6	14q21.3	0.0302268		PVR	19q13.2	0.0380532		2018-03-10	17q23.2	0.0337317
AREL1	14q24.3	0.0302282		LSM14B	20q13.33	0.0380711		TOMM20	1q42	0.0338351
TCTEX1D1	1p31.3	0.0302622		BPI	20q11.23	0.0380959		SYNRG	17q12	0.0339564
ESYT3	3q22.3	0.0302629		PIP4K2B	17q12	0.0381255		ETFA	15q23-q25	0.0340512
FYB	5p13.1	0.0302811		SLC30A9	4p13	0.0381733		GNS	12q14	0.0340561
PPP5D1	---	0.0303058		OFCC1	6p24.3	0.0382162		AOX1	2q33	0.0340831
NR2C1	12q22	0.0303332		SERPINB6	6p25	0.0382456		EIF1B	3p22.1	0.0341686
LOC101928985	---	0.0303769		CEP68	2p14	0.0382497		ADD2	2p13.3	0.0341711
CDH5	16q22.1	0.0303966		TIRAP	11q24.2	0.0383766		RHOJ	14q23.2	0.0341791
IDH3A	15q25.1-q25.2	0.0304644		JUND	19p13.2	0.0383766		LYNX1	8q24.3	0.0342398
LOC728084	12q21.33	0.0304932		C2	6p21.3	0.0383932		STIM1	11p15.5	0.0343546
ACTR2	2p14	0.0304951		SOX5	12p12.1	0.0384214		ALPL	1p36.12	0.0344189
GPR173	Xp11	0.0305694		SLCO6A1	5q21.1	0.038462		SKIV2L2	5q11.2	0.0344433
HGSNAT	8p11.1	0.0305697		YWHAEP7	17q12	0.0384654		ZNF585A	19q13.12	0.034534
TFEC	7q31.2	0.0306754		SYPL1	7q22.3	0.0384699		TOMM40	19q13	0.0345898
VGLL1	Xq26.3	0.030747		SARS	1p13.3	0.0387904		VCAM1	1p32-p31	0.0346298
DENND1B	1q31.3	0.0308494		CCDC144B	17p11.2	0.0388014		AMPH	7p14-p13	0.0346754
RANBP2	2q12.3	0.0308822		RANBP2	2q12.3	0.0389461		GOLGA6L1	15q11.2	0.0347027
PFN4	2p23.3	0.0309007		LOC101927495	---	0.0389488		CDC25B	20p13	0.0347238
PRMT2	21q22.3	0.0309111		BBX	3q13.1	0.0389954		PTGFR	1p31.1	0.0347428
THBS1	15q15	0.0309612		NF2	22q12.2	0.0390004		PALM2-AKAP2	9q31.3	0.0348479
CD5	11q13	0.0309752		PRR14	16p11.2	0.0390038		BRD8	5q31	0.0348832
MOCS1	6p21.3	0.0309948		ASMTL-AS1	Xp22.33; Yp11.32	0.039161		FLT3LG	19q13.3	0.0349689
FBXO10	9p13.2	0.0309965		ND2	---	0.0392365		GAS1RR	---	0.0349756
HECW1-IT1	7p14.1	0.0310027		DEFB106A	8p23.1	0.0392683		GNG2	14q21	0.034982
DNAJC6	1p31.3	0.0310282		PPP1R3B	8p23.1	0.039345		INHBB	2cen-q13	0.0350377
SEMA5A	5p15.2	0.0310293		ZKSCAN3	6p22.1	0.0393823		HRG	3q27	0.0350662
RPS10	11p11.2	0.0310322		LRTM2	12p13.33	0.0394391		PPIA	7p13	0.0351299
EIF4G2	11p15	0.0310403		EXOSC1	10q24	0.0394572		PIAS2	18q21.1	0.035136
RHOF	12q24.31	0.0310426		PKD1	16p13.3	0.0395297		DEFB119	20q11.21	0.035146
C15orf32	15q26.1	0.0310567		MAP1A	15q15.3	0.0395399		MMP3	11q22.3	0.0351483
LIPC	15q21-q23	0.0310673		ZNF548	19q13.43	0.0395537		ETV5	3q28	0.0351713
PTH1R	3p22-p21.1	0.0310771		SH3PXD2B	5q35.1	0.0396294		IL12RB1	19p13.1	0.035189
SLIT3	5q35	0.0310976		UEVLD	11p15.1	0.0396393		TSPEAR-AS2	21q22.3	0.0352478
SPATA31E1	9q22.1	0.0311077		CXCL2	4q21	0.0396995		VASH1	14q24.3	0.0352802
FGD1	Xp11.21	0.0311709		MCTP2	15q26.2	0.0397096		BIRC5	17q25	0.0353034
MYL12A	18p11.31	0.0312045		SLC6A11	3p25.3	0.0397724		G3BP1	5q33.1	0.035313
CXCR2	2q35	0.0312181		JPX	Xq13.2	0.0398197		HNRNPA2B1	7p15	0.0353759
MPP7	10p12.1	0.0312354		SGSH	17q25.3	0.0398449		AOC3	17q21	0.0354033
MBNL2	13q32.1	0.0312951		HSD17B1	17q11-q21	0.0399126		EBP	Xp11.23-p11.22	0.0354137
KIAA1652	---	0.0313214		TAB3	Xp21.2	0.0399286		LOC100129455	2q31.1	0.0354547
TACC2	10q26	0.0313664		EML2	19q13.32	0.0399679		PCYT1B	Xp22.11	0.0355073
RABGAP1L	1q24	0.0313889		GALC	14q31	0.0401188		PPP3CA	4q24	0.0355121
YLPM1	14q24.3	0.0314222		MC1R	16q24.3	0.040163		IREB2	15q25.1	0.0355969
LINC00944	12q24.32	0.0314227		ANKH	5p15.1	0.0401879		ZNF826P	19p12	0.0356153
ETS1	11q23.3	0.0314507		OSGIN2	8q21	0.0402319		SRSF1	17q22	0.0356561
FSTL4	5q31.1	0.03151		PLD1	3q26	0.0403044		SIRPA	20p13	0.0356951
MIS18BP1	14q21.2	0.0315455		MYT1L	2p25.3	0.0403188		WDFY2	13q14.3	0.0357167
PVT1	8q24	0.0315827		TMEM37	2q14.2	0.04033		INTS10	8p21.3	0.0357399
OR13C4	9q31.1	0.0315887		GRAPL	17p11.2	0.0404085		PREX2	8q13.2	0.0357534
FOSL1	11q13	0.031593		LRRIQ3	1p31.1	0.0404205		NDST2	10q22	0.0358368
ZMYM2	13q11-q12	0.0316064		PDLIM7	5q35.3	0.0404377		HRH1	3p25	0.0358643
PKN1	19p13.12	0.0316173		AREG	4q13.3	0.0404659		TTN	2q31	0.0358754
CKAP5	11p11.2	0.0316914		C3orf79	3q25.2	0.0405159		STEAP4	7q21.12	0.0359086
CMTM3	16q21	0.0317075		MAP2K5	15q23	0.0405315		EBF2	8p21.2	0.0359227
VEGFB	11q13	0.0317352		CYGB	17q25.1	0.0405329		ICA1	7p22	0.0359263
COIL	17q22	0.0317404		NDST4	4q26	0.0406056		ADGRG6	6q24.1	0.035957
PSEN1	14q24.3	0.0317465		KHK	2p23.3	0.0406215		LOC101927870	---	0.0360005
PDXDC1	16p13.11	0.031775		KDELR1	19q13.3	0.0406321		STX8	17p12	0.0360446
ARRB2	17p13	0.0317899		PTH1R	3p22-p21.1	0.0406599		P4HA3	11q13.4	0.0360835
DUOXA1	15q21.1	0.0319043		LOC100996419	---	0.0406793		HERC3	4q21	0.0360898
CD33	19q13.3	0.0319262		TSTA3	8q24.3	0.0406941		ZNF253	19p13.11	0.0361114
CEP164	11q23.3	0.0319434		ELK4	1q32	0.0406995		ME3	11cen-q22.3	0.0361321
ARID3A	19p13.3	0.0321096		ACTG2	2p13.1	0.0408234		NPAS2	2q11.2	0.0361407
LOC283352	12q24.33	0.0321102		PTPRS	19p13.3	0.0408238		GBAS	7p12	0.0361787
LOC101927657	8q24.21	0.0321134		CTRC	1p36.21	0.0408356		KALRN	3q21.2	0.0361826
LOC100130417	1p36.33	0.0322017		OSMR	5p13.1	0.0408362		PICK1	22q13.1	0.0362306
SF1	11q13	0.0322085		DTNA	18q12	0.0408812		ELMOD2	4q31.1	0.036267
LOC105374690	---	0.0322121		RAPGEF4	2q31-q32	0.0409226		TIAL1	10q	0.0362695
LRMP	12p12.1	0.0322618		CGREF1	2p23.3	0.0409426		PTPRB	12q15-q21	0.0363264
SPG7	16q24.3	0.0322677		DPP4	2q24.3	0.0409466		RTEL1-TNFRSF6B	20q13.3	0.0363269
TMTC3	12q21.32	0.0322928		LRPAP1	4p16.3	0.0409717		SNED1	2q37.3	0.0363815
CRCP	7q11.21	0.0323197		MS4A3	11q12.1	0.0410888		GRK5	10q26.11	0.0364097
TTL	2q13	0.0323403		KLF3-AS1	4p14	0.0410997		LOC284926	22q13.31	0.0365248
CALB1	8q21.3	0.0323475		ZBTB26	9q33.2	0.0411202		F10	13q34	0.036572
BCL2L13	22q11.1	0.0323511		WASH1	9p24.3	0.041262		STK11	19p13.3	0.0367017
PLSCR1	3q23	0.0323702		PDE4B	1p31	0.0412764		ALKBH1	14q24.3	0.0367191
CYB5R3	22q13.2	0.0325776		WBSCR16	7q11.23	0.0413164		CACNA2D4	12p13.33	0.0367203
PDLIM7	5q35.3	0.0326226		SRCAP	16p11.2	0.04133		ALG13	Xq23	0.0367308
2018-12-01	9q32	0.0326688		DAPK2	15q22.31	0.0413383		SERPINF1	17p13.3	0.0368082
PF4	4q12-q21	0.0327422		IQCH	15q23	0.0414811		CLDN4	7q11.23	0.0368332
GTF2A2	15q22.2	0.0327503		FUBP1	1p31.1	0.0415305		IMPG1	6q14.2-q15	0.0368607
ZMYM4	1p32-p34	0.0328118		LINC00691	3p24.2	0.041571		TFDP2	3q23	0.0368775
TAGLN	11q23.2	0.0328541		LOC105375531	---	0.0416046		CLK4	5q35	0.0368867
PKP4	2q24.1	0.0328776		NOVA2	19q13.3	0.0416582		ARHGAP27	17q21.31	0.0368964
TBX5	12q24.1	0.0328934		ITGB3BP	1p31.3	0.041675		SNX2	5q23	0.0369559
HIF1A	14q23.2	0.0329025		RPS10	6p21.31	0.0417029		FOXN3	14q31.3	0.0369729
DNAJB4	1p31.1	0.0329045		CKMT1A	15q15	0.0417118		CLEC4G	19p13.2	0.0369875
ABCD4	14q24.3	0.0329067		PRM1	16p13.2	0.0417325		FAT3	11q14.3	0.0369937
ORC4	2q22-q23	0.0329235		CSPG4	15q24.2	0.0418065		SLC29A1	6p21.1	0.0369943
IPO7	11p15.4	0.032939		ZNF547	19q13.43	0.0418639		TLL1	4q32.3	0.0370149
GNAI2	3p21.31	0.0329951		STARD3	17q11-q12	0.0418807		SV2A	1q21.2	0.037022
CASP8	2q33-q34	0.0330058		C20orf181	20q13.33	0.0419607		ILF2	1q21.3	0.0370411
ATG7	3p25.3	0.0330114		DEFB124	20q11.1	0.0420782		CADPS	3p14.2	0.0370416
GNG2	14q21	0.0330675		LTBP4	19q13.1-q13.2	0.0421834		ZNF518A	10q24.1	0.0370872
CPT1A	11q13.2	0.0331179		NR1D1	17q11.2	0.042185		LIFR	5p13-p12	0.0371234
SPERT	13q14.13	0.0331206		SCAMP3	1q21	0.0421978		ATP1A2	1q23.2	0.037238
ADAMTS6	5q12	0.0331587		DUSP18	22q12.2	0.042263		TARDBP	1p36.22	0.0372468
BMP1	8p21.3	0.0331774		G3BP1	5q33.1	0.0422651		BDH1	3q29	0.0373169
ZNF398	7q36.1	0.0331862		BUD31	7q22.1	0.0422922		PTPRC	1q31-q32	0.0373505
PDCD2	6q27	0.0332279		HSPA6	1q23	0.0423102		RUSC1-AS1	1q22	0.0373884
TMEM74	8q23.1	0.0332764		CD209	19p13	0.0423139		NFYA	6p21.3	0.0374851
SLA2	20q11.23	0.0333283		STK24	13q31.2-q32.3	0.0423259		ZC3H11A	6q12	0.0375974
GATB	4q31.3	0.0335008		LOC101929384	12p13.33	0.0423832		RGS13	1q31.2	0.0376046
TP73-AS1	1p36.32	0.0335607		WNT9A	1q42	0.0424204		C14orf1	14q24.3	0.0376472
ATP4B	13q34	0.0336053		GPR26	10q26.13	0.0424768		PLA2G1B	12q24.31	0.0376973
SNED1	2q37.3	0.0336227		SSBP2	5q14.1	0.0426933		MSI2	17q22	0.0377229
TMEM171	5q13.2	0.0336722		CALB2	16q22.2	0.0427006		MST1	3p21	0.0377587
ASMTL-AS1	Xp22.33; Yp11.32	0.033682		LOC101928602	---	0.0427162		PIGC	1q23-q25	0.0378416
NBAS	2p24	0.0337088		RPS6KA5	14q31-q32.1	0.0427279		AGFG2	7q22.1	0.0378506
CSTF3	11p13	0.0337257		ITGA11	15q23	0.0427349		XPNPEP2	Xq25	0.0379022
EFCAB14	1p33	0.0337597		ALDH6A1	14q24.3	0.0427606		RNF207	1p36.31	0.0379139
LYZ	12q15	0.0337719		CTSL	9q21.33	0.0427757		PIEZO1	16q24.3	0.0381355
LMOD1	1q32	0.0337783		GIT2	12q24.1	0.0428021		SSH1	12q24.11	0.0381467
PRPF4B	6p25.2	0.0337864		DIAPH3-AS1	---	0.0428107		SMAD4	18q21.1	0.0382421
ACSF3	16q24.3	0.033803		CACNA1D	3p14.3	0.0428159		KIAA1109	4q27	0.0383183
CFP	Xp11.4	0.0338193		MSRB3	12q14.3	0.0429005		SPINK1	5q32	0.0383698
IFNL2	19q13.13	0.0338281		FAM159A	1p32.3	0.0429794		LY96	8q21.11	0.0383731
NFX1	9p13.3	0.0338673		LOC100421171	---	0.0429843		ZKSCAN5	7q22	0.038416
MCAM	11q23.3	0.0339061		SLC33A1	3q25.31	0.0429865		TBC1D9B	5q35.3	0.0384247
ZSCAN10	16p13.3	0.0339268		SCN8A	12q13	0.0430022		RASEF	9q21.32	0.0384313
SHANK2	11q13.2	0.0340531		PPIL2	22q11.21	0.0430229		CHD2	15q26	0.0385567
C10orf128	10q11.23	0.0341168		MT1H	16q13	0.043031		SLC9A7	Xp11.3|Xp11.3	0.0385973
SYN2	3p25	0.0341381		ENPP1	6q22-q23	0.0431548		B4GALNT2	17q21.32	0.0386301
GRN	17q21.32	0.0343303		CTNNAL1	9q31.2	0.0431801		ATXN3	14q21	0.038678
LOC100505635	6p21.2	0.0344386		IRS4	Xq22.3	0.0432376		C7	5p13	0.0387075
IL11	19q13.3-q13.4	0.0344525		NME5	5q31	0.0432871		ITSN1	21q22.1-q22.2	0.0387221
PKM	15q22	0.0344672		NDST1	5q33.1	0.0433663		KIF14	1q32.1	0.0387624
TFAP2A-AS1	6p24.3	0.0344741		EFCAB6	22q13.2	0.0434294		LOC100288721	3q13.13	0.0387637
SSMEM1	7q32.2	0.0345731		RMST	12q23.1|12q21	0.043469		TRAPPC3	1p34.3	0.038798
MTIF2	2p16.1	0.034593		GOLGA8IP	15q11.2	0.0435484		PTPRK	6q22.2-q22.3	0.0388922
UBE3D	6q14.1	0.0346011		RALB	2q14.2	0.0435818		CYP24A1	20q13	0.0389132
STARD3	17q11-q12	0.0346191		IRF5	7q32	0.043586		P2RY14	3q24-q25.1	0.0389327
ZNF443	19p13.2	0.0346353		DYNLRB1	20q11.21	0.0436409		GALC	14q31	0.0390207
ZNF621	3p22.1	0.0346537		NBPF3	1p36.12	0.0436884		PPIL6	6q21	0.0390299
MBD3L2	19p13.2	0.0346866		CCNT1	12q13.11	0.0436988		LINC00092	9q22.32	0.0390967
ZNF491	19p13.2	0.0347155		LOC102724612	8q12.3	0.0437278		KLHL3	5q31	0.0391155
BACH1	21q22.11	0.0347803		TMEM74	8q23.1	0.0437353		C15orf57	15q15.1	0.0392789
HYAL2	3p21.3	0.0348306		COL6A5	3q22.1	0.0437357		RBM33	7q36.3	0.0393225
CYB5D1	17p13.1	0.0348411		ATN1	12p13.31	0.0437416		IL7	8q12-q13	0.0393706
PDE4C	19p13.11	0.0348791		GAA	17q25.2-q25.3	0.0437726		ARL17A	17q21.31	0.0395057
TRIM24	7q32-q34	0.0348798		TRMT2B	Xq22.1	0.0437731		HNF4A-AS1	---	0.0395763
MYO6	6q13	0.0348984		PLEKHA8	7p14.3	0.0437936		ZNF366	5q13.2|5q13.2	0.0395843
HOXA-AS2	7p15.2	0.0349939		LOC284600	1p36.33	0.0438084		RTN4IP1	6q21	0.0395873
HSPH1	13q12.3	0.0350243		NOCT	4q31.1	0.0438293		CTU2	16q24.3	0.0396436
COTL1	16q24.1	0.0350567		ITFG1	16q12.1	0.0438809		KCNH5	14q23.2	0.0396541
PCSK1	5q15-q21	0.0350634		RAB32	6q24.3	0.0439928		SVOPL	7q34	0.0396765
DYNLT1	6q25.2-q25.3	0.0350659		RTP5	2q37.3	0.0439956		LINC00960	3p12.3	0.0396898
MTHFR	1p36.3	0.0350695		API5	11p11.2	0.0440238		AP5M1	14q22.3	0.039698
PTPRM	18p11.2	0.0351698		CGRRF1	14q22.2	0.0440763		MMP19	12q14	0.0397127
CASC11	8q24	0.0352066		RHEB	7q36	0.0443359		SRGAP2B	1p11.2	0.0397894
CHMP2B	3p11.2	0.0352438		KIAA0196	8q24.13	0.0443673		FBF1	17q25.1	0.0398355
HABP2	10q25.3	0.0353156		DEXI	16p13.13	0.0444113		TMEM184A	7p22.3	0.0398646
WEE2-AS1	7q34	0.0353216		CYP2U1	4q25	0.04452		TRIB2	2p24.3	0.0398782
DCN	12q21.33	0.0353235		RNF126	19p13.3	0.0445961		SEMA6A	5q23.1	0.039911
PRAME	22q11.22	0.0353523		SLC11A2	12q13	0.0446123		PGAM1	10q25.3	0.0399158
REL	2p13-p12	0.0353638		ABCB4	7q21.1	0.044659		COG5	7q31	0.0399194
SYNPO	5q33.1	0.035384		SLC9A5	16q22.1	0.0449133		CFD	19p13.3	0.0399433
LOC101927814	16p12.2	0.0354014		LOC101927079	15q11.2	0.0449397		ZNF396	18q12	0.0400045
ST6GAL1	3q27.3	0.0355035		UNC5C	4q21-q23	0.0449409		PGK1	Xq13.3	0.0400234
RARA	17q21	0.0355095		ICA1L	2q33.2	0.0449493		EIF3C	16p11.2	0.0400248
ARPC1B	7q22.1	0.0355447		CCL20	2q36.3	0.0449551		BAIAP3	16p13.3	0.0400958
PCDH1	5q31.3	0.0356053		TBCD	17q25.3	0.0450222		VAPB	20q13.33	0.0401106
CASP1	11q23	0.0356259		LOC286359	9q22.33	0.0450237		AK6	5q13.2	0.0401836
CD99L2	Xq28	0.0356429		FARSA	19p13.2	0.0450461		RSU1	10p13	0.0402259
CLEC7A	12p13.2	0.0357062		TWF2	3p21.1	0.0451663		IGSF10	3q25.1	0.0402368
SFRP4	7p14.1	0.0357564		TAGAP	6q25.3	0.0451669		IL10RA	11q23	0.0402507
PPA2	4q25	0.0359149		LOC101928068	1q44	0.0451866		RASGRP3	2p25.1-p24.1	0.040278
HMGN3-AS1	6q14.1	0.0359899		LIG3	17q11.2-q12	0.0452079		LOC100131496	20q13.12	0.0402887
DNASE1L3	3p14.3	0.0360392		NLGN4X	Xp22.33	0.0452448		TPP1	11p15	0.0403039
ZNF207	17q11.2	0.0360492		TRPM1	15q13.3	0.0452803		GMFG	19q13.2	0.0403524
ALDH1L2	12q23.3	0.0360542		SLC11A1	2q35	0.045331		PLA2G5	1p36-p34	0.0404366
LYPD8	1q44	0.0360698		ATAD2B	2p24.1-p23.3	0.0453699		GLDC	9p22	0.0404383
KIF20B	10q23.31	0.0361133		OR5J2	11q11	0.0453777		ZNF124	1q44	0.0404784
UGCG	9q31	0.0361326		ALDH1A3	15q26.3	0.0453906		SNX21	20q13.12	0.0404981
RXFP1	4q32.1	0.0361349		DDX10	11q22-q23	0.0454271		NBR1	17q21.31	0.0406082
DNAJC5B	8q13.1	0.0362282		ECM2	9q22.3	0.0454374		TP63	3q28	0.040617
LTBP4	19q13.1-q13.2	0.0362623		LIPT1	2q11.2	0.0454844		SPARC	5q31.3-q32	0.0406645
MMP16	8q21.3	0.0362791		SKAP2	7p15.2	0.0455868		GTF2H5	6q25.3	0.040755
CEMIP	15q24	0.0363147		DYRK1B	19q13.2	0.0456367		USP49	6p21	0.0407847
MIR4296	---	0.0364012		ATF6	1q23.3	0.045669		DNAJC11	1p36.31	0.0407849
RTEL1-TNFRSF6B	20q13.33	0.0364262		PROSER2-AS1	10p14	0.0456751		EPHA3	3p11.2	0.0407947
ESPNL	2q37.3	0.0364326		GPR162	12p13	0.0456913		MYLK	3q21	0.0408008
LOC105376896	---	0.0365018		MFNG	22q12	0.0457013		FDX1	11q22	0.0408119
ARHGEF11	1q21	0.0365043		PLXNA4	7q32.3	0.0457052		SF3B1	2q33.1	0.0408184
B3GNT5	3q28	0.0365535		CALCRL	2q32.1	0.0457211		ST20-MTHFS	15q25.1	0.0408287
RNH1	11p15.5	0.0366188		CREBRF	5q35.1	0.0457542		MACROD1	11q11	0.0408677
DPYSL2	8p22-p21	0.0366496		C4orf46	4q32.1	0.0457543		VIM	10p13	0.0409083
ROCK1	18q11.1	0.0366782		HOTTIP	7p15.2	0.0458452		ADAMDEC1	8p21.2	0.040911
HS1BP3	2p24.1	0.0367287		C5orf24	5q31.1	0.0458718		FAM124A	13q14.3	0.0410817
NEB	2q22	0.0367382		GPR37L1	1q32.1	0.0459544		SLC16A5	17q25.1	0.0411503
RNF44	5q35.2	0.0367596		DEPDC1-AS1	---	0.0460008		KCNQ2	20q13.3	0.0411503
FAM120A	9q22.31	0.0367703		NUP93	16q13	0.0460099		SORBS2	4q35.1	0.0411516
AK6	5q13.2	0.0367892		PDYN	20p13	0.0460643		FBXW2	9q34	0.0411617
TCN2	22q12.2	0.0368078		MAGI1	3p14.1	0.046088		MN1	22q12.1	0.0411916
TRAP1	16p13.3	0.036839		CD70	19p13	0.0462069		ACTR1A	10q24.32	0.0412056
TXNL4A	18q23	0.0368802		SEC16B	1q25.2	0.0463221		LOX	5q23.2	0.0412717
LDHA	11p15.4	0.0368904		HK3	5q35.2	0.0463396		TRIM73	7q11.23	0.0412921
FBXO9	6p12.3-p11.2	0.0368925		DTWD1	15q21.2	0.0464958		MFAP3	5q32-q33.2	0.0413063
AVPR1A	12q14.2	0.036983		LINGO3	19p13.3	0.0465492		IFIT5	10q23.31	0.0414904
OSTF1	9q13-q21.2	0.0370502		CD84	1q24	0.0465553		COL9A3	20q13.3	0.0414969
EML3	11q12.3	0.0370904		NDUFA5	7q31.33	0.046569		GNB5	15q21.2	0.0415274
CLDN10-AS1	---	0.0371176		ENSA	1q21.3	0.0465703		NADSYN1	11q13.4	0.0416146
HMCN2	9q34.11	0.0371268		RPL14	12q14.2	0.0465816		TRA2A	7p15.3	0.0416258
FUBP1	1p31.1	0.0371626		PDE4A	19p13.2	0.0466165		NBEAL1	20q13.2	0.0416403
LOC105377200	---	0.0372912		ALOX5	10q11.2	0.0466342		LOC101927604	---	0.0416688
EFCAB6	22q13.2	0.0373205		LOC100271832	2p22.3	0.0466605		RAPGEF4	2q31-q32	0.0416703
PHLDB2	3q13.2	0.0373852		CTBP1	4p16	0.0466628		CLEC7A	12p13.2	0.0416895
TCERG1	5q31	0.0373897		MMP15	16q13	0.0466693		DKK1	10q11.2	0.0416951
C1QB	1p36.12	0.0373907		VTN	17q11	0.0467328		LINC00474	9q31.3	0.0417609
RBMX2	Xq26.1	0.0374432		PRKCH	14q23.1	0.0468322		TK2	16q22-q23.1	0.0418575
MC1R	16q24.3	0.0375345		SACS-AS1	13q12	0.046878		ZDHHC11	5p15.33	0.0419011
PDE4A	19p13.2	0.037598		CMTM7	3p22.3	0.0469406		PSMD13	11p15.5	0.0419169
IL7	8q12-q13	0.0376382		RUFY3	4q13.3	0.0469771		HNRNPK	9q21.32-q21.33	0.0419491
NUB1	7q36	0.0376457		CYP3A5	7q21.1	0.0470283		LOC105376100	---	0.0420913
WT1	11p13	0.0377487		RPL12	9q34	0.0470406		ZNF568	19q13.12	0.0421051
GNAI3	1p13	0.0378288		EREG	4q13.3	0.0471351		NSUN5	7q11.23	0.0421198
PTPRC	1q31-q32	0.0378871		ART1	11p15	0.0471677		PTK6	20q13.3	0.0421207
RASSF1	3p21.3	0.0379999		SLC30A8	8q24.11	0.0471784		GLMP	1q22	0.0421304
GPX3	5q33.1	0.0380216		TPTEP1	22q11.1	0.0472676		LRRC32	11q13.5-q14	0.0422562
ADGRA3	4p15.2	0.0380514		IKZF1	7p12.2	0.047299		HIVEP1	6p24-p22.3	0.042269
DDX18	2q14.1	0.0380781		DTD2	14q12	0.0473946		CD55	1q32	0.0424432
PPP4R1L	20q13.32	0.0380865		PAK4	19q13.2	0.0473999		SLC19A1	21q22.3	0.0425489
KCNMA1-AS1	10q22.3	0.0381009		NIT1	1q21-q22	0.0474456		WDR66	12q24.31	0.0425609
RPL28	19q13.4	0.0381493		LZTS1	8p22	0.0474614		KDELR1	19q13.3	0.042623
RNF14	5q23.3-q31.1	0.0381648		CALY	10q26.3	0.0475703		ZBTB17	1p36.13	0.0427044
SLC29A4	7p22.1	0.0381716		SLC26A1	4p16.3	0.0476515		MPZL3	11q23.3	0.0427405
HK1	10q22	0.0382677		IQGAP3	1q21.3	0.0477889		THRA	17q11.2	0.0427455
F3	1p22-p21	0.0382695		GRIN2A	16p13.2	0.0478464		GGT5	22q11.23	0.0428346
FKBP1A	20p13	0.0383869		UROS	10q25.2-q26.3	0.0478514		NATD1	17p11.2	0.0428781
TOMM70A	3q12.2	0.038415		WBP1L	10q24.32	0.0478924		NCAPD2	12p13.3	0.0428962
FOXF1	16q24	0.0384848		SCOC-AS1	4q31.1	0.0479574		HEXIM1	17q21.31	0.0429211
CDK1	10q21.1	0.0384896		DGCR10	22q11	0.0479826		MT1G	16q13	0.0429676
TRMT2B	Xq22.1	0.0385784		TPPP	5p15.3	0.0479866		MCM3AP-AS1	21q22.3	0.0429699
ERVH-6	Yq11.223	0.0385954		LOC101928708	16q24.2	0.0479888		C11orf88	11q23.1	0.0430558
RAB32	6q24.3	0.0386935		SPTBN1	2p21	0.0480864		NAIF1	9q34.11	0.0430777
FOXN1	17q11.2	0.0387071		ACRV1	11q24.2	0.0482822		HOMER2	15q24.3	0.0430812
PIN4	Xq13	0.0387728		NR1I3	1q23.3	0.0483517		ITGB3	17q21.32	0.0431432
NFYC	1p32	0.0387805		ORC2	2q33	0.0483894		MGST1	12p12.3-p12.1	0.0431864
PPP3CC	8p21.3	0.0388591		KCNH7	2q24.2	0.0484285		STS	Xp22.32	0.0432351
SLFNL1	1p34.2	0.0388627		RPL21	13q12.2	0.048448		CD93	20p11.21	0.043282
GMFG	19q13.2	0.0389161		NOS1	12q24.22	0.0484762		PTPN21	14q31.3	0.0434478
RBPMS	8p12	0.0389306		SAP30	4q34.1	0.0484848		MT1H	16q13	0.043466
RNF41	12q13.13	0.0389734		ATP6V1B1	2p13.1	0.0485285		MT1X	16q13	0.0435303
RFC3	13q13.2	0.0389868		ZNF57	19p13.3	0.0485295		KNTC1	12q24.31	0.0435437
FLOT2	17q11.2	0.039013		WNT9B	17q21.32	0.0485903		MOG	6p22.1	0.0438196
BTNL9	5q35.3	0.0390244		CDC42BPA	1q42.11	0.048591		TGFBI	5q31	0.0438291
FBXO42	1p36.23-p36.11	0.0390381		DCTN6	8p12	0.0487242		ZNF252P	8q24.3	0.043834
FANCM	14q21.2	0.0390456		FNDC3A	13q14.2	0.0487269		RELL1	4p14	0.0438599
TRMT1	19p13.2	0.0391397		DNM2	19p13.2	0.0487351		LOC105377832	---	0.0440132
COL7A1	3p21.1	0.0391719		CEP290	12q21.32	0.0487823		HIC2	22q11.21	0.0440348
SLC39A13	11p11.2	0.0392158		INMT-FAM188B	7p14.3	0.0489853		ERICH1-AS1	8p23.3	0.0440887
BECN1	17q21	0.0392372		TMEM239	20p13	0.0490875		CCL15-CCL14	17q12	0.0440903
VPS33A	12q24.31	0.0392502		LINC01120	2q21.1	0.049191		PFKL	21q22.3	0.0441256
GATM	15q21.1	0.0392749		HECTD1	14q12	0.0492045		HBD	11p15.5	0.0442175
AKAP7	6q23	0.039349		SRSF5	14q24	0.0492811		KANK1	9p24.3	0.0442832
EFNB1	Xq12	0.0394592		ACTR1B	2q11.2	0.0492983		PGM5	9q13	0.0443498
CANT1	17q25.3	0.0394866		UBE2I	16p13.3	0.0493167		BANK1	4q24	0.0443551
CCDC13	3p22.1	0.0395049		TSPAN9	12p13.33-p13.32	0.0493284		ADORA1	1q32.1	0.0444325
CHAF1B	21q22.13	0.0395442		PSMD3	17q21.1	0.0494252		JADE3	Xp11.23	0.044499
TIMM8A	Xq22.1	0.0395483		EIF1AX	Xp22.12	0.0494287		EFCAB6	22q13.2	0.0445056
OSGIN2	8q21	0.0395655		SMIM7	19p13.11	0.0494384		PCF11	11q13	0.0445275
RAI14	5p13.3-p13.2	0.0395694		GCLC	6p12	0.0494471		PPP3CC	8p21.3	0.0445668
UNC5C	4q21-q23	0.0395971		PTGDR2	11q12-q13.3	0.0494937		PTHLH	12p12.1-p11.2	0.0445904
PPIH	1p34.1	0.0395994		GPX2	14q24.1	0.0494967		URB2	1q42.13	0.0446601
DAZAP2	12q12	0.0396276		LSM5	7p14.3	0.0495254		YME1L1	10p14	0.0446738
SNX18	5q11.2	0.0396301		HIST1H4C	6p22.1	0.0495369		CCDC144B	17p11.2	0.0447318
PLIN5	19p13.3	0.0396303		GTF3C1	16p12	0.049548		CSPP1	8q13.2	0.0447576
VSIG10	12q24.23	0.0396414		PGK1	Xq13.3	0.0495552		HSPA13	21q11	0.0448047
SFXN3	10q24.31	0.0396568		CNTNAP5	2q14.3	0.0496632		FAM3C	7q31	0.0448107
PRR14L	22q12.2	0.0396597		GAB1	4q31.21	0.0497471		RIOK3	18q11.2	0.0448664
CD58	1p13	0.0398175		LHX9	1q31.1	0.0497705		MYRF	11q12-q13.1	0.044954
NR1D1	17q11.2	0.0398458		APOL6	22q12.3	0.0498463		FUS	16p11.2	0.0450051
TAF2	8q24.12	0.0398507		ELMOD2	4q31.1	0.0498561		SRGN	10q22.1	0.0450181
SH3GL1	19p13.3	0.0399097		LAMA3	18q11.2	0.0499621		SLC26A7	8q23	0.045065
WAS	Xp11.4-p11.21	0.0399778		BEND5	1p33	0.0499742		LOC284379	19q13.42	0.0450873
ACTR1B	2q11.2	0.0400212		PSME3	17q21	0.049992		IL4R	16p12.1-p11.2	0.0450952
LINC00307	21q22.11	0.0400633		SYT1	12cen-q21	0.0499958		TSTA3	8q24.3	0.0451284
A2ML1	12p13.31	0.0401111						CHIC1	Xq13.2	0.0451548
MEP1A	6p12-p11	0.040176						MAGI1	3p14.1	0.0451682
ZSCAN20	1p34.3	0.0402015						LOC283352	12q24.33	0.045171
MLLT6	17q21	0.040278						ZNF160	19q13.42	0.0452428
CACNB1	17q21-q22	0.040351						H2AFY	5q31.1	0.0452879
KYNU	2q22.2	0.0403955						TMEM44	3q29	0.0453119
MEIOC	17q21.31	0.0404						PDXK	21q22.3	0.0453312
MEOX1	17q21	0.0404404						POLR1E	9p13.2	0.0453722
GAS1	9q21.3-q22	0.0404768						TAF5L	1q42.13	0.0454063
LOC100421171	---	0.0404821						B4GALNT3	12p13.33	0.04544
AGTRAP	1p36.22	0.0404823						HLA-DMB	6p21.3	0.0455654
HDGFRP3	15q25.2	0.0405757						MMP2	16q12.2	0.0455904
SYT9	11p15.4	0.0405833						CMPK1	1p32	0.0456065
SYNRG	17q12	0.0406127						MINA	3q11.2	0.0456469
ADAMTS17	15q24	0.0406403						KLF12	13q22	0.0456469
GOSR1	17q11	0.0406921						2018-09-10	2q13	0.045648
SSRP1	11q12	0.0407055						TSPAN8	12q14.1-q21.1	0.0456649
RB1CC1	8q11	0.0407836						COPA	1q23.2	0.0456788
FLJ40288	7q32.3	0.040796						LOC101928865	11q14.1	0.0457276
LOC101927051	22q13.1	0.0408254						BMX	Xp22.2	0.0457459
PDE4DIP	1q12	0.0408397						CASP8	2q33-q34	0.0457491
BICD2	9q22.31	0.0408482						TM2D1	1p31.3	0.0459303
DEDD	1q23.3	0.0409652						LINC00910	17q21.31	0.0460481
LIF	22q12.2	0.0409867						SEC63	6q21	0.0460698
SLC39A5	12q13.3	0.0409964						LOC101927851	1q42.3	0.0462065
MGAT3	22q13.1	0.0409987						ASPH	8q12.1	0.0462492
ZGRF1	4q25	0.0410274						PCBD1	10q22	0.0462571
LY86	6p25.1	0.0410288						USP25	21q11.2	0.04627
LOC105375650	---	0.0410822						BAGE	21p11.1	0.0463995
CA6	1p36.2	0.0410998						ITGA4	2q31.3	0.0464471
LINC00535	8q22.1	0.0411358						IL1R1	2q12	0.0465115
FCRL5	1q21	0.0411591						EIF3F	11p15.4	0.0465334
LMO2	11p13	0.0411669						TRIOBP	22q13.1	0.0465339
PER1	17p13.1	0.0413941						SHC3	9q22.1	0.046548
SLC16A3	17q25	0.0413964						AMER1	Xq11.2	0.0466093
LRCH3	3q29	0.041487						ARHGAP35	19q13.3	0.0466528
EPG5	18q12.3	0.0414884						IGFBP6	12q13	0.0467323
CALM1	14q32.11	0.0415074						OPRD1	1p36.1-p34.3	0.0468359
FAM111B	11q12.1	0.0415533						PSMC3IP	17q21.2	0.0468894
STAU2-AS1	8q21.11	0.0416219						TMEM126B	11q14.1	0.0469502
CTNNA3	10q22.2	0.0416249						OVOL1	11q13	0.0469903
LZTS1	8p22	0.0416546						CD44	11p13	0.0470371
WFIKKN1	16p13.3	0.041769						RGS10	10q25	0.0471009
ERICH1	8p23.3	0.0417868						LOC105379752	---	0.0471221
EFCAB13	17q21.32	0.0418046						SAMD12	8q24.12	0.0472424
ARHGDIB	12p12.3	0.0418122						DDR1	6p21.3	0.0472758
IL1RAP	3q28	0.0418267						RELN	7q22	0.0473125
LILRB4	19q13.4	0.0419039						CEP112	17q24.1	0.0473547
C10orf90	10q26.2	0.04201						BMP1	8p21.3	0.0473951
SRPX2	Xq22.1	0.0420255						NEDD9	6p24.2	0.0474301
LINC00330	13q14.11	0.0420585						SCAF11	12q12	0.0474796
KCNG3	2p21	0.0421094						IGFBP7	4q12	0.0475125
PRKAR2A	3p21.3-p21.2	0.0421173						DCAF11	14q11.2	0.047529
DDB2	11p11.2	0.0421408						PAQR3	4q21.21	0.0475843
GUSB	7q21.11	0.0422587						FYB	5p13.1	0.0476347
RASL10A	22q12.2	0.0423138						ITFG1	16q12.1	0.0476973
SNX3	6q21	0.0423459						LOC101927018	17q11.2	0.0477082
FILIP1L	3q12.1	0.0423521						RBM14	11q13.2	0.0477103
IL31RA	5q11.2	0.0423656						NR4A2	2q22-q23	0.0477383
TIMD4	5q33.3	0.042403						PSIP1	9p22.3	0.0478366
ADA	20q13.12	0.0424165						OR51B5	11p15.4	0.0478592
RUNX1T1	8q22	0.0424577						SH3PXD2B	5q35.1	0.0478853
TMEM235	17q25.3	0.0424735						FRAS1	4q21.21	0.0479104
LOC340581	Xq26.3	0.0424789						NDUFS8	11q13	0.0479938
ANKH	5p15.1	0.0426821						MAP3K12	12q13	0.0480055
ISG20	15q26	0.0427145						PRKG1-AS1	---	0.0480549
GEMIN4	17p13	0.0427678						JUNB	19p13.2	0.0480758
ITGB2	21q22.3	0.0427701						NFIA	1p31.3-p31.2	0.0481119
PROCR	20q11.2	0.0428122						ADIPOR2	12p13.31	0.0481859
C8orf59	8q21.2	0.0428273						NOL4L	20q11.21	0.0482183
NDUFS5	1p34.2-p33	0.0428288						SLC23A3	2q35	0.0482356
COBL	7p12.1	0.0428879						PTPN1	20q13.1-q13.2	0.0482508
TMEM151B	6p21.1	0.0429311						GALNS	16q24.3	0.0484177
DCAF4L2	8q21.3	0.0429825						GPSM2	1p13.3	0.0485165
ROCK2	2p24	0.0430079						DDX50	10q22.1	0.048575
MTSS1	8p22	0.0430311						UNG	12q23-q24.1	0.0486015
UQCRC2	16p12	0.0430467						CSMD2	1p34.3	0.0486036
MGST3	1q23	0.0430788						TBX2-AS1	17q23.2	0.0486195
KIF9-AS1	3p21.31	0.0430972						FCGR2A	1q23	0.0487056
ACTG1	17q25	0.043114						BBS9	7p14	0.048718
ZNF826P	19p12	0.0431332						PDCL	9q12-q13	0.0487654
FOXO1	13q14.1	0.0431579						LOC101928314	4q34.1	0.0487811
FLT1	13q12	0.0431856						FCGR3B	1q23	0.0488208
SEMA3A	7p12.1	0.0432482						MAP3K14	17q21	0.0488213
ST8SIA4	5q21	0.0432647						FAM43A	3q29	0.049009
LOC101928813	---	0.0432955						TOR1AIP2	1q25.2	0.0490961
CASC2	10q26.11	0.0433103						ABCB4	7q21.1	0.0493413
KIAA1671	22q11.23	0.0433552						GAB1	4q31.21	0.0493475
SIRPA	20p13	0.0433559						SOCS2	12q	0.0493946
LINC01514	10q24.31	0.0434087						DNASE1L3	3p14.3	0.0494046
ATP2A1	16p12.1	0.0434296						POLR2J3	7q22.1	0.0494369
NMU	4q12	0.0434574						ESPL1	12q	0.049495
ZSCAN30	18q12.2	0.043536						MIA	19q13.2	0.0495376
SCN3B	11q23.3	0.0435851						CCNE2	8q22.1	0.0495486
LOC105376100	---	0.0436038						ACVR1C	2q24.1	0.049552
LILRA3	19q13.4	0.0436334						LOC105371708	---	0.049568
BPI	20q11.23	0.0436629						LOC100506127	11q13.5	0.0495693
RBMY3AP	Yp11.2	0.0437856						CHAF1B	21q22.13	0.0495845
LINC00308	21q21.1	0.0440272						LINC01128	1p36.33	0.0496479
LOC100130268	12q21.1	0.0440493						WNK1	12p13.3	0.0496539
CD86	3q21	0.0440882						CNPY3	6p21.1	0.0496699
MRC1	10p12.33	0.0442051						MSRB3	12q14.3	0.0496755
DMWD	19q13.3	0.0443116						ACPP	3q22.1	0.0496892
DCAF13	8q22.3	0.044333						CDK12	17q12	0.0497013
CHST15	10q26	0.0444489						RECQL5	17q25	0.0498105
SLC6A11	3p25.3	0.0445686						PIK3C2A	11p15.5-p14	0.0498151
ARFGAP3	22q13.2	0.0445753						ADGRL1	19p13.2	0.0498182
COL6A3	2q37	0.0446576						C4orf33	4q28.2	0.0499166
MCM3AP-AS1	21q22.3	0.0447564						LMF1	16p13.3	0.0499284
FAM127A	Xq26	0.0447762						MRE11A	11q21	0.0499608
SLC17A1	6p22.2	0.044817						LOC101927495	---	0.0499895
WTAP	6q25-q27	0.0448344
FEZ1	11q24.2	0.0448883
CDS1	4q21.23	0.0449053
APAF1	12q23	0.0449181
APBA3	19p13.3	0.0449269
MVB12B	9q33.3	0.045123
IGSF3	1p13	0.0451318
NRL	14q11.1-q11.2	0.0451421
MUC4	3q29	0.0451834
ZMYM6	1p34.2	0.0451881
BTBD19	1p34.1	0.0453399
ACTB	7p22	0.045371
IL3RA	Xp22.3 or Yp11.3	0.0453714
ARHGEF28	5q13.2	0.0453793
TCEB3	1p36.1	0.0454002
PHTF1	1p13	0.0454287
RIMS3	1p34.2	0.0454439
BCL2L14	12p13-p12	0.0454904
MAP3K13	3q27	0.0454929
CDKN1A	6p21.2	0.0455042
NRGN	11q24	0.0455536
CEP290	12q21.32	0.0456218
MRGPRX3	11p15.1	0.0456656
SRSF7	2p22.1	0.0456969
RPS9	19q13.4	0.045707
XYLB	3p22-p21.3	0.0457163
LEP	7q31.3	0.045746
LSM5	7p14.3	0.0457595
KCNQ1OT1	11p15	0.0458008
APBB1IP	10p12.1	0.0458493
SCG5	15q13-q14	0.0458548
SLC9B2	4q24	0.0458714
PFKFB4	3p22-p21	0.0460602
RNF207	1p36.31	0.0460899
FAM151A	---	0.0460999
SDCBPP2	8q13.3	0.0462569
CHDH	3p21.1	0.0463248
CPA6	8q13.2	0.0463383
PALM2	9q31.3	0.0463449
PRKCD	3p21.31	0.0463634
CECR9	---	0.0464262
LINC00463	13q12.13	0.0464475
ZNF638	2p13.1	0.0464592
CEP112	17q24.1	0.0464704
EIF3C	16p11.2	0.046485
PAQR3	4q21.21	0.0464892
HSF2BP	21q22.3	0.0465255
ZNF479	7p11.2	0.0465327
S100A8	1q21	0.0466561
DTYMK	2q37.3	0.0467719
ZNF846	19p13.2	0.0468883
GLO1	6p21.3-p21.1	0.0469507
LOC101927735	---	0.046951
LAMC1	1q31	0.0469788
PPIL2	22q11.21	0.0469903
POP5	12q24.31	0.0470478
PLIN3	19p13.3	0.0470809
APLF	2p13.3	0.0471249
ARL17A	17q21.31	0.0471434
RSRC2	12q24.31	0.0471758
ANXA6	5q33.1	0.0472108
TMEM67	8q22.1	0.0472824
H3F3A	1q42.12	0.0475168
LOC105370687	---	0.0476704
TGFA	2p13	0.0476746
LSAMP	3q13.31	0.0477609
HNRNPLL	2p22.1	0.0478914
NFIL3	9q22	0.0478987
LOC101927948	2p12	0.0480219
UBE2D3	4q24	0.0480692
TSPAN9	12p13.33-p13.32	0.048072
CASKIN1	16p13.3	0.0480896
USP8	15q21.2	0.0480906
INTS6	13q14.3	0.0481076
PGGT1B	5q22.3	0.048194
CTSK	1q21	0.0482115
ELK1	Xp11.2	0.0482285
LOC285889	7q36.3	0.0482617
NKTR	3p22.1	0.0482694
MAK	6p24	0.0483529
CDK9	9q34.1	0.0484121
ME1	6q12	0.0484416
CSPG4P5	15q25.2	0.0484631
ANXA1	9q21.13	0.048534
NRP2	2q33.3	0.0485905
CSHL1	17q24.2	0.0485961
TACSTD2	1p32	0.0486267
RPL14	12q14.2	0.0486527
TNFAIP3	6q23	0.0487349
CRKL	22q11.21	0.0488714
EMID1	22q12.2	0.0489142
SLC30A5	5q12.1	0.0489458
CYP19A1	15q21.1	0.0489818
PSMD7	16q22.3	0.0489861
LOC646522	11q25	0.0489974
ERN1	17q24.2	0.0490161
ALKBH5	17p11.2|17p11.2	0.0490234
BRE-AS1	2p23	0.0490845
TCTE3	6q27	0.0491838
ZNF496	1q44	0.0491961
HIPK1	1p13.2	0.0492422
SDS	12q24.13	0.0494488
GPR183	13q32.3	0.0495206
DCX	Xq22.3-q23	0.0495384
PRSS33	16p13.3	0.049584
SYNGR2	17q25.3	0.0495862
LOC101928389	---	0.0496354
SCARA5	8p21.1	0.0496425
LOC100132077	9q22.32	0.0496462
MTBP	8q24.12	0.0497014
EPM2A	6q24	0.0497946
RSU1P2	10q11.21	0.0498695
ATP11A-AS1	13q34	0.0498717
DPEP1	16q24.3	0.0499213
EXOSC6	16q22.1	0.0499461
DFNA5	7p15	0.0499585
RAD21	8q24	0.0499799
LOC105373065	---	0.0499956
