# Supplementary material for: Whole Genome Transcriptome Analysis of the Association between Obesity and Triple Negative Breast Cancer in Caucasian Women
Source: Preprints.org preprint supplement (doi:10.20944/preprints201803.0174.v1), 2018-03-20
Supplement: Supplementary file 5 [file Table SA.xlsx]

## Sheet: Sheet1
Table SA.	List of significantly differentially expressed genes showing evidence of association with TNBC at P<0.05 among the three patient groups in women with premenopausal status.
Gene Symbol	Cytoband	unadj.p
CD84	1q24	0.0001276
DUXAP8	14q11.2	0.0001495
NPC2	14q24.3	0.0001957
MAGEA10-MAGEA5	Xq28	0.0002825
PAWR	12q21	0.0002988
SNX29	16p13.13-p13.12	0.0003007
IFNGR1	6q23.3	0.000302
PRKXP1	15q26.3	0.00034
WIPF1	2q31.1	0.0003444
ABCG1	21q22.3	0.000437
DPY19L1	7p14.2	0.0004943
MGAT4A	2q12	0.0004978
KYNU	2q22.2	0.0005584
RNASET2	6q27	0.0005959
COX10-AS1	---	0.0006016
GPRIN3	4q22.1	0.000611
MMD2	10p	0.0006197
TMED10	14q24.3	0.0006904
FLVCR2	14q24.3	0.0007485
GABBR1	6p21.31	0.0007696
RPL32P3	3q21.3	0.0008071
RAPGEF1	9q34.3	0.0008108
LYST	1q42.1-q42.2	0.0009433
ATXN1	6p23	0.0010134
FBXO28	1q42.11	0.0010335
N4BP2L2	13q13.1	0.0010974
ZC3H12D	6q25.1	0.00111
IL13RA1	Xq24	0.0011401
SEL1L	14q31	0.001188
BTK	Xq21.33-q22	0.0012081
NAGA	22q11	0.0012351
BLVRA	7p13	0.0013077
MIR137HG	1p21.3	0.0013078
ASAH1	8p22	0.0013094
MICA	6p21.3	0.0013458
PRKCH	14q23.1	0.0014473
CSGALNACT1	8p21.3	0.0014498
WAPL	10q23.2	0.0015497
TPT1-AS1	13q14.13	0.0015831
NAIP	5q13.2	0.0016107
KMO	1q42-q44	0.0016617
CTSK	1q21	0.0016747
GLCCI1	7p21.3	0.0016844
FBXO10	9p13.2	0.0017937
ITFG1	16q12.1	0.0018311
CARD14	17q25	0.0019603
ZNF507	19q13.11	0.0020219
VPS11	11q23	0.0020332
DIO2	14q24.2-q24.3	0.0020506
POLR1E	9p13.2	0.0020525
TOP1MT	8q24.3	0.002114
CLN5	13q21.1-q32	0.0021464
DAB2	5p13.1	0.0022004
LAYN	11q23.1	0.0022578
EDEM1	3p26.1	0.0023114
SLA	8q24	0.0023648
RABEP1	17p13.2	0.0025026
ICAM3	19p13.3-p13.2	0.0025662
MTERF4	2q37.3	0.0026185
ZNF621	3p22.1	0.0027221
FOXN3	14q31.3	0.0027324
ATP6V1B2	8p21.3	0.0027565
SAR1B	5q31.1	0.0028085
SLC31A2	9q32	0.0028311
TPST2	22q12.1	0.0028539
TMBIM4	12q14.3	0.0028541
NSF	17q21	0.0029619
TMEM147-AS1	---	0.0029717
DNAJC3	13q32.1	0.0029811
TP53I11	11p11.2	0.0030056
HSPH1	13q12.3	0.0030731
CREBL2	12p13	0.0031426
PTEN	10q23.3	0.0031571
EPB41L4A	5q21.3	0.0031959
E2F1	20q11.2	0.0032137
PTPN22	1p13.2	0.0032218
CCDC150	2q33.1	0.0032538
PTGS1	9q32-q33.3	0.0034066
GALNT1	18q12.1	0.0034169
CASC10	10p12.31	0.0034551
CCDC34	11p14.1	0.0034583
ARSD	Xp22.3	0.003467
PTPRF	1p34	0.0034935
DPYD	1p22	0.0035813
TRIP12	2q36.3	0.0036024
TMEM59	1p32.3	0.0036271
FCHO2	5q13.2	0.0036395
STX8	17p12	0.0036457
ZNF410	14q24.3	0.0036723
NDRG2	14q11.2	0.0037255
NUP62	19q13.33	0.0037842
SSH1	12q24.11	0.0038285
IFNAR1	21q22.11	0.0038305
STC2	5q35.1	0.0038556
ALG5	13q13.3	0.0039053
XBP1	22q12.1|22q12	0.0039054
ZNF585A	19q13.12	0.0039437
ZMYM2	13q11-q12	0.0039597
IL6ST	5q11.2	0.0039927
SET	9q34	0.0040577
IL4R	16p12.1-p11.2	0.0040966
SFT2D1	6q27	0.0041268
CELF1	11p11	0.0041286
NBN	8q21	0.0041876
MLF1	3q25.1	0.0041993
HAVCR2	5q33.3	0.0043052
ZC3H7B	22q13.2	0.0043155
MYL6B	12q13.13	0.0043598
TRDN	6q22.31	0.0043599
FCGR3A	1q23	0.004413
RPS6KB1	17q23.1	0.0044217
C15orf57	15q15.1	0.0044389
SPTLC2	14q24.3	0.0045426
KIF23	15q23	0.0045464
SLC25A36	3q23	0.0045672
EFNB3	17p13.1	0.0045768
LYPD8	1q44	0.0046399
RPS21	20q13.3	0.0047476
MGAT2	14q21	0.0047537
NOS1	12q24.22	0.0048442
NNMT	11q23.1	0.004884
SUSD6	14q24.1	0.0048977
CTAGE5	14q13.3	0.0048994
SLCO2B1	11q13	0.0049196
FGFR2	10q26	0.0049326
EHD4	15q11.1	0.0049432
SLF2	10q24.31	0.004956
HCN4	15q24.1	0.0051518
SFXN3	10q24.31	0.0053232
SYTL3	6q25.3	0.0053717
CASP9	1p36.21	0.0054573
SPEN	1p36	0.005478
FBXL18	7p22.2	0.0055749
DNAJB9	7q31|14q24.2-q24.3	0.0056559
RAD51B	14q23-q24.2	0.0057047
SHANK2	11q13.2	0.0058065
SLC7A7	14q11.2	0.0058417
CIB2	15q24	0.0058838
FNDC3A	13q14.2	0.0058937
NDUFAF1	15q11.2-q21.3	0.0059045
IDS	Xq28	0.0059393
SCML4	6q21	0.0059617
SMC2	9q31.1	0.0060641
EIF3B	7p22.3	0.0061082
LOC105378382	---	0.0061446
MNAT1	14q23	0.0061446
SEC62	3q26.2	0.0061913
KDM3B	5q31	0.0062079
HIF1A	14q23.2	0.0062097
LINC01492	9q31.1	0.006289
GRN	17q21.32	0.0062964
EBAG9	8q23	0.0063212
ZBTB5	9p13.2	0.0064121
PUM3	9p24.2	0.0064194
MAP3K3	17q23.3	0.0064649
SYN2	3p25	0.006599
PLCG1-AS1	---	0.0066608
INPP5E	9q34.3	0.0067072
ATXN2	12q24.1	0.0068248
ST3GAL3	1p34.1	0.0069014
NDUFAF6	8q22.1	0.0069277
TFEC	7q31.2	0.0069416
PTCHD1	Xp22.11	0.0069487
AXL	19q13.1	0.0070202
BEND7	10p13	0.0071231
CLCN4	Xp22.3	0.0071452
GLRX	5q14	0.0071913
HS6ST3	13q32.1	0.0072703
GLUD1	10q23.3	0.0072809
SF3B1	2q33.1	0.0073699
ATP8A1	4p13	0.007397
EVI2A	17q11.2	0.0074085
2018-03-09	12q14.1	0.0075334
ULK2	17p11.2	0.0075951
MPP1	Xq28	0.0076413
BTG1	12q22	0.0076479
FABP6	5q33.3-q34	0.0076954
TBX19	1q24.2	0.00774
ABCA1	9q31.1	0.0077467
ACP5	19p13.2	0.0077712
SIRPA	20p13	0.007949
GPR180	13q32.1	0.007987
BTD	3p25	0.0080068
HMGA2	12q15	0.0080728
HOPX	4q12	0.0081509
PPM1A	14q23.1	0.0082111
TNFRSF11A	18q22.1	0.0082491
E2F3	6p22	0.0082769
LINC00330	13q14.11	0.0083896
MCM3AP-AS1	21q22.3	0.0084401
PTPRO	12p13.3-p13.2|12p13-p12	0.0085224
ITGB2	21q22.3	0.0085455
CR1	1q32	0.0085477
VTI1A	10q25.2	0.0085519
PCMT1	6q25.1	0.0085617
PBX3	9q33.3	0.0085693
MAST4	5q12.3	0.0086208
PPP3R1	2p15	0.0086882
RBM15	1p13	0.0088175
SAMSN1	21q11	0.0088427
NCOA3	20q12	0.0088513
NCOA6	20q11	0.0088783
ERN1	17q24.2	0.0089411
LOC101928303	---	0.0089437
ZC3H14	14q31.3	0.0089913
ANKH	5p15.1	0.0090188
CYBB	Xp21.1	0.0090529
USP9Y	Yq11.2	0.0090671
TLR2	4q32	0.0090986
CEP350	1q25.2	0.0091109
PAPPA	9q33.2	0.0091333
PLXNC1	12q23.3	0.0091415
COL3A1	2q31	0.009185
SIGLEC11	19q13.33	0.0091958
LOC100421171	---	0.0092119
APBB1IP	10p12.1	0.0092629
GAP43	3q13.31	0.0092663
SLC7A1	13q12.3	0.0093614
PTPRC	1q31-q32	0.0094138
MARCKS	6q22.2	0.0094166
MATN2	8q22	0.009491
MTSS1L	16q22.1	0.0094945
HLA-DMB	6p21.3	0.0094956
CD53	1p13	0.0094988
RPS6KA2	6q27	0.0094993
ADORA3	1p13.2	0.009559
ITGAX	16p11.2	0.009574
ATP6V0E1	5q35.1	0.0096185
INPP5D	2q37.1	0.0096262
DBN1	5q35.3	0.0096273
PCYT1B	Xp22.11	0.0096306
FKBP15	9q32	0.0096562
BANK1	4q24	0.0096862
LOC100507053	4q23	0.0097374
CALCOCO2	17q21.32	0.009743
SH3YL1	2p25.3	0.00975
SLC2A11	22q11.23	0.0097721
SLC25A27	6p12.3	0.0097812
CXCR6	3p21	0.0098435
DISC1	1q42.1	0.0098516
FAS	10q24.1	0.0099071
ALOX5	10q11.2	0.009921
LOC646762	7p14.3	0.0101213
PPP1R2	3q29	0.0102008
CDC42SE2	5q31.1	0.0102558
CD58	1p13	0.0102759
HERPUD1	16q13	0.0103082
GLIPR1	12q21.2	0.0103371
XK	Xp21.1	0.0103822
DCN	12q21.33	0.0104083
LOC105370978	---	0.0104816
LASP1	17q11-q21.3	0.0105046
MAP3K2	2q14.3	0.0105329
DOCK4	7q31.1	0.0105981
CDYL2	16q23.2	0.0106663
UQCRB	8q22	0.0106863
RASSF5	1q32.1	0.0108211
HIP1	7q11.23	0.0108495
CLEC12A	12p13.2	0.0108686
POSTN	13q13.3	0.0109906
GALC	14q31	0.0109975
TRIM23	5q12.3	0.011015
ZNF260	19q13.12	0.0110303
TRIM2	4q31.3	0.0110316
RBFOX1	16p13.3	0.0111334
FUCA1	1p34	0.0112387
ADAM28	8p21.2	0.0112593
ALKBH1	14q24.3	0.0112775
SGK1	6q23	0.0113659
CTU2	16q24.3	0.0113667
CCDC86	11q12.2	0.0116678
KLHL6	3q27.3	0.0116824
LAPTM5	1p34	0.0117169
TSPAN31	12q13.3	0.0117721
EFS	14q11.2	0.0118129
USP36	17q25.3	0.0118582
MBNL2	13q32.1	0.0118701
LOC101928909	---	0.0118883
MAP3K5	6q22.33	0.0119139
HFE	6p21.3	0.0119632
PHKB	16q12-q13	0.0120516
PSMD4	1q21.3	0.0120971
BASP1	5p15.1	0.0120978
LOC643711	12q23.1	0.0121321
FECH	18q21.3	0.0121346
TRRAP	7q21.2-q22.1	0.0121939
C6orf89	6p21.2	0.012217
CHST1	11p11.2	0.0122895
PTPRN2	7q36	0.0123385
LRRFIP1	2q37.3	0.0123763
AGA	4q34.3	0.0123998
GTF2H5	6q25.3	0.012446
RPS29	14q	0.0124743
DOCK2	5q35.1	0.0126394
ITPR1	3p26.1	0.0126465
ITGA4	2q31.3	0.0126641
ANKRD20A5P	18p11.21	0.0127145
TERF2IP	16q23.1	0.0128764
FCGR3B	1q23	0.012879
LCP2	5q35.1	0.012942
SDS	12q24.13	0.012974
UBL3	13q12-q13	0.0130803
LOC645513	4q26	0.0131163
HDAC2	6q21	0.0131365
IGSF6	16p12.2	0.01318
SERPIND1	22q11.21	0.0132745
ETV4	17q21.31	0.0132791
JAK1	1p32.3-p31.3	0.0133471
KLRC4-KLRK1	12p	0.0133786
HLA-DPB1	6p21.3	0.0134795
GIT2	12q24.1	0.0135141
RGL3	19p13.2	0.0135199
ARHGAP32	11q24.3	0.0135364
NAGLU	17q21	0.0135482
LYRM1	16p11.2	0.0135564
ATG7	3p25.3	0.0136649
LIPA	10q23.2-q23.3	0.013681
IRF8	16q24.1	0.0136979
SPOP	17q21.33	0.0137067
NIPA1	15q11.2	0.0137333
ZNF783	7q36.1	0.0137777
ELOVL5	6p12.1	0.0138047
ABCC4	13q32	0.0138635
LY86	6p25.1	0.0138646
IKZF2	2q34	0.0138926
ITGB3	17q21.32	0.013899
RNASE4	14q11	0.0139879
LINC01134	1p36.32	0.0139921
2018-09-08	5q31	0.0141152
MGEA5	10q24.1-q24.3	0.0141294
ARHGEF12	11q23.3	0.0141677
FAM69A	1p22.1	0.0143115
ARPP21	3p22.3	0.0143142
DKC1	Xq28	0.0143214
MPV17	2p23.3	0.0143381
SRSF7	2p22.1	0.0143559
KDM4A	1p34.1	0.0147659
ZNF239	10q11.22-q11.23	0.0147736
ELAVL1	19p13.2	0.01482
LEKR1	3q25.31	0.0149201
SOX13	1q32	0.0149619
FFAR1	19q13.1	0.0150281
SEC16B	1q25.2	0.0151036
GJD3	17q21.2	0.0152456
HERC3	4q21	0.0152894
MYO5A	15q21	0.0154094
ZNF286A	17p11.2	0.015481
SH2B3	12q24	0.0154959
CTTN	11q13	0.0155157
KIAA0513	16q24.1	0.0155266
GCAT	22q13.1	0.0155343
HELQ	4q21.23	0.0155637
NBR1	17q21.31	0.0157385
LINC00662	19q11	0.0157389
SMPDL3A	6q22.31	0.0158503
LOC102724612	8q12.3	0.0159248
ALOX5AP	13q12	0.0159971
CLTC	17q23.1	0.0160539
APOB	2p24-p23	0.0160732
CCR2	3p21.31	0.0162578
CLLU1	12q22	0.0162784
MID1	Xp22	0.0162964
SOX4	6p22.3	0.0163916
SYNCRIP	6q14-q15	0.0164566
ASXL2	2p24.1	0.0164572
IKZF1	7p12.2	0.0164626
PRKCA	17q22-q23.2	0.0164718
GPSM2	1p13.3	0.0165812
SNCA	4q21	0.0166216
LOC101929964	---	0.0166238
OSGIN2	8q21	0.0166571
LOC643201	5q35.2	0.016704
RB1	13q14.2	0.0167706
LINC01588	14q21.3	0.0167723
SLC22A7	6p21.1	0.0168704
FCRL5	1q21	0.0169238
LOC105371232	---	0.0169301
PCSK6	15q26.3	0.0169954
ZNF430	19p12	0.0170179
DICER1-AS1	14q32.13	0.0170376
ERAP1	5q15	0.0171402
GPR137B	1q42-q43	0.0171664
LOC283435	12q24.32	0.0171908
DNAL4	22q13.1	0.0172547
RAB3IP	12q15	0.0173
PTPRD	9p23-p24.3	0.0173278
GCC2	2q12.3	0.0173315
SH2D3C	9q34.11	0.0173374
C8orf31	8q24.3	0.0173454
LEPROT	1p31.3	0.0173723
MED13	17q22-q23	0.0174473
TOE1	1p33	0.0174531
RARG	12q13	0.0174585
EMP3	19q13.3	0.017492
FLI1	11q24.1-q24.3	0.0175197
RAB30	11q14.1	0.0176696
CSF1R	5q32	0.0177012
DHX34	19q13.3	0.017736
IRF5	7q32	0.0178207
PSAP	10q21-q22	0.0178641
PIK3CG	7q22.3	0.0178897
LOC727916	6q12	0.018027
INHBA	7p15-p13	0.0180501
WISP1	8q24.22	0.0180534
ATG2B	14q32.2	0.0180621
INPP4A	2q11.2	0.0181246
ESPL1	12q	0.0181298
TIGD4	4q31.3	0.0181707
RIMS2	8q22.3	0.0182839
LRRC3C	17q21.1	0.018286
TBC1D12	10q23.33	0.018298
MGC40069	14q11.2	0.0183498
MED25	19q13.3	0.0184064
GRIA3	Xq25	0.0184446
HCLS1	3q13	0.018466
SLC1A2	11p13-p12	0.0185461
CD276	15q23-q24	0.0185465
PIF1	15q22.31	0.0185499
RAB32	6q24.3	0.0185541
MATR3	5q31.2	0.018583
SIAE	11q24	0.0186239
TPP1	11p15	0.0186834
THEMIS	6q22.33	0.0186852
PTPRE	10q26	0.0187839
ZFP42	4q35.2	0.0188233
ATP9B	18q23	0.0188717
LOC101928937	---	0.0189244
SLC24A1	15q22	0.0190209
MS4A4A	11q12	0.0190342
ZNF568	19q13.12	0.0190486
OR10D3	11q24.2	0.0190617
TRPM1	15q13.3	0.0190822
FXN	9q21.11	0.0192557
KLC3	19q13	0.0192619
CD14	5q31.1	0.019309
DIP2B	12q13.12	0.0194251
2018-03-11	5p15.1	0.0197204
PAPD7	5p15	0.0197416
ADGRA3	4p15.2	0.0197705
RPL23	17q	0.0197886
GOLGA1	9q33.3	0.0197911
TCOF1	5q32	0.019843
SPAG11A	8p23.1	0.0198963
ZNF41	Xp11.23	0.0199332
CSAD	12q13.11-q14.3	0.019936
LAMP2	Xq24	0.019941
RECQL5	17q25	0.0199924
CD2BP2	16p11.2	0.0199988
CARD16	11q22	0.0200041
ZEB2	2q22.3	0.0200872
KCNS3	2p24	0.0201496
2018-03-01	4q32.2	0.0201939
EPHA7	6q16.1	0.0202365
AGAP11	10q23.2	0.0202851
LACTB	15q22.1	0.0202876
ABCB4	7q21.1	0.0203109
SPCS2	11q13.4	0.020314
WHAMMP2	15q11.2	0.0203784
DNAH1	3p21.1	0.0204054
C10orf128	10q11.23	0.0204633
FAM120A	9q22.31	0.0207288
IL7R	5p13	0.0207326
MAATS1	3q13.33	0.0208334
TCF4	18q21.1	0.0208428
TNFRSF17	16p13.1	0.0208691
NKX2-2	20p11.22	0.0208843
SH3BGRL	Xq13.3	0.0208859
RHOH	4p13	0.0209284
GAS7	17p13.1	0.0209635
MYCNOS	2p24.1	0.0209929
TSC22D3	Xq22.3	0.0210227
TRAM1	8q13.3	0.0212099
GPR82	Xp11.4	0.0213258
CHPT1	12q	0.0213274
SLC6A8	Xq28	0.0213776
ST8SIA1	12p12.1-p11.2	0.0214455
2018-09-06	Xq24	0.0214464
SMG7	1q25	0.0215905
LOC642852	21q22.3	0.0216268
DHX36	3q25.2	0.021679
CASP1	11q23	0.0217104
KCNIP3	2q21.1	0.0217931
STAT4	2q32.2-q32.3	0.0217998
CPM	12q14.3	0.0218742
NAGPA	16p13.3	0.0219209
FILIP1L	3q12.1	0.021988
DACT2	6q27	0.0220752
PKNOX1	21q22.3	0.0221323
PSAPL1	4p16.1	0.0221839
SSPN	12p11.2	0.0222148
ZNF519	18p11.21	0.0222269
ARHGDIB	12p12.3	0.0222583
ZCCHC7	9p13.2	0.0222926
LOC105376323	---	0.0223085
DEFB107A	8p23.1	0.0223308
IRF2	4q34.1-q35.1	0.0223518
ATM	11q22-q23	0.0224214
CD86	3q21	0.0224236
LINC01120	2q21.1	0.0225453
API5	11p11.2	0.0225964
BATF	14q24.3	0.0227835
SERPINB5	18q21.33	0.0229527
SERPINA1	14q32.1	0.0229905
CALM1	14q32.11	0.0229953
ICA1L	2q33.2	0.0231079
CNPY1	7q36.3	0.023167
IGFBP7	4q12	0.02323
PQLC2L	3q25.32	0.0232693
HSPA13	21q11	0.0233433
FCRL3	1q21-q22	0.0233461
RPUSD3	3p25.3	0.0233863
OSTF1	9q13-q21.2	0.0234233
RBM15B	3p21.2	0.0234455
ACRV1	11q24.2	0.0234476
LOXL2	8p21.3	0.0235914
GUSB	7q21.11	0.0235939
PAPSS2	10q24	0.0237194
LPAR1	9q31.3	0.0237237
SCARB2	4q21.1	0.0238474
CD33	19q13.3	0.0238971
PPIB	15q21-q22	0.0239667
PELO	5q11.2	0.0239942
NKAIN3	8q12.3	0.0241248
CNOT6L	4q13.3	0.0241304
STK10	5q35.1	0.0242205
LZTS1	8p22	0.024346
SLC31A1	9q32	0.0244282
HEPH	Xq11-q12	0.0244406
LRCH3	3q29	0.0244407
PAX9	14q13.3	0.0245498
FYB	5p13.1	0.0246288
METAP1D	2q31.1	0.0246538
RSRC1	3q25.32	0.0247034
KRTAP7-1	21q22.11	0.0247095
DPY19L2P3	7p15.1	0.0247622
DOPEY1	6q15	0.0248803
MPO	17q23.1	0.0248822
SYCP1	1p13-p12	0.0250103
FOXO1	13q14.1	0.0250851
DSE	6q22	0.025131
MUT	6p12.3	0.0251612
LY96	8q21.11	0.0251807
LMLN	3q29	0.0252189
SRSF5	14q24	0.0252319
CEBPG	19q13.11	0.0252535
NCAPH2	22q13.33	0.02527
TPH1	11p15.3-p14	0.0253021
RAD1	5p13.2	0.0255325
ERICH1	8p23.3	0.0255538
TOR1AIP1	1q24.2	0.025591
TERT	5p15.33	0.0257119
LOC101929153	5p15.32	0.0257512
PSEN1	14q24.3	0.0258015
KLK11	19q13.33	0.0259556
DAZAP2	12q12	0.0260393
ABCF3	3q27.1	0.0260701
PTP4A3	8q24.3	0.0260933
IL2RB	22q13.1	0.0261089
AKAP17A	Xp22.33 and Yp11.32	0.0261216
TFAM	10q21	0.026155
WNK1	12p13.3	0.026219
DKK3	11p15.2	0.02628
EAF2	3q13.33	0.0263406
CRTAM	11q24.1	0.0263681
LCK	1p34.3	0.0265172
ATOH7	10q21.3|10q21.3-q22.1	0.0266275
TDH	8p23.1	0.026638
DIAPH1	5q31	0.0266509
ALDH1A3	15q26.3	0.0266649
NUCB2	11p15.1	0.0266829
PCCA	13q32	0.0267064
PAH	12q22-q24.2	0.026745
NADSYN1	11q13.4	0.026884
AKNAD1	1p13.3	0.0269065
LOC105377458	---	0.0269543
SPG11	15q14	0.0270271
PLCL1	2q33	0.0270437
TAB3	Xp21.2	0.0271118
SLC22A5	5q23.3	0.0271281
AKR1C1	10p15-p14	0.0271405
NRIP1	21q11.2	0.0271467
MTMR9	8p23-p22	0.0271768
ZMYM5	13q12	0.0273061
TRMT44	4p16.1	0.0273322
GABARAP	17p13.1	0.0273931
FAM9B	Xp22.32	0.0274319
RCBTB2	13q14.3	0.0274324
C11orf87	11q22.3	0.0275315
CARD16	11q22	0.0276001
INSL3	19p13.2-p12	0.0276698
MLXIP	12q24.31	0.0277324
GABRP	5q35.1	0.0278157
LINC01016	---	0.0278622
SF3B3	16q22.1	0.0278854
SLC16A3	17q25	0.028008
BECN1	17q21	0.0280209
NAP1L1	12q21.2	0.0280984
GPRC5A	12p13.1	0.0281296
CD28	2q33	0.0281398
RGS1	1q31	0.0282805
DECR1	8q21.3	0.0284423
SPINK1	5q32	0.0284966
DIXDC1	11q23.1	0.0285166
NDST1	5q33.1	0.0285423
TMCO5A	15q14	0.0286346
CTSB	8p22	0.0286561
DAZL	3p24.3	0.0287273
BCL11A	2p16.1	0.0287611
ACHE	7q22	0.0288025
DEFB119	20q11.21	0.0288819
LINC00691	3p24.2	0.0289694
KRT17	17q21.2	0.0290805
LINC00622	1p12	0.029111
ZMAT3	3q26.32	0.0291177
ZNF831	20q13.32	0.0291578
SP100	2q37.1	0.0291712
TBC1D10A	22q12.2	0.0292557
ANKMY1	2q37.3	0.0292557
SETBP1	18q21.1	0.0294496
ZNF248	10p11.2	0.0295936
MPHOSPH9	12q24.31	0.0296764
LOC101929759	---	0.0296863
SAE1	19q13.32	0.0297043
MLH3	14q24.3	0.0297513
SNED1	2q37.3	0.0298182
ST8SIA4	5q21	0.0299653
PIK3IP1	22q12.2	0.0300281
PLXNA1	3q21.3	0.0300425
PRKAR1A	17q24.2	0.0300578
DHX30	3p21.31	0.030101
SUGT1P1	9p13.3	0.0301842
LOC646268	1q23.1	0.0301968
ACADM	1p31	0.0302482
LOC105372966	---	0.0302495
CYP3A5	7q21.1	0.0302573
EXD1	15q15.1	0.0303319
KPNA1	3q21	0.0303387
KLF12	13q22	0.0304504
TNR	1q24	0.030511
ITGA2B	17q21.32	0.0305431
APOC4-APOC2	19q13.2	0.0305467
PECAM1	17q23.3	0.0305472
POLR1B	2q13	0.0305553
DYNLRB1	20q11.21	0.0305788
LOC284080	17q21.33	0.0305963
CD44	11p13	0.0306128
REST	4q12	0.030616
WTAP	6q25-q27	0.0306793
LOC100129029	2q24.1	0.0307438
CCDC14	3q21.1	0.0308352
GFOD1	6pter-p22.1	0.0308761
CLEC2B	12p13-p12	0.03088
CIRBP	19p13.3	0.0308802
PGAM1	10q25.3	0.0310133
PRCP	11q14	0.0310449
USP25	21q11.2	0.0310819
LUM	12q21.33	0.0311179
VAV1	19p13.3	0.0311392
CD27	12p13	0.0312026
MAP3K8	10p11.23	0.031251
RNF6	13q12.2	0.0312991
MKNK1	1p33	0.0312994
SIPA1L2	1q42.2	0.031441
TAB2	6q25.1	0.0315701
RPL27A	11p15	0.0316673
LOC105372953	---	0.0316739
CKAP5	11p11.2	0.0317401
RAB7A	3q21.3	0.0317405
NCF4	22q13.1	0.0317522
TFDP2	3q23	0.0318479
SH3PXD2B	5q35.1	0.0318631
LINC00535	8q22.1	0.031977
TPR	1q25	0.0319806
PPP5D1	---	0.0319843
GIMAP1	7q36.1	0.0320175
MAN2C1	15q24.2	0.0320392
CDKAL1	6p22.3	0.0320455
MAN2A1	5q21.3	0.0322431
HHEX	10q23.33	0.0322547
ARHGAP26	5q31	0.0322694
LOC100131170	17q25.3	0.0322822
SLC2A13	12q12	0.0323779
EGFR	7p12	0.0324461
TRAPPC13	5q12.3	0.0326383
SUPT7L	2p23.3	0.0326396
SHISA9	16p13.12	0.0327063
CDK12	17q12	0.0327283
TACC1	8p11.22	0.0328338
ANP32A	15q23	0.0329044
TLK1	2q31.1	0.0331432
MLX	17q21.1	0.0331583
FAM98B	15q14	0.0331628
LOC101928298	10p14	0.0331669
CH17-408M7.1	1q21.1	0.0332083
TNRC6A	16p11.2	0.0333094
MAGEA2	Xq28	0.0333552
MTF1	1p33	0.0333684
OGFR	20q13.3	0.0333708
TGFBR1	9q22	0.0334062
NDUFB1	14q32.12	0.0334227
POLK	5q13	0.033434
KCNE4	2q36.1	0.0335262
TERF1	8q21.11	0.0335447
RANBP9	6p23	0.0335541
PCBP1-AS1	2p14	0.0335778
GRAMD4	22q13.31	0.033584
ACAA1	3p22.2	0.0336586
DHX9	1q25	0.0337045
CLIP1	12q24.3	0.0337308
RHOBTB3	5q15	0.0337432
HPS1	10q23.1-q23.3	0.0337928
SCAND2P	15q25.2	0.033825
STOML3	13q13.3	0.0338254
LOC283484	13q33.3	0.0338313
NLRX1	11q23.3	0.0339268
SYNRG	17q12	0.0339534
TTF2	1p22	0.0339838
NRP1	10p12	0.0340716
CHURC1-FNTB	14q23	0.0341133
FRYL	4p11	0.0341527
KIAA1456	8p22	0.0342518
CEP128	14q31.1	0.0344014
DDX5	17q21	0.03443
ZBED3-AS1	5q13.3	0.0344524
STK17A	7p13	0.0344683
RHBDD3	22q12.2	0.0344921
TPD52	8q21.13	0.0345245
ENTPD3	3p21.3	0.0345497
ADARB1	21q22.3	0.0346135
UGCG	9q31	0.0346346
AGO2	8q24	0.0346406
CD300LF	17q25.1	0.0346929
DAOA	13q33.2|13q34	0.0346994
LOC105373113	---	0.0347172
CRISPLD2	16q24.1	0.0348899
RGS13	1q31.2	0.0349383
PSIP1	9p22.3	0.0349443
GGPS1	1q43	0.0350132
TLR4	9q33.1	0.0350717
RFT1	3p21.1	0.0350969
SHC3	9q22.1	0.0352285
COX4I1	16q24.1	0.0352506
SP140L	2q37.1	0.0352506
RGP1	9p13.3	0.0352828
RHOA	3p21.3	0.0353299
TCFL5	20q13.33	0.0353672
PPP2R3C	14q13.2	0.035428
LOC375196	2p22.3	0.0355296
KSR2	12q24.22-q24.23	0.0356301
ATP11A-AS1	13q34	0.0356878
BRWD3	Xq21.1	0.0357845
FAM126B	2q33.1	0.0357982
LOC100506730	1p36	0.0358937
SIK3	11q23.3	0.0359206
AMPD1	1p13	0.0360524
NOL4L	20q11.21	0.0360983
SNX17	2p23.3	0.0361652
ADAMTSL1	9p21.3	0.0361893
GNL2	1p34.3	0.0362473
PPRC1	10q24.32	0.0362775
CEACAM1	19q13.2	0.0363268
TM2D1	1p31.3	0.0363357
PDHA1	Xp22.1	0.0364902
TMIE	3p21	0.0365637
PIK3AP1	10q24.1	0.0366518
USF3	3q13.2	0.0366522
NSUN4	1p34	0.036715
TPBG	6q14-q15	0.0367217
C22orf31	22q12.1	0.0367661
TRIM3	11p15.5	0.0368261
SCPEP1	17q22	0.0368337
IL10RA	11q23	0.0368392
OXTR	3p25	0.0368893
MROH2B	5p13.1	0.0369011
ARHGAP26-AS1	---	0.0369267
CTSA	20q13.1	0.0369905
ATP5SL	19q13.2	0.0370806
LOC101927348	16p13.12	0.0371612
PEX2	8q21.1	0.0372217
SPATA13	13q12.12	0.0372988
RAD54L	1p32	0.0373186
METTL15	11p14.1	0.0373535
CRHR1-IT1	17q21.31	0.0374089
FBLN1	22q13.31	0.037426
RER1	1p36	0.0374633
NIPSNAP1	22q12.2	0.0374854
TMEM182	2q12.1	0.0375874
SEC23IP	10q25-q26	0.0376291
SERPINF1	17p13.3	0.0376871
CACNA1D	3p14.3	0.0377609
LPIN2	18p11.31	0.0377831
PKP4	2q24.1	0.0378036
SHOC2	10q25	0.0378989
ZDHHC18	1p36.11	0.0379838
PDCD6	5p15.33	0.0379842
HSD17B12	11p11.2	0.0380886
CNTFR-AS1	9p13	0.0381512
PPARGC1B	5q32	0.0381743
YIF1B	19q13.2	0.0382107
GRSF1	4q13	0.0382366
TMBIM6	12q13.12	0.038237
IL27RA	19p13.11	0.0382568
RUNX1T1	8q22	0.0382573
TET3	2p13.1	0.0383137
HES1	3q28-q29	0.038368
NETO1	18q22.2	0.0384194
SNX20	16q12.1	0.0384479
ALDH6A1	14q24.3	0.0384677
NPR2	9p21-p12	0.038512
ATP7A	Xq21.1	0.0386774
GPR12	13q12	0.0386963
CYB5B	16q22.1	0.0387184
SOX9-AS1	17q24.3	0.0387464
EBF2	8p21.2	0.0387708
SLC24A4	14q32.12	0.0387905
LINC00299	2p25.1	0.0387942
ELK3	12q23	0.0387944
SNTB2	16q22.1	0.0388516
APP	21q21.3	0.0388824
TNFAIP3	6q23	0.0388913
EFCAB14	1p33	0.0389647
EBNA1BP2	1p35-p33	0.0390286
TWF1	12q12	0.0390379
SLC39A6	18q12.2	0.0393313
SLC16A2	Xq13.2	0.0394513
HGD	3q13.33	0.0395844
COPS8	2q37.3	0.0395928
PIGL	17p11.2	0.0395931
CTSD	11p15.5	0.0396327
FILIP1	6q14.1	0.039637
IQCH	15q23	0.039644
IL12RB1	19p13.1	0.0396569
SH3GL1	19p13.3	0.0396837
PTMA	9q22.32	0.039686
BMPR1A	10q22.3	0.0397607
NR3C1	5q31.3	0.0397756
DGKE	17q22	0.0398003
ESR1	6q25.1	0.0398464
EDIL3	5q14	0.0399137
GRIA2	4q32.1	0.0400325
RUFY2	10q21.3	0.0400801
CD74	5q32	0.0401309
ATP6V0D2	---	0.040242
ZFYVE9	1p32.3	0.0404004
ATP6V1C1	8q22.3	0.0404377
HNRNPDL	4q21.22	0.0405782
RPS16	19q13.1	0.0406164
FDX1	11q22	0.0406682
MVB12B	9q33.3	0.0406932
TMEM106A	17q21.31	0.0407601
UBE2D3	4q24	0.0408644
ZNF578	19q13.41	0.0408758
LAMA3	18q11.2	0.0409604
HS3ST3B1	17p12	0.0409639
ANKRD20A1	2q11.1	0.0410027
RBM26-AS1	---	0.0411011
ZBTB44	11q24.3	0.0412189
PPP1R7	2q37.3	0.0412656
PIP4K2A	10p12.2	0.0414015
BMP6	6p24-p23	0.0414126
LOC105375531	---	0.0414151
MAN2A2	15q26.1	0.041419
AMER2	13q12.13	0.0414613
LINC00910	17q21.31	0.0415709
COX5B	2q11.2	0.0415789
WDR20	14q32.31	0.0415929
BEST3	12q15	0.0416265
IVD	15q14-q15	0.0416485
NLRC4	2p22.3	0.0416812
CARD11	7p22	0.0417421
GZMK	5q11.2	0.0417614
FCRL2	1q21	0.0417931
ACAP2	3q29	0.0418451
RAC3	17q25.3	0.0419137
RPS6KA1	1p	0.0420232
TROAP	12q13.12	0.0420745
INTS4	11q14.1	0.0420799
LEPR	1p31	0.0421602
CENPI	Xq22.1	0.0422172
ARHGAP25	2p13.3	0.0422222
GRID1	10q22	0.0423692
SCRN1	7p14.3	0.0424293
GNS	12q14	0.0424889
KLF14	7q32.3	0.0425933
LOC101928516	---	0.0425934
LOC100132356	5p12	0.0426045
PTPRB	12q15-q21	0.0426305
LPAR6	13q14	0.0426523
LOC101927876	1p36.13	0.0426704
SREK1	5q12.3	0.0426947
FARP1	13q32.2	0.0427083
MAGI1-IT1	3p14.3	0.042786
MINA	3q11.2	0.0427875
SDF2	17q11.2	0.0429518
AGTR1	3q24	0.0429892
TSNARE1	8q24.3	0.0430332
MNDA	1q22	0.0430626
LILRB4	19q13.4	0.0430877
PLEKHO2	15q22.1	0.0431282
PLA2G4C	19q13.3	0.0432323
SLC5A3	21q22.12	0.0432729
PDS5B	13q12.3	0.043361
SOX3	Xq27.1	0.043385
CD163	12p13.3	0.0433954
A2M	12p13.31	0.0435588
TNFRSF13C	22q13.1-q13.31	0.0435876
CD48	1q21.3-q22	0.0436309
EAPP	14q13.1	0.0437925
RHBDL2	1p34.3	0.0438266
PRKACB	1p31.1	0.0438491
NBPF3	1p36.12	0.0438873
FAR2	12p11.22	0.0438896
TMED5	1p22.1	0.0439505
SRPR	11q24.2	0.0439736
CEP72	5p15.33	0.0440091
RAPGEF5	7p15.3	0.044028
LOC339468	1p31.1	0.0441992
TOP2A	17q21.2	0.0442564
CSRP1	1q32	0.0443035
CD180	5q12	0.0443329
HEATR6	17q23.1	0.0444364
CDSN	6p21.3	0.0445303
GRIN2D	19q13.33	0.044552
C20orf202	20p13	0.0446203
SPARC	5q31.3-q32	0.0446394
HTR2B	2q36.3-q37.1	0.0446424
LATS1	6q25.1	0.044653
SCAMP1	5q14.1	0.0446779
MED6	14q24.2	0.0446964
CLEC4GP1	19p13.2	0.0450855
GATA4	8p23.1-p22	0.0452393
PTP4A1	6q12	0.0453138
UEVLD	11p15.1	0.0453348
RASEF	9q21.32	0.0453428
ELF3	1q32.2	0.0454295
CATSPER2	15q15.3	0.0454435
DGKA	12q13.3	0.0454508
RAP1A	1p13.3	0.0454558
MAGEC1	Xq26	0.045459
ZNF253	19p13.11	0.0454871
ANG	14q11.1-q11.2	0.0455061
HNMT	2q22.1	0.045518
KLHL14	18q12.1	0.0456693
ATXN3	14q21	0.0457605
PPARA	22q13.31	0.0458203
IPO5P1	19p12	0.0458356
TK2	16q22-q23.1	0.0458443
TECPR2	14q32.31	0.0458587
NOL3	16q22.1	0.0459311
FOXJ3	1p34.2	0.0459846
CNIH1	14q22.2	0.0459878
LINC01494	2q35	0.0460006
WASH1	9p24.3	0.0460761
ARPC1A	7q22.1	0.0461213
STRN	2p22.2	0.0461421
LOC151760	3q13.13	0.0461773
KLHL34	Xp22.12	0.0461994
GAFA2	16q23.2	0.0463196
GALNT3	2q24-q31	0.046342
LOC101928700	---	0.0465081
GNB5	15q21.2	0.0467306
LACC1	13q14.11	0.0467489
GAPT	5q11.2	0.0467693
EIF4E	4q23	0.0468563
MRE11A	11q21	0.0469237
CPSF4	7q22.1	0.0469358
PTK2	8q24.3	0.0470217
IL16	15q26.3	0.047034
MTAP	9p21	0.0472013
LINC01395	11q24.3	0.0472384
ACLY	17q21.2	0.047306
HLA-DRB1	6p21.3	0.0473576
FGL2	7q11.23	0.0473867
PARM1	4q13.3-q21.3	0.0474062
DEDD	1q23.3	0.0474442
BRE	2p23.2	0.0474451
ARL10	5q35.2	0.0474857
LINC00476	9q22.32	0.0475306
PTAFR	1p35-p34.3	0.0475423
CMTM4	16q21-q22.1	0.0475962
SNORA74A	5q31.2	0.0476669
TREML3P	6p21.1	0.0477035
CFI	4q25	0.0477047
NME3	16q13.3	0.0477355
NLRP1	17p13.2	0.0477576
VASH2	1q32.3	0.0478511
MAP2K1	15q22.1-q22.33	0.0478752
LINC01535	19q13.12	0.0478768
CEP57	11q21	0.0479357
NOP56	20p13	0.0479502
UBAP2L	1q21.3	0.0480521
CD37	19q13.3	0.0480627
CASP10	2q33-q34	0.0481053
ARPC4-TTLL3	3p	0.0482085
SENP6	6q14.1	0.0482155
TEAD1	11p15.2	0.0482221
STX6	1q25.3	0.0482295
POU6F1	12q13.13	0.0483505
POM121L9P	22q11.23	0.0483961
PTPN18	2q21.1	0.0484597
LOC101928307	6q12	0.0484836
FAM161A	2p15	0.0485544
ATP5J2	7q22.1	0.0485853
ZNF74	22q11.21	0.0486445
SLC16A7	12q13	0.0486931
YLPM1	14q24.3	0.0487656
SLFN5	17q12	0.0487942
DNAJC14	12q13.2	0.0488308
IFT43	14q24.3	0.0490264
SLAMF1	1q23.3	0.0490746
PADI2	1p36.13	0.0491637
NQO2	6p25.2	0.0491777
F13A1	6p25.3-p24.3	0.0492179
MMP2	16q12.2	0.0492417
ANP32B	9q22.32	0.049246
PRR5L	11p13-p12	0.0492494
CD79A	19q13.2	0.0492543
CDK17	12q23.1	0.0492574
KIAA0040	1q25.1	0.0493324
LRRC27	10q26.3	0.0493627
IGF1R	15q26.3	0.0493853
UBR4	1p36.13	0.0494781
SOGA3	6q22.33	0.0494923
PCDH7	4p15	0.0494933
DNAJC5B	8q13.1	0.0494988
CLU	8p21-p12	0.0495077
CHDH	3p21.1	0.0495855
ZNF441	19p13.2	0.0496851
GPX1	3p21.3	0.0496991
GNB2L1	5q35.3	0.0497733
AKT2	19q13.1-q13.2	0.0497902
VAMP5	2p11.2	0.0498195
TAF6	7q22.1	0.0498372
DTYMK	2q37.3	0.0498482
