# Supplementary material for: Whole Genome Transcriptome Analysis of the Association between Obesity and Triple Negative Breast Cancer in Caucasian Women
Source: Preprints.org preprint supplement (doi:10.20944/preprints201803.0174.v1), 2018-03-20
Supplement: Supplementary file 7 [file Table SB.xlsx]

## Sheet: Sheet1
Table SB. List of significantly differentially expressed genes showing evidence of association with TNBC at P<0.05 among the three patient groups in women with postmenopausal status.
Gene Symbol	Cytoband	unadj.p
IL4R	16p12.1-p11.2	2.15e-05
TAGLN2	1q21-q25	3.14e-05
ZNF92	7q11.21	3.74e-05
MSX1	4p16.2	4.69e-05
EPHA2	1p36	4.98e-05
SERPINE1	7q22.1	7.71e-05
PANX1	11q21	0.0001013
PDPN	1p36.21	0.0001052
KEAP1	19p13.2	0.0001613
STK10	5q35.1	0.0001788
KLF9	9q13	0.0001886
JRK	8q24.3	0.0002137
PLK3	1p34.1	0.0002137
ZNF138	7q11.21	0.0002187
PLEC	8q24	0.0002996
FPR1	19q13.4	0.0002997
CR1	1q32	0.0003166
ZNF85	19p12	0.0003172
TNC	9q33	0.0003209
SLC2A3	12p13.3	0.000333
ANGPT2	8p23.1	0.0003379
MESDC1	15q13	0.0003637
ZEB2	2q22.3	0.0003702
CSGALNACT1	8p21.3	0.0003867
MUT	6p12.3	0.0004008
YWHAZ	8q23.1	0.0004641
ZNF140	12q24.33	0.0004857
PRKACA	19p13.1	0.0004911
MVP	16p11.2	0.0004982
COPS8	2q37.3	0.0005052
SEC23A	14q21.1	0.0005406
NNMT	11q23.1	0.0005595
YWHAH	22q12.3	0.0005786
SRSF7	2p22.1	0.0005989
CD163	12p13.3	0.0006026
HAS2	8q24.12	0.0006326
SCG2	2q35-q36	0.000639
LRRFIP1	2q37.3	0.0006587
PTPRE	10q26	0.0006598
EHD4	15q11.1	0.0006697
ZNF736	7q11.21	0.0006798
LOC101927523	10q25.1	0.0007021
DUSP1	5q34	0.0007209
PLP2	Xp11.23	0.0007594
TWIST2	2q37.3	0.0007638
WWTR1-AS1	3q25.1	0.000804
GRIA3	Xq25	0.0008166
SEC62	3q26.2	0.0008733
IL6	7p21	0.0008745
KANSL1L	2q34	0.0008764
SCARF1	17p13.3	0.0009024
PROM2	2q11.1	0.0009178
RAPGEF2	4q32.1	0.0009274
BCAR3	1p22.1	0.0009371
OSMR	5p13.1	0.0009449
SMAD5	5q31	0.0009486
SPPL3	12q24.31	0.0009713
ZNF493	19p12	0.0010407
ZNF253	19p13.11	0.0010869
CTDSP2	12q14.1	0.0011055
BCAP29	7q22.3	0.001117
ADAMTSL1	9p21.3	0.0011187
RBMS1	2q24.2	0.0011542
C11orf54	11q21	0.0011565
ITGA5	12q11-q13	0.0012439
CARHSP1	16p13.2	0.00125
STK17B	2q32.3	0.0012749
CCNY	10p11.21	0.0012754
WBP1L	10q24.32	0.0012863
SMG7	1q25	0.0013843
ADAM23	2q33	0.0014375
KCNQ3	8q24	0.0014611
NADSYN1	11q13.4	0.0014686
ATM	11q22-q23	0.0014751
TLR4	9q33.1	0.0015025
SSH1	12q24.11	0.0015551
SLC2A11	22q11.23	0.001586
KLF7	2q32	0.0015893
FADS2	11q12.2	0.0015926
STARD8	Xq13.1	0.0016279
CDYL2	16q23.2	0.0016504
PKD2	4q22.1	0.0016545
C6orf141	6p12.3	0.0016716
ZNF230	19q13.31	0.0016835
WWC2	4q35.1	0.0016969
HNF4A-AS1	---	0.0017033
VNN2	6q23-q24	0.0017114
FOSL2	2p23.3	0.0017371
NEK1	4q33	0.0017416
SMS	Xp22.1	0.0017423
SRSF9	12q24.31	0.0017736
ZNF43	19p13.1-p12	0.0017774
TRPC1	3q23	0.0018024
PELO	5q11.2	0.0018041
BBS9	7p14	0.0018112
PIGL	17p11.2	0.0018731
PML	15q22	0.001961
ZNF506	19p13.11	0.0020245
HBEGF	5q23	0.0020341
COQ10B	2q33.1	0.0020856
PSMF1	20p13	0.0021051
S100A3	1q21	0.0021376
ARF1	1q42	0.0021431
HMGCLL1	6p12.1	0.0021743
CADM2	3p12.1	0.0022022
ING3	7q31	0.0022179
PAPPA	9q33.2	0.0022283
NDST1	5q33.1	0.0022411
SLC25A27	6p12.3	0.0022699
MKL1	22q13	0.0023023
SNAPC1	14q22	0.0023116
DAG1	3p21	0.002344
CEBPD	8p11.2-p11.1	0.002421
GGT5	22q11.23	0.0024576
RB1	13q14.2	0.0024653
BDKRB2	14q32.1-q32.2	0.0025185
DOCK4	7q31.1	0.0025407
SYTL3	6q25.3	0.0025587
LEPROTL1	8p12	0.0025739
TCF4	18q21.1	0.0026207
JUNB	19p13.2	0.0026477
STX8	17p12	0.0027034
FCN1	9q34	0.0027037
IL1B	2q14	0.0027102
MTAP	9p21	0.0027552
LOC105371232	---	0.0027682
CCDC7	10p11.22	0.0027698
CYP2U1	4q25	0.0027882
TMC6	17q25.3	0.0028075
BAHD1	15q15.1	0.002883
C11orf57	11q23.1	0.0028985
ZFP36	19q13.1	0.0029261
PTGER4	5p13.1	0.0029397
LRCH3	3q29	0.0029494
MAF	16q22-q23	0.0029696
FGFR4	5q35.2	0.0030136
ZNF12	7p22.1	0.0030417
PLXNC1	12q23.3	0.0030713
OPCML	11q25	0.0030946
ELK3	12q23	0.0031129
PXN	12q24.31	0.0031369
VIP	6q25	0.0032034
S1PR1	1p21	0.003221
ITGB5	3q21.2	0.0033039
VIL1	2q35	0.0033112
RAP1B	12q14	0.0033211
DUSP4	8p12-p11	0.0033832
SOCS3	17q25.3	0.0034884
GPR4	19q13.3	0.0035056
ZBTB3	11q12.3	0.0035324
STAB1	3p21.1	0.0035446
HPCAL1	2p25.1	0.003593
BCL10	1p22	0.0036088
FGF7	15q21.2	0.0036577
PAX8	2q13	0.0036783
TNFAIP6	2q23.3	0.0037
PTAFR	1p35-p34.3	0.0037013
RPN1	3q21.3	0.003707
LOXL2	8p21.3	0.0037593
RTEL1-TNFRSF6B	20q13.3	0.0037701
ZKSCAN5	7q22	0.0038077
2018-03-01	4q32.2	0.0038353
IDS	Xq28	0.0038483
CSF1R	5q32	0.0038537
MGAT2	14q21	0.0038598
LOC101928614	---	0.0038608
PICALM	11q14	0.003863
IGBP1	Xq13.1-q13.3	0.0038799
ATG10	5q14.1	0.0038848
FCGR3A	1q23	0.0039387
PAK2	3q29	0.0039769
RAB34	17q11.2	0.0039818
LOC101927865	2q33.3	0.0039897
ALS2CR11	2q33.1	0.0039993
GPX1	3p21.3	0.0040222
CCNH	5q13.3-q14	0.0041266
IL1RAP	3q28	0.0041302
KIAA1109	4q27	0.0041386
PITPNC1	17q24.2	0.0041435
PLTP	20q13.12	0.0041442
TGFBRAP1	2q12.1	0.0041521
EPM2AIP1	3p22.1	0.0041967
KLHL4	Xq21.3	0.0042189
ZNF280D	15q21.3	0.0042225
CPE	4q32.3	0.0042336
MRPS12	19q13.1-q13.2	0.0042563
GLI2	2q14	0.0042573
TAF7	5q31	0.0042625
CTSL	9q21.33	0.004283
PRKACB	1p31.1	0.0042918
ASAP1-IT2	---	0.0043276
LYNX1	8q24.3	0.0044442
DUOXA1	15q21.1	0.0044446
FAS	10q24.1	0.0044597
CSRNP3	2q24.3	0.0044948
ATMIN	16q23.2	0.0044975
MGAT1	5q35	0.0045016
LRRC25	19p13.11	0.004609
PGD	1p36.22	0.0046571
RMDN2	2p22.2	0.0046781
ARHGAP26	5q31	0.0046933
PTPN3	9q31	0.0047166
EVPL	17q25.1	0.0047168
PEBP1	12q24.23	0.0047922
HS2ST1	1p22.3	0.0048134
PCDHGA1	5q31	0.0048234
SP100	2q37.1	0.0049432
SDCBP	8q12	0.0049443
ADD3	10q25.2	0.0049457
CGNL1	15q21.3	0.0049948
NT5E	6q14-q21	0.0050085
ACLY	17q21.2	0.0050349
PGM2L1	11q13.4	0.0050399
MAP7	6q23.3	0.0050496
PPP2R2A	8p21.2	0.0050903
TSPAN17	5q35.3	0.0051598
ZNF202	11q24	0.0051839
SRPX	Xp21.1	0.0052019
RHOG	11p15.5-p15.4	0.0052143
PAXIP1-AS2	7q36.2	0.0052365
AP2M1	3q28	0.0052379
FGF7	15q21.2	0.0052406
TIMD4	5q33.3	0.0052531
LPAR1	9q31.3	0.005279
CREB5	7p15.1	0.0052798
ACOT11	1p32.3	0.0053165
DSE	6q22	0.0053297
ICMT	1p36.21	0.0053972
LOC401320	7p15.1	0.0054026
ZNF592	15q25.3	0.0054086
TGFBI	5q31	0.0054434
KLHL8	4q22.1	0.0055167
MAP4K4	2q11.2-q12	0.0055302
TRIM13	13q14	0.0056562
ODF3	11p15.5	0.0056623
OGDH	7p14-p13	0.005694
IQGAP1	15q26.1	0.0056985
CCL13	17q11.2	0.0056985
NR3C1	5q31.3	0.0057533
PPIP5K2	5q21.1	0.0057533
ABL1	9q34.1	0.0058068
ADAMTS9	3p14.1	0.005819
TTC3	21q22.2	0.0059593
DNPH1	6p21.1	0.0059977
STK17A	7p13	0.0060752
ST7L	1p13.2	0.0060908
RTTN	18q22.2	0.0061082
MAATS1	3q13.33	0.0061438
CYR61	1p22.3	0.0062517
TNPO1	5q13.2	0.0062539
FTH1	11q13	0.006254
TFAP2A-AS1	6p24.3	0.0062568
CCSAP	1q42.13	0.0063079
PTK2	8q24.3	0.0063479
CXorf36	Xp11.3	0.0063651
ZC3H14	14q31.3	0.0064951
MAGI2-IT1	7q21.11	0.0065955
DCTN6	8p12	0.0066096
SIVA1	14q32.33	0.0066222
HDAC5	17q21	0.006733
GCLC	6p12	0.0067418
STEAP1	7q21	0.0067586
NFE2L2	2q31	0.0067685
SKAP2	7p15.2	0.006794
FDPS	1q22	0.0067951
SMAD3	15q22.33	0.0068315
SNX19	11q25	0.0068861
SDHC	1q23.3	0.006896
ABHD2	15q26.1	0.0069035
ESR1	6q25.1	0.006908
SAMHD1	20pter-q12	0.0069309
ZNF277	7q31.1	0.0069519
MMRN1	4q22	0.0069587
DLG2	11q14.1	0.0069588
AP3S1	5q22	0.0069685
SQLE	8q24.1	0.0069751
RAB11FIP2	10q26.11	0.0069932
LYZ	12q15	0.0070192
TRAPPC12	2p25.3	0.0070196
WASH1	9p24.3	0.0070836
HMGA1	6p21	0.007168
YEATS2	3q27.1	0.0072378
HNMT	2q22.1	0.0072445
CNN2	19p13.3	0.0072522
ABCA3	16p13.3	0.007273
SSBP2	5q14.1	0.0073374
LOC100506679	22q13.2	0.0074416
CCDC140	2q36.1	0.0074511
PRPSAP1	17q24-q25	0.0074791
CD14	5q31.1	0.0074813
CUL5	11q22.3	0.0074832
SLC25A36	3q23	0.0074922
RSU1	10p13	0.0075221
LOC100507600	---	0.0075409
MAPK1	22q11.21	0.0076214
ENPEP	4q25	0.0076389
IBA57	1q42.13	0.0076589
FOXP2	7q31	0.0079313
TNFRSF10B	8p22-p21	0.0079598
KIAA1671	22q11.23	0.0079708
PCYT1A	3q29	0.0079832
BIRC5	17q25	0.0079836
ABCA1	9q31.1	0.0080448
CFAP74	1p36.33	0.0080493
SNU13	22q13	0.0081667
WIPI1	17q24.2	0.0081703
HK3	5q35.2	0.0082003
DLG5	10q23	0.0082009
B4GALNT2	17q21.32	0.008201
CFHR2	1q31.3	0.0082399
WIPF1	2q31.1	0.008244
SFPQ	16q24.1	0.008245
SRGAP2	1q32.1	0.008246
PPP5D1	---	0.0082646
AGFG2	7q22.1	0.0082856
TCEANC	Xp22.2	0.008288
LOC283861	16q24.3	0.0083009
TRIM32	9q33.1	0.0083249
GPC4	Xq26.1	0.0083311
MS4A4A	11q12	0.0083727
SLFNL1	1p34.2	0.0083802
LOC105373113	---	0.0083832
MSN	Xq11.1	0.0083945
BCL3	19q13.1-q13.2	0.008433
ENTPD6	20p11.21	0.0084806
SLC35G3	17q12	0.0084874
LOC100129455	2q31.1	0.0084922
ERAP2	5q15	0.0084959
UQCRB	8q22	0.0085469
ZMAT3	3q26.32	0.0086021
RELB	19q13.32	0.0086266
SIRPB2	20p13	0.0086478
ALDH3A2	17p11.2	0.0086546
SLIT3	5q35	0.0086671
MCTP1	5q15	0.0086686
VSIG4	Xq12-q13.3	0.0086721
USB1	16q21	0.0087499
MDFIC	7q31.1-q31.2	0.0088623
SCARB1	12q24.31	0.0088961
C21orf33	21q22.3	0.0089145
ZNF84	12q24.33	0.0089677
SARAF	8p12	0.0089903
ZNF195	11p15.5	0.0090364
DCLK1	13q13	0.0090746
THBD	20p11.2	0.0090988
MYL12A	18p11.31	0.009108
KCNN4	19q13.2	0.0091177
NLRP3	1q44	0.0091249
SLC29A1	6p21.1	0.0091274
SFXN5	2p13	0.0091309
INTS9	8p21.1	0.0091434
TNK2-AS1	3q29	0.009209
HMCN2	9q34.11	0.0092474
EML2	19q13.32	0.0092878
ANKRD30B	18p11.21	0.0092989
MAFK	7p22.3	0.0093301
ALDH1L2	12q23.3	0.0093782
FST	5q11.2	0.0094392
FZD5	2q33.3	0.0094861
HHEX	10q23.33	0.0095107
DCTN1-AS1	2p13	0.0095198
PPP1R15A	19q13.2	0.0095999
ITGB4	17q25	0.0096126
STX6	1q25.3	0.0096236
CREBRF	5q35.1	0.0096611
METTL13	1q24-q25.3	0.0096669
NUB1	7q36	0.0097069
CACNA1A	19p13	0.0097176
SNRK	3p22.1	0.0097212
CXCL8	4q13-q21	0.0098572
ADD2	2p13.3	0.0098746
TFIP11	22q12.1	0.0098819
AKAP1	17q22	0.0098844
APBA1	9q21.12	0.0098859
FEZ2	2p21	0.0099765
CWF19L2	11q22.3	0.0099887
NR2F1-AS1	5q15	0.01
PIP4K2A	10p12.2	0.0100455
MYO18A	17q11.2	0.0100587
SLC1A2	11p13-p12	0.0100837
KAT2A	17q21	0.0100936
GCLM	1p22.1	0.010211
SYNGR2	17q25.3	0.0102376
FBLIM1	1p36.21	0.0102726
ARHGEF9	Xq11.1	0.0102857
TTC37	5q15	0.0103599
TARBP1	1q42.3	0.0103789
FLI1	11q24.1-q24.3	0.010382
STX4	16p11.2	0.0104044
GSTM3	1p13.3	0.0104694
CSK	15q24.1	0.0104927
ARSB	5q14.1	0.0105546
AQP9	15q	0.0106368
RALB	2q14.2	0.0106501
COG2	1q42.2	0.0106657
GOLIM4	3q26.2	0.0106673
LY6E	8q24.3	0.0107165
HOXC5	12q13.3	0.0107296
DCN	12q21.33	0.0107581
SRGAP3	3p25.3	0.0107602
DR1	1p22.1	0.0107781
GLIPR1	12q21.2	0.0108039
IRS4	Xq22.3	0.0108536
COX2	---	0.0108759
2018-03-10	17q23.2	0.0108936
F3	1p22-p21	0.010941
DCAF13	8q22.3	0.0109857
CHKA	11q13.2	0.0110229
LRRC6	8q24.22	0.0110246
RBMX	Xq26.3	0.0110776
PDE4D	5q12	0.0111398
MMP19	12q14	0.0111433
DDX3X	Xp11.3-p11.23	0.0112037
SEPW1	19q13.3	0.0112141
ZNF26	12q24.33	0.0113002
CGRRF1	14q22.2	0.011303
KAT2B	3p24	0.0113472
HMOX1	22q13.1	0.0113812
MAN1A2	1p13	0.011383
AHR	7p15	0.0113949
LITAF	16p13.13	0.0113954
LOC100505635	6p21.2	0.0114485
PTPRD	9p23-p24.3	0.0115782
LOC105369167	---	0.0115826
BRE-AS1	2p23	0.011599
GPC1	2q35-q37	0.0116904
GALC	14q31	0.0116958
ANKRD13C	1p31.1	0.0117283
MCM9	6q22.31	0.0117667
POLK	5q13	0.0117701
LOC101927870	---	0.0117839
ADGRG1	16q21	0.0117947
ARID4A	14q23.1	0.0118362
FCGR3B	1q23	0.01184
ST3GAL2	16q22.1	0.0118484
DAB2	5p13.1	0.0118613
GPR173	Xp11	0.0118919
CAPN1	11q13	0.0119351
RBBP6	16p12.2	0.0119395
EVI2A	17q11.2	0.0119747
FCHSD2	11q13.4	0.0119964
CD40	20q12-q13.2	0.0120303
PCOLCE	7q22	0.0120428
AKAP11	13q14.11	0.012054
RBMS3	3p24-p23	0.0121084
ATP2B2	3p25.3	0.0121234
ADCY7	16q12.1	0.012206
CD9	12p13.3	0.0122074
HDAC4	2q37.3	0.0122536
TNFSF9	19p13.3	0.0122687
ARL4C	2q37.1	0.0122816
SDHD	11q23	0.0122986
LRMP	12p12.1	0.0123001
CELSR1	22q13.3	0.01231
A2ML1	12p13.31	0.0123345
SHC1	1q21	0.012419
CNTFR	9p13	0.0124258
GALK2	15q21.1-q21.2	0.012436
TBX2	17q23.2	0.0124414
PDE4DIP	1q12	0.0124579
C1orf210	1p34.2	0.0124729
ZNF641	12q13.11	0.0124778
FGD2	6p21.2	0.0124974
LINC00857	10q22.3	0.0125034
FBXO7	22q12.3	0.0125433
B4GALT1	9p13	0.012548
CYTH4	22q12.3-q13.1	0.0125573
LYPD8	1q44	0.0125974
RUNX1	21q22.3	0.0126436
WDR1	4p16.1	0.0127693
FRYL	4p11	0.0128181
PFKL	21q22.3	0.012877
ZNF621	3p22.1	0.0128912
SEPT7P9	10p11.1	0.0128917
ANHX	12q24.33	0.012892
SEMA3C	7q21-q31	0.0129343
ADAM8	10q26.3	0.0129624
CD63	12q12-q13	0.0129752
AP1S2	Xp22.2	0.0130304
SH2B3	12q24	0.0130394
FNDC3A	13q14.2	0.0130988
SESN3	11q21	0.0131056
ICAM1	19p13.3-p13.2	0.013107
FPGS	9q34.1	0.0131118
LARGE-AS1	---	0.0131253
MPZL3	11q23.3	0.0131307
TTLL13P	15q26.1	0.0131522
CC2D2A	4p15.32	0.0131622
LOC100287290	3q25.32	0.0131734
SLC6A6	3p25.1	0.0132928
DGKA	12q13.3	0.0133005
CLN6	15q23	0.0133109
GNA13	17q24.3	0.0133196
RPS6KA2	6q27	0.0133222
HSD11B1	1q32-q41	0.0134068
PFKFB3	10p15.1	0.0134188
IMMP2L	7q31	0.0134255
MB	22q13.1	0.0134305
TGFB1	19q13.1	0.0134307
OCA2	15q	0.0134312
SLC35G2	3q22.3	0.0134581
TSC22D3	Xq22.3	0.0134757
IRF2	4q34.1-q35.1	0.0135068
OXSR1	3p22.2	0.0136162
TNFAIP1	17q22-q23	0.0136197
TNFRSF1B	1p36.22	0.0137182
RPL36A-HNRNPH2	Xq22.1	0.0137565
INPP1	2q32	0.0137647
FKBP15	9q32	0.0138056
SYNCRIP	6q14-q15	0.0138642
KIF13B	8p12	0.0138798
MLLT3	9p22	0.0138978
KIF5B	10p11.22	0.0139745
ADGRE5	19p13.12	0.0139878
PAX5	9p13	0.0140513
TREML3P	6p21.1	0.0140666
FOXO1	13q14.1	0.0140772
NDUFS2	1q23	0.0140899
NRCAM	7q31	0.0141298
S100Z	5q13.3	0.0141703
SLCO2B1	11q13	0.0141894
CST1	20p11.21	0.0142816
PLEK	2p13.3	0.014346
DAPK2	15q22.31	0.0143853
DEPDC1-AS1	---	0.0143979
ZNF320	4q32.3	0.0144036
CSF2RB	22q13.1	0.014406
TTL	2q13	0.0144195
TPST2	22q12.1	0.0145277
FGF18	5q34	0.014544
KIAA0141	5q31.3	0.0145868
CASP10	2q33-q34	0.014594
FAM53A	4p16.3	0.0146026
COTL1	16q24.1	0.0146027
LOC105379704	---	0.0146224
UGCG	9q31	0.0146407
HOXB5	17q21.3	0.0146953
ATP7A	Xq21.1	0.0147358
KRT75	12q13	0.0147526
ARHGAP25	2p13.3	0.0149313
FCRL2	1q21	0.0149749
PXK	3p14.3	0.0151251
LAYN	11q23.1	0.0151709
PIK3CG	7q22.3	0.0151712
CCR1	3p21	0.0152346
C2CD2L	11q23.3	0.0152686
ELL	19p13.1	0.015313
RAB7A	3q21.3	0.0153202
RECK	9p13.3	0.0153397
XRCC4	5q14.2	0.0153807
VAV1	19p13.3	0.0154161
MAP3K14	17q21	0.0154823
AK7	14q32.2	0.0155296
PPP1R12B	1q32.1	0.0155351
MYO1E	15q22.2	0.0155376
ANPEP	15q25-q26	0.0155737
FOLR2	11q13.3-q13.5	0.0155859
TSPEAR-AS2	21q22.3	0.0156457
OR5J2	11q11	0.0156638
LIPC	15q21-q23	0.0156712
CYB5B	16q22.1	0.0156741
SEMA5A	5p15.2	0.0157155
PLCB4	20p12	0.0157387
CYBB	Xp21.1	0.0157747
CEP112	17q24.1	0.0159066
DPP4	2q24.3	0.0159075
MACC1	7p21.1	0.0159528
WNK1	12p13.3	0.0160295
KCNK15	20q13.12	0.0160514
HSF2BP	21q22.3	0.01606
NR2C1	12q22	0.0160613
SOHLH1	9q34.3	0.0160796
CYP2E1	10q26.3	0.0161031
MBNL1	3q25	0.0161929
LETM2	8p11.23	0.0162307
COG5	7q31	0.0162499
ITGB1	10p11.2	0.0162621
SUSD6	14q24.1	0.0162865
IRAK1BP1	6q14-q15	0.0162866
TAS2R40	7q34	0.0163173
NCOR1	17p11.2	0.0163246
ABCB9	12q24	0.0163418
MAP2K1	15q22.1-q22.33	0.0163489
VRK3	19q13	0.0163593
CLDN19	1p34.2	0.0163652
FOXP1	3p14.1	0.0163716
ATXN2	12q24.1	0.0163785
ALDH3B1	11q13	0.0164052
ANOS1	Xp22.32	0.0164074
SQSTM1	5q35	0.0164079
B3GALNT2	1q42.3	0.0164114
KMT2A	11q23	0.0164252
SLC22A23	6p25.2	0.0165234
YPEL2	17q22	0.0165809
LIMS1	2q12.3	0.0166415
CAPNS1	19q13.12	0.0166819
FGD6	12q22	0.0167041
FAM65B	6p22.3-p21.32	0.0167218
GJA1	6q22.31	0.0167252
NDUFA7	19p13.2	0.0167804
WASF3	13q12	0.0168306
CFI	4q25	0.0169026
CD209	19p13	0.0169326
KL	13q12	0.016964
CD2BP2	16p11.2	0.0169786
PBX1	1q23	0.0170428
C15orf38-AP3S2	15q26.1	0.0170716
TMED5	1p22.1	0.0171107
ABCF3	3q27.1	0.0171386
FAM43A	3q29	0.0171833
TNFRSF10A	8p21	0.0172223
NPAS3	14q13.1	0.0172677
DAZAP2	12q12	0.0172784
ARHGEF7	13q34	0.0173128
GIN1	5q21.1	0.0173542
NRP1	10p12	0.0173558
SGCB	4q12	0.0173924
RGS3	9q32	0.0174021
CBR3	21q22.2	0.0174061
ZCCHC7	9p13.2	0.0174725
MCL1	1q21	0.0174735
ZNF70	22q11.23	0.0174955
DVL3	3q27	0.0175004
MRPL57	13q12.11	0.0175111
PRRX1	1q24	0.0175227
SETD5	3p25.3	0.0175608
SIX3	2p21	0.0175685
VAMP5	2p11.2	0.0175768
NGFR	17q21-q22	0.0176081
LRP11	6q25.1	0.017613
MIR3945HG	---	0.017615
HLA-E	6p21.3	0.0176257
HMCES	3q21.3	0.0176451
STAT2	12q13.3	0.0176492
C12orf66	12q14.2	0.0176738
PTPRF	1p34	0.0176857
SCG5	15q13-q14	0.0177771
RPS6KA3	Xp22.2-p22.1	0.0177958
CEP78	9q21.2	0.0178277
LINC00632	Xq27.1	0.0178602
DGKB	7p21.2	0.0179337
PAPOLG	2p16.1	0.0179354
HAVCR2	5q33.3	0.0179625
ITGB3	17q21.32	0.0180088
TRPM3	9q21.12	0.0180891
KLHDC7B	22q13.33	0.0180893
SLAMF9	1q23.2	0.0181129
MAP3K8	10p11.23	0.0181232
USP13	3q26.2-q26.3	0.0181466
SLC35F6	2p23.3	0.0181564
MAPK12	22q13.33	0.0181634
RASA3	13q34	0.0181672
CDKAL1	6p22.3	0.018188
CHD4	12p13	0.0181975
RHOJ	14q23.2	0.0182167
NF2	22q12.2	0.0182212
LINC00907	18q12.3	0.0182507
PKN1	19p13.12	0.018286
SPIN3	Xp11.21	0.0183213
DEDD	1q23.3	0.0183279
SOBP	6q21	0.0183547
LTBR	12p13	0.0184113
XPNPEP2	Xq25	0.0184506
TNF	6p21.3	0.0185032
ARF6	14q21.3	0.0185036
INIP	9q32	0.0185165
EDEM1	3p26.1	0.0185215
HDAC9	7p21.1	0.0185767
NBEAL2	3p21.31	0.0185839
LOC100310756	8q24.3	0.0185962
S100A13	1q21	0.0186118
GULP1	2q32.3-q33	0.0186497
CTSC	11q14.2	0.0186656
RAPGEF6	5q31.1	0.0186853
PRKCA	17q22-q23.2	0.0186986
GRK6	5q35	0.0187003
LOC101927143	---	0.0187226
PCSK5	9q21.3	0.0187352
ADGRG3	16q21	0.0187676
TMEM109	11q12.2	0.0187802
CDK8	13q12	0.0187859
MMEL1	1p36	0.018808
PECAM1	17q23.3	0.0188753
PDE7A	8q13	0.0188871
ANK2	4q25-q27	0.0189156
RPP14	3p14.3	0.0189175
SVIL	10p11.2	0.0189432
PSEN2	1q42.13	0.0189617
MTG2	20q13.33	0.0189799
SFRP4	7p14.1	0.0189824
ARL1	12q23.2	0.0189987
MFNG	22q12	0.0190154
GNPAT	1q42	0.019024
RECQL4	8q24.3	0.0190963
TLL1	4q32.3	0.0191406
CD84	1q24	0.0191911
PKIA	8q21.12	0.0192163
PPP6C	9q33.3	0.0192465
UTP14C	13q14.2	0.0192573
ERH	14q24.1	0.0192662
LOC101927657	8q24.21	0.0192664
TPCN1	12q24.13	0.019282
PHF20L1	8q24.22	0.0192981
IFNGR1	6q23.3	0.0193001
TUBB2A	6p25	0.0193003
TEX9	15q21.3	0.0193064
PDE6A	5q31.2-q34	0.0193321
AP5M1	14q22.3	0.0193857
AAK1	2p14	0.0194042
MPP1	Xq28	0.0194106
TERF1	8q21.11	0.0194181
KAT6B	10q22.2	0.0194611
RIMS1	6q12-q13	0.0194669
SVEP1	9q32	0.0194956
POU6F1	12q13.13	0.0194995
LGALS7	19q13.2	0.0195297
LACC1	13q14.11	0.0195553
KCNJ2	17q24.3	0.0195753
ATP6	---	0.0196
MEDAG	13q12.3	0.0196597
CEP57	11q21	0.0197248
RAB21	12q21.1	0.0197397
INTS6	13q14.3	0.0197784
DUSP3	17q21	0.0197983
CHL1	3p26.1	0.019828
RAPGEF5	7p15.3	0.0198854
EHBP1L1	11q13.1	0.0199129
FLJ37786	1q21	0.019917
PARN	16p13	0.0199207
RAD23B	9q31.2	0.0199488
CACNA1D	3p14.3	0.0200179
ZNF396	18q12	0.0200684
C6orf106	6p21.31	0.0200715
LOC105369434	---	0.0200948
CSTF2	Xq22.1	0.0202125
KRT19	17q21.2	0.0202244
STK24	13q31.2-q32.3	0.020244
MCTP2	15q26.2	0.020246
FBLN1	22q13.31	0.020282
TRIM14	9q22.33	0.0202944
MKNK1	1p33	0.0203233
PRM1	16p13.2	0.0203389
LINC01505	9q31.2	0.0204152
CDC42BPA	1q42.11	0.0205366
TMEM184A	7p22.3	0.0205536
PHLDB2	3q13.2	0.0206251
CCDC34	11p14.1	0.0207266
NBEAL1	20q13.2	0.0207803
THRA	17q11.2	0.0207932
CLIP1	12q24.3	0.0207966
NBPF3	1p36.12	0.0208221
SHC3	9q22.1	0.0209491
GAL3ST3	11q13.1	0.0209821
TRIM40	6p22.1	0.0209927
SOCS4	14q22.1	0.0210326
SCOC-AS1	4q31.1	0.0211088
PTPN18	2q21.1	0.0211304
MBNL2	13q32.1	0.0211343
GATA4	8p23.1-p22	0.0211983
HRH1	3p25	0.0212328
KYNU	2q22.2	0.0212612
LINC00092	9q22.32	0.0212852
TRIM36	5q22.3	0.0212964
PPP1R12A	12q15-q21	0.0213583
MAP3K6	1p36.11	0.0213594
CD37	19q13.3	0.0213603
RBM15	1p13	0.0213642
MATN1	1p35	0.0213763
KIF23	15q23	0.021419
FRAS1	4q21.21	0.021422
PSEN1	14q24.3	0.0214845
S100A1	1q21	0.0214901
VPS11	11q23	0.0215612
LPAR6	13q14	0.0216706
FCGR2A	1q23	0.0216721
MFAP3	5q32-q33.2	0.0217176
PROCR	20q11.2	0.021718
CH25H	10q23	0.021795
ZFP37	9q32	0.0218038
DKK3	11p15.2	0.0218043
HDGFRP3	15q25.2	0.021816
TP53I11	11p11.2	0.0218472
GTF2E2	8p12	0.0218992
IRAK2	3p25.3	0.021922
GNG10	9q31.3	0.0219333
RPL32P3	3q21.3	0.0219667
FMNL1	17q21	0.0220428
SCRN3	2q31.1	0.0220841
TRAFD1	12q	0.0220891
POLH	6p21.1	0.0221507
MAPKAPK3	3p21.3	0.0221655
XYLB	3p22-p21.3	0.0222036
CALB1	8q21.3	0.0222298
TCIRG1	11q13.2	0.0222427
SBNO2	19p13.3	0.0222444
EHD2	19q13.3	0.0223059
CUL4B	Xq23	0.0223364
HSP90B1	12q24.2-q24.3	0.0223803
HOXD1	2q31.1	0.0224098
B9D1	17p11.2	0.0224696
CTSG	14q11.2	0.02251
USP36	17q25.3	0.0225993
ALDH1A3	15q26.3	0.022608
MYNN	3q26.2	0.0226394
MGC57346	17q21.31	0.0226512
TOR1AIP2	1q25.2	0.0226927
PFN1	17p13.3	0.0227599
CNPPD1	2q35	0.0228222
CIB1	15q25.3-q26	0.0228314
ATP6V1C1	8q22.3	0.0228474
LOC100132077	9q22.32	0.0229697
ATP6V0E1	5q35.1	0.0230294
ACVR2B	3p22	0.023037
ICAM2	17q23.3	0.0230987
TPMT	6p22.3	0.0232423
MIEF1	22q13	0.0232425
KPNA1	3q21	0.0232563
ZC2HC1A	8q21.12	0.0233242
XIAP	Xq25	0.023373
HIF1A	14q23.2	0.0233956
FCGR2A	1q23	0.0234461
PHKA1	Xq12-q13	0.0234517
COL1A1	17q21.33	0.0236284
NRG1	8p12	0.0236441
ST8SIA4	5q21	0.0237006
CCL20	2q36.3	0.0237715
GNG12	1p31.3	0.0237977
MASP1	3q27-q28	0.0238341
ACVR1	2q23-q24	0.0238659
LAPTM5	1p34	0.0238854
GUCY1B3	4q31.3-q33	0.0239176
LOC101927849	---	0.0239357
LMO1	11p15	0.0239552
ZPR1	11q23.3	0.0239568
CEP70	3q22.3	0.0239597
CCDC150	2q33.1	0.0239663
ZNF286A	17p11.2	0.0239874
CD28	2q33	0.023994
NBL1	1p36.13	0.0239966
ELF4	Xq26	0.0240107
NCF4	22q13.1	0.0240134
BAG6	6p21.3	0.0240219
ALDOB	9q21.3-q22.2	0.0240226
GPR183	13q32.3	0.0240674
ZCCHC10	5q31.1	0.0240959
JAK1	1p32.3-p31.3	0.0241072
SMARCA1	Xq25	0.0241088
CDC42BPB	14q32.3	0.0241339
ZNF518A	10q24.1	0.0241947
TMEM37	2q14.2	0.0242025
SERP2	13q14.11	0.0242836
RASAL2	1q24	0.0242897
PDGFRL	8p22-p21.3	0.0243399
NFIL3	9q22	0.0243634
FBXO42	1p36.23-p36.11	0.0243723
HLA-DQA1	6p21.3	0.0243783
C15orf39	15q24.2	0.0243804
CTSB	8p22	0.0244466
EHHADH	3q26.3-q28	0.0244669
KHK	2p23.3	0.0244771
KCTD7	7q11.21	0.0245159
BRD8	5q31	0.0245419
PIANP	12p13.31	0.0245865
DLGAP1	18p11.31	0.024612
MLH1	3p21.3	0.0246723
ZMYM4	1p32-p34	0.0246779
SOX6	11p15.3	0.0246785
ZYX	7q32	0.0246791
AKNA	9q32	0.0246849
LRIG2	1p13.1	0.0246976
CXCL2	4q21	0.0247159
TMTC3	12q21.32	0.0247725
PLXNA4	7q32.3	0.0247964
C2CD3	11q13.4	0.0248171
SRGAP2	1p11.2	0.0248212
KCNH5	14q23.2	0.0248723
PSMA7	20q13.33	0.0249328
MAP3K3	17q23.3	0.024973
DNAJB1	19p13.2	0.0250089
MT1G	16q13	0.0251412
PPIL6	6q21	0.0251494
FHL2	2q12.2	0.0251939
IRAK3	12q14.3	0.0252087
HBB	11p15.5	0.025265
ATF3	1q32.3	0.0253295
C14orf105	14q22.3	0.0253414
SEMA3B	3p21.3	0.0253563
RHBDL3	17q11.2	0.0255108
ARL4D	17q21.31	0.0256527
ELFN2	22q13.1	0.0256719
ZAK	2q24.2	0.025719
S100A12	1q21	0.0257532
CCDC141	2q31.2	0.0257737
FKBP4	12p13.33	0.0257781
PLA2G4C	19q13.3	0.0257907
PCBP3	21q22.3	0.0258066
BACH1	21q22.11	0.0258341
FEZ1	11q24.2	0.025855
PHACTR2	6q24.2	0.0259421
AREL1	14q24.3	0.0259504
PPP1R2	3q29	0.0259643
BMX	Xp22.2	0.0259684
LCP2	5q35.1	0.0259849
MST1R	3p21.3	0.0260006
TLE4	9q21.31	0.0260222
SUMO3	21q22.3	0.0260295
ABCC5	3q27	0.0260511
FOXP1-AS1	3p13	0.0260714
SEC14L1	17q25.2	0.0261038
RELA	11q13	0.0261358
HDX	Xq21.1	0.0261492
CMTM6	3p22.3	0.0262688
PLEKHB2	2q21.1	0.0262741
DAPK3	19p13.3	0.0262784
F13A1	6p25.3-p24.3	0.0262886
FGFR2	10q26	0.0262886
LOC100506585	---	0.0262932
E2F4	16q22.1	0.0263175
TRADD	16q22	0.0264543
OR5P3	11p15.4	0.0264596
C1orf43	1q21.2	0.026464
EDNRB	13q22	0.0265398
SV2A	1q21.2	0.0265662
GSTA4	6p12.1	0.0266271
PLXND1	3q22.1	0.0266322
TRIP12	2q36.3	0.0266604
VGLL1	Xq26.3	0.0267071
NSA2	5q13.3	0.0269933
PIEZO2	18p11.22	0.0269969
RYBP	3p13	0.027007
MYO1D	17q11.2	0.0270073
FH	1q42.1	0.027023
WASL	7q31.3	0.027032
MAN2A1	5q21.3	0.0270413
STX5	11q12.3	0.0270574
NME5	5q31	0.0271139
CDH5	16q22.1	0.0271276
ADARB1	21q22.3	0.0271453
PSMB4	1q21	0.027164
MAGEE1	Xq13.3	0.0272357
FBXO9	6p12.3-p11.2	0.0273156
PMVK	1q22	0.0273299
LOC100291323	---	0.0274899
DNAJB9	7q31|14q24.2-q24.3	0.0275109
ZBTB38	3q23	0.0275267
DIO1	1p33-p32	0.0275479
PER2	2q37.3	0.0275748
ADAMTS5	21q21.3	0.0277372
HS3ST3B1	17p12	0.0277688
KMT2B	19q13.1	0.0277932
LOC101928632	---	0.0279721
RAD21	8q24	0.0280828
RBM25	14q24.3	0.0280963
MTBP	8q24.12	0.0281021
CD99	Xp22.32 and Yp11.3	0.0281533
PTPRN2	7q36	0.0281868
FMO1	1q24.3	0.02819
RHOBTB2	8p21.3	0.0282193
CYP4F35P	18p11.21	0.0283046
IFT122	3q21	0.0284427
TCOF1	5q32	0.0284596
ARHGAP1	11p11.2	0.0284764
LOC100128288	17p13.1	0.0284981
STXBP2	19p13.3-p13.2	0.028502
CD86	3q21	0.0285187
PKIG	20q12-q13.1	0.0285736
GTF2E1	3q21-q24	0.0285988
SLC16A7	12q13	0.0286707
LINC01333	5q13.3	0.0286893
GIGYF2	2q37.1	0.0287455
MARCKS	6q22.2	0.0287647
JPX	Xq13.2	0.0287938
SLC8A3	14q24.1	0.0288567
CARD8-AS1	---	0.0289022
EMILIN1	2p23.3-p23.2	0.0289114
BCHE	3q26.1-q26.2	0.0289226
ZNF548	19q13.43	0.0289706
PRAME	22q11.22	0.029005
ZNF254	19p12	0.0290814
LOC101927809	---	0.0290832
NOVA2	19q13.3	0.0290862
TMEM163	2q21.3	0.0291017
FILIP1	6q14.1	0.0291257
PRKAR1A	17q24.2	0.029142
SREBF2	22q13	0.0291423
LEPR	1p31	0.0292352
ATAD3A	1p36.33	0.0292452
SCIN	7p21.3	0.0292467
PPA2	4q25	0.0292515
FOSB	19q13.32	0.0292668
MEGF11	15q22.31	0.0293508
RASEF	9q21.32	0.0294037
HOPX	4q12	0.0294466
KIAA0196	8q24.13	0.0295149
TRIM21	11p15.5	0.0295863
ADAT3	19p13.3	0.0296718
DGAT1	8q24.3	0.0297051
GK5	3q23	0.029709
ALAS1	3p21.1	0.0297751
TMEM135	11q14.2	0.0298414
CNOT7	8p22-p21.3	0.0298419
CEP120	5q23.2	0.029961
ZC3H12C	11q22.3	0.030007
ENO1	1p36.2	0.0300073
HMGCS1	5p14-p13	0.0300203
ZNF222	19q13.2	0.030046
IL17RA	22q11.1	0.0300628
CEP128	14q31.1	0.0300681
CCNT2	2q21.3	0.0301596
SPATA17	1q41	0.0301769
TACC1	8p11.22	0.0302175
VWF	12p13.3	0.0302294
TFDP1	13q34	0.0302403
ENO3	17p13.2	0.0302612
ARHGAP27	17q21.31	0.0302629
GTPBP1	22q13.1	0.0302637
SMC3	10q25	0.030287
POLA1	Xp22.1-p21.3	0.0303537
SCARA5	8p21.1	0.0303888
BNIPL	1q21.3	0.0303975
FILIP1L	3q12.1	0.0304103
TTLL5	14q24.3	0.030455
TIGD1	2q37.1	0.0304761
ZNF136	19p13.2	0.0304782
FLT3LG	19q13.3	0.0305044
GUCA1A	6p21.1	0.0305275
LDB2	4p16	0.0306547
RAB42	1p35.3	0.0306582
CTBP2	10q26.13	0.0306611
STOML1	15q24.1	0.030678
PCDH7	4p15	0.0307444
ALOX5	10q11.2	0.0307704
RANGAP1	22q13	0.0307989
RRAD	16q22	0.0308483
RPRML	17q21.32	0.0308553
LDLR	19p13.2	0.030907
NCOA3	20q12	0.0310562
PDGFA	7p22	0.0310715
TRAP1	16p13.3	0.0311094
IGSF3	1p13	0.0311097
ITGAX	16p11.2	0.0311158
PAWR	12q21	0.0311364
LOC105369477	---	0.0311401
RTN2	19q13.32	0.031228
OPRL1	20q13.33	0.0312363
MALAT1	11q13.1	0.0312494
ZNF585A	19q13.12	0.0312854
FAN1	15q13.2-q13.3	0.0312856
LRRC28	15q26.3	0.0313497
SRGAP2B	1p11.2	0.0313661
FBF1	17q25.1	0.0313766
MAPRE1	20q11.1-q11.23	0.0314082
GPRIN3	4q22.1	0.0314649
WDHD1	14q22.2	0.031508
LOC105373547	---	0.0315103
ZNF398	7q36.1	0.0315444
PRLR	5p13.2	0.0315711
CRISPLD2	16q24.1	0.0315714
AP1B1	22q12.2	0.0316374
FBN1	15q21.1	0.031662
DCAF8	1q22-q23	0.0317137
CDKN1A	6p21.2	0.0317174
SMPD2	6q21	0.03174
TRIM25	17q23.2	0.0317838
LMF1	16p13.3	0.0318109
GPATCH11	2p22.2	0.0319018
LOC101929261	---	0.0319208
RFWD2	1q25.1-q25.2	0.0319495
KLHL3	5q31	0.031968
PPP1R3B	8p23.1	0.0320687
FBXL14	12p13.33	0.0321089
Dbpht2	12|12 C3	0.032142
FAM212B	1p13.2	0.032207
MROH1	8q24.3	0.0322249
ESYT3	3q22.3	0.0322825
CHD1	5q15-q21	0.032308
LRRN4CL	11q12.3	0.0323559
PHTF1	1p13	0.0323951
PPP2R5E	14q23.1	0.0324328
ZNF560	19p13.2	0.0324345
SLC20A1	2q13	0.0324506
DBT	1p31	0.0324792
PLIN3	19p13.3	0.0324811
VAPB	20q13.33	0.0324862
CD93	20p11.21	0.0324908
ZSCAN4	19q13.43	0.0324993
TMTC4	13q32.3	0.0325566
SPINK1	5q32	0.0325953
STOM	9q34.1	0.0326396
CD44	11p13	0.0326789
IFI16	1q22	0.0327167
TAS1R1	1p36.23	0.0327782
CFAP53	18q21.1	0.032791
ANTXR2	4q21.21	0.0328238
ANAPC5	12q24.31	0.032881
FLT1	13q12	0.0329194
RFX1	19p13.1	0.0329756
DNAH6	2p11.2	0.0330176
FLT3	13q12	0.0330579
TNFSF10	3q26	0.0331192
MAP4	3p21	0.0331588
MACC1	7p21.1	0.0331605
AFF3	2q11.2-q12	0.0331987
ADNP2	18q23	0.0332035
GAS6	13q34	0.0332291
UBE2B	5q31.1	0.0332315
EMID1	22q12.2	0.0332331
LOC101929473	11q24.2	0.0332378
NR3C2	4q31.1	0.0332675
EPB41L3	18p11.32	0.0332778
MYRF	11q12-q13.1	0.0334113
PLA2G2A	1p35	0.0334279
LINC01588	14q21.3	0.0334393
PDS5B	13q12.3	0.0334649
GATB	4q31.3	0.0334849
ECM2	9q22.3	0.0334958
FBXO39	17p13.1	0.0335457
TIAL1	10q	0.0335535
MIA3	1q41	0.0335571
LYN	8q13	0.0335727
POLD4	11q13	0.0336177
KCNN3	1q21.3	0.0336245
TOM1L1	17q23.2	0.0336841
PTP4A1	6q12	0.033706
ETHE1	19q13.31	0.0337067
PVRL2	19q13.2	0.033718
ACVR2A	2q22.3	0.0337197
G3BP1	5q33.1	0.0337245
IL10RA	11q23	0.0337881
TYMP	22q13.33	0.033797
GHR	5p13-p12	0.0338284
ZBTB1	14q23.3	0.0338417
FBXO18	10p15.1	0.0339893
RPL31	2q11.2	0.0340072
CCL21	9p13	0.034024
UGDH	4p15.1	0.0340609
SLC31A2	9q32	0.0341115
DRAXIN	1p36.22	0.0341562
TBC1D9B	5q35.3	0.0342165
ENTPD4	8p21.3	0.0342462
PKD1	16p13.3	0.0342539
ROR1	1p31.3	0.0342603
LUM	12q21.33	0.0343083
HBA1	16p13.3	0.034365
GBF1	10q24	0.0343976
GNG2	14q21	0.0344319
SDS	12q24.13	0.0344529
NFKBIA	14q13	0.0344939
IL13RA2	Xq23	0.0344983
SLC2A5	1p36.2	0.0345057
USP49	6p21	0.0345724
DNASE1L3	3p14.3	0.0345971
TTF2	1p22	0.0346165
THUMPD3-AS1	3p25.3	0.0346779
SKIL	3q26	0.0346893
ELF3	1q32.2	0.0347179
RAB33A	Xq26.1	0.0347253
ZNF91	19p12	0.0347515
COX6C	8q22.2	0.0347794
MIS18BP1	14q21.2	0.0347921
SLC39A14	8p21.3	0.0348117
PRKCH	14q23.1	0.0349536
IL1R1	2q12	0.0349566
RPS3A	4q31.2-q31.3	0.0349641
PTPRG	3p21-p14	0.0349668
ARHGEF15	17p13.1	0.0350254
WDR62	19q13.12	0.035168
LRRC7	1p31.1	0.0351884
BIN3	8p21.3	0.0353375
ORAI2	7q22.1	0.0353461
GIPC3	19p13.3	0.0353823
RGS10	10q25	0.0354443
KDM5B	1q32.1	0.0354509
PTPN1	20q13.1-q13.2	0.0355076
SPEN	1p36	0.0355175
AFF4	5q31	0.0355778
UBB	17p12-p11.2	0.035609
SGSH	17q25.3	0.0357299
CFP	Xp11.4	0.0357554
RPL32	3p25-p24	0.0358206
CLEC4G	19p13.2	0.0358502
RHOH	4p13	0.0358939
PSMD2	3q27.1	0.0359425
LYST	1q42.1-q42.2	0.0359583
SEL1L	14q31	0.0360491
COBL	7p12.1	0.0360778
HBD	11p15.5	0.0361924
TGM2	20q12	0.036256
COX10-AS1	---	0.0362696
LIPT1	2q11.2	0.0363107
SCAMP1	5q14.1	0.036476
RPL29	3p21.3-p21.2	0.0365041
CELF1	11p11	0.0365387
HIVEP1	6p24-p22.3	0.0366327
MMP2	16q12.2	0.0366396
ZFP36L2	2p22.3-p21	0.0366514
RPL11	1p36.1-p35	0.0367992
CECR9	---	0.0368032
INTS4	11q14.1	0.0368187
FAM185A	7q22.1	0.0368395
TRAPPC13	5q12.3	0.0368561
NMNAT2	1q25	0.0368689
ZNF626	19p12	0.0368979
2018-09-07	7p14.2	0.0369366
ZNF33B	10q11.2	0.0369389
SAMSN1	21q11	0.036968
PDHA1	Xp22.1	0.0370807
CYTH1	17q25	0.0371211
CDON	11q24.2	0.0371306
TMEM171	5q13.2	0.0371775
KCNQ2	20q13.3	0.0372185
CCNB2	15q22.2	0.0372345
CREB1	2q34	0.0372583
TRPC6	11q22.1	0.0372651
ACTR3B	7q36.1	0.0372843
TENM3	4q35.1	0.0373031
LOC105373434	---	0.0373704
ZADH2	18q22.3	0.0374708
SMTN	22q12.2	0.0374945
TIMM44	19p13.2	0.0375258
MINA	3q11.2	0.0375364
PSMD4	1q21.3	0.0375753
BAIAP2	17q25	0.0375893
GIMAP1	7q36.1	0.0376256
PRKCD	3p21.31	0.0377496
MTHFD1L	6q25.1	0.0377971
MYSM1	1p32.1	0.037884
ZNF826P	19p12	0.0379064
SREK1IP1	5q12.3	0.0379979
PRR5-ARHGAP8	22q13.31	0.0380328
SSBP1	7q34	0.0380779
RPL8	8q24.3	0.0382141
HOMER2	15q24.3	0.0382704
TMEM63A	1q42.12	0.0382849
LSAMP	3q13.31	0.038332
KRBA2	17p13.1	0.0383616
2018-09-11	4q21.1	0.0384386
SLC38A10	17q25.3	0.0385695
TMCO4	1p36.13	0.0386021
B3GNT6	11q13.4	0.0386845
LOC284926	22q13.31	0.038708
SLC7A1	13q12.3	0.0387263
ALOX5AP	13q12	0.0387613
ATXN3	14q21	0.0388271
EIF3C	16p11.2	0.0388275
CDC14A	1p21	0.0388529
ADGRL1	19p13.2	0.0388965
NPAS2	2q11.2	0.038954
KRIT1	7q21.2	0.0390051
LOC283788	---	0.0390142
SERPINB5	18q21.33	0.0390356
DIO2	14q24.2-q24.3	0.0390613
ITM2A	Xq13.3-Xq21.2	0.0390936
CYP19A1	15q21.1	0.0391023
SUPT7L	2p23.3	0.0391059
LINC00623	1q21.1	0.0391487
TTBK2	15q15.2	0.0391995
DBN1	5q35.3	0.0392145
CKMT1A	15q15	0.0392345
RNF141	11p15.4	0.0392359
FRMPD1	9p13.2	0.0392545
PDGFRB	5q33.1	0.0392901
PSMB2	1p34.2	0.0393184
PTX3	3q25	0.0394535
MOB4	2q33.1	0.0394543
LOC100130950	17p13.2	0.039571
BEND5	1p33	0.0395829
ACSL4	Xq22.3-q23	0.0395968
MCPH1	8p23.1	0.0395983
HECTD4	12q24.13	0.039615
NLRC4	2p22.3	0.0396761
FAM69A	1p22.1	0.0396761
SNED1	2q37.3	0.0396768
CASP8	2q33-q34	0.0397064
EME2	16p13.3	0.0397434
FHL1	Xq26	0.0398329
MIER1	1p31.3	0.0398842
GJB3	1p34	0.0400045
ASXL2	2p24.1	0.0400293
CAV1	7q31.1	0.0401245
SLC19A1	21q22.3	0.0401396
SLC11A1	2q35	0.0402188
PPP2CB	8p12	0.0402386
BCL2L1	20q11.21	0.0402862
NOS3	7q36	0.0402998
HCAR3	12q24.31	0.0403571
CLEC7A	12p13.2	0.0404067
HELQ	4q21.23	0.0404122
RABIF	1q32.1	0.0404242
ETS2	21q22.2	0.0404544
ACTR3	2q14.1	0.040518
LOC105370792	---	0.0405328
TNFRSF11A	18q22.1	0.0405503
IRAK1	Xq28	0.0406459
PPP2R3C	14q13.2	0.0406532
EIF4G2	11p15	0.0406555
C22orf34	22q13.33	0.0406557
GMFG	19q13.2	0.0406917
PCM1	8p22-p21.3	0.0407445
SEMA3A	7p12.1	0.0407575
ATP6V1A	3q13.31	0.0407647
RNF13	3q25.1	0.0407799
SLC5A6	2p23	0.040804
PRMT2	21q22.3	0.0408439
PTP4A3	8q24.3	0.0408473
LEMD1-AS1	1q32.1	0.0408546
MDM2	12q14.3-q15	0.0408746
WISP2	20q13.12	0.0408965
ATG14	14q22.3	0.0409844
SPN	16p11.2	0.0410132
CFAP157	9q34.11	0.0410296
RTEL1-TNFRSF6B	20q13.33	0.0410613
ADAM17	2p25	0.0410687
SIK3	11q23.3	0.0411191
C5orf24	5q31.1	0.0412072
JARID2	6p24-p23	0.0412663
LLGL2	17q25.1	0.0413633
SLC30A8	8q24.11	0.0413666
IFNLR1	1p36.11	0.0414179
IL27RA	19p13.11	0.0414974
RGS14	5q35.3	0.0415002
LINC01419	8q21.13	0.0416188
KLHL29	2p24.1	0.0416418
CCND2	12p13	0.0416731
DUSP19	2q32.1	0.041691
MSRB3	12q14.3	0.0416922
CXCL12	10q11.1	0.0417275
SLC9B1	4q24	0.0417802
AVPR1A	12q14.2	0.0418231
FXYD1	19q13.1	0.0418419
LOC285097	2q37.3	0.0418437
CLYBL-IT1	---	0.0418498
ZNF496	1q44	0.0419037
DPYSL2	8p22-p21	0.0419585
ARHGAP5	14q12	0.0419924
RNF216	7p22.1	0.0420673
ALG5	13q13.3	0.0420876
SNTB2	16q22.1	0.0421558
PCBP2	12q13.13	0.0421694
CTU2	16q24.3	0.0421783
BMP1	8p21.3	0.0421817
ITGA11	15q23	0.0422026
ZNF135	19q13.4	0.0422128
PREX2	8q13.2	0.0422365
ROCK1	18q11.1	0.0422564
REL	2p13-p12	0.0422619
SCN8A	12q13	0.0423565
RNF130	5q35.3	0.0423855
EGR3	8p23-p21	0.042402
ATP4B	13q34	0.0424221
CANX	5q35	0.0424285
GRAP	17p11.2	0.0424472
KCNQ1OT1	11p15	0.0425795
EIF3M	11p13	0.0425822
FN1	2q34	0.0425829
LOC101927237	---	0.042753
NEB	2q22	0.0427895
TCP11L1	11p13	0.0428141
NAP1L3	Xq21.3-q22	0.0428223
LCMT2	15q15.3	0.0428271
CD82	11p11.2	0.042866
TFEC	7q31.2	0.0428934
ZNF599	19q13.11	0.042918
TMEM182	2q12.1	0.0429263
SOD2	6q25.3	0.0429265
LOC401261	6p21.1	0.0429333
CXCR2	2q35	0.0429376
SCN3B	11q23.3	0.0430152
PTGS1	9q32-q33.3	0.0430337
PTPRC	1q31-q32	0.0431117
SPECC1L-ADORA2A	22q11.23	0.0431405
ACO1	9p21.1	0.0431976
ARHGEF4	2q22	0.0432005
CDC42SE2	5q31.1	0.0432413
GNAS	20q13.3	0.0432584
RPRD1A	18q12.2	0.043259
LOC105378011	---	0.0433635
CUBN	10p12.31	0.0433636
SLC30A5	5q12.1	0.043419
NAGA	22q11	0.0434328
STON2	14q31.1	0.0434929
LOC101927066	8q22.1	0.0434955
SP4	7p15.3	0.043517
TPR	1q25	0.0435223
VTN	17q11	0.0435432
RUNX1T1	8q22	0.0435624
LOC105372953	---	0.0436544
SORBS2	4q35.1	0.0436726
C14orf1	14q24.3	0.0437458
EEF1D	8q24.3	0.0438047
CLASP2	3p22.3	0.0439223
COL9A3	20q13.3	0.0439334
IKBKAP	9q31	0.0440205
PRSS23	11q14.1	0.0440374
IPP	1p34-p32	0.0440794
LOC100505727	---	0.0441313
HNRNPF	10q11.21	0.0441562
DNAJC6	1p31.3	0.0441725
HEXIM1	17q21.31	0.0442104
AGA	4q34.3	0.0442523
CDKN2AIPNL	5q31.1	0.0443234
PDE8A	15q25.3	0.0444227
MEF2D	1q12-q23	0.0444476
CNTNAP4	16q23.1	0.044454
FBXL13	7q22.1	0.0444546
ZDHHC14	6q25.3	0.044475
SLC34A3	9q34	0.0445777
CLTB	5q35	0.0446073
PGPEP1	19p13.11	0.0447289
TYROBP	19q13.12	0.0447893
RPL12	9q34	0.0447939
RGS13	1q31.2	0.0448437
HNRNPLL	2p22.1	0.0449253
CLUAP1	16p13.3	0.0449511
PPP2R5B	11q12	0.0450931
PDE1A	2q32.1	0.045111
CACNA2D1	7q21-q22	0.0451985
LRP1	12q13.3	0.0452194
SYT1	12cen-q21	0.0452903
GABRE	Xq28	0.0453222
TRIM23	5q12.3	0.0453266
GPLD1	6p22.1	0.0453742
SNX22	15q22.31	0.0454014
EBP	Xp11.23-p11.22	0.0454192
RAB35	12q24.31	0.0454741
LOC101929007	---	0.0455006
RAB4A	1q42-q43	0.0455273
MAN2A2	15q26.1	0.0455452
IL6ST	5q11.2	0.0456229
ATP6V0C	16p13.3	0.045643
BCL6B	17p13.1	0.0457233
WNK1	12p13.3	0.0457279
ATP6V1B2	8p21.3	0.0458862
PVT1	8q24	0.0458897
TMEM53	1p34.1	0.0459152
FLOT2	17q11.2	0.0459227
MFSD6L	17p13.1	0.0459487
UBA6	4q13.2	0.0459576
MYCBP2	13q22	0.0459585
MRC1	10p12.33	0.0459733
LOC283352	12q24.33	0.0460868
EMP1	12p12.3	0.0461065
CALM2	19q13.2-q13.3	0.0461085
C16orf45	16p13.11	0.0461365
MERTK	2q14.1	0.0461424
SLC16A2	Xq13.2	0.0461767
SLC30A9	4p13	0.0461797
CNTN1	12q11-q12	0.0462068
C8orf88	8q21.3	0.0462082
ZNF215	11p15.4	0.0462199
ICA1	7p22	0.0462401
PTPRO	12p13.3-p13.2|12p13-p12	0.0462579
CSTB	21q22.3	0.0462912
CSPP1	8q13.2	0.0463449
WASIR2	16p13.3	0.0464347
DNAH14	1q42.12	0.0464449
UBE4A	11q23.3	0.0464556
CALD1	7q33	0.0464587
ZBTB17	1p36.13	0.0465527
ALCAM	3q13.1	0.0465909
UEVLD	11p15.1	0.0465971
KCTD18	2q33.1	0.0466244
LINC01231	9p24.2	0.0466782
KLF6	10p15	0.0466892
LINC01330	3q26.1	0.0466945
DUSP18	22q12.2	0.0467585
FANCM	14q21.2	0.0468638
BNIP1	5q33-q34	0.0468814
SLA	8q24	0.0470017
DIEXF	1q32.2	0.0471212
TRAK2	2q33	0.0471692
TYRP1	9p23	0.047211
NAALAD2	11q14.3-q21	0.0472215
DUXAP8	14q11.2	0.0472233
CHSY1	15q26.3	0.0473767
RTN4IP1	6q21	0.0474067
TRIB2	2p24.3	0.0474176
PLA2G4E-AS1	15q15.1	0.0474501
RPL28	19q13.4	0.0475537
GGPS1	1q43	0.0475619
LINC01566	16p11.1	0.0475698
CTSLP8	9q22.1	0.047642
FAM201A	9p13.1	0.0476525
PCF11	11q13	0.0476604
RPS10	11p11.2	0.0476706
IFITM2	11p15.5	0.0477119
FOXF2	6p25.3	0.047728
SYTL4	Xq21.33	0.0477619
EPHA3	3p11.2	0.0477872
AKAP10	17p11.1	0.0478018
ZSCAN20	1p34.3	0.0479828
PDE3A	12p12	0.047993
GUCY2C	12p12	0.047998
GNA11	19p13.3	0.0479999
VCAM1	1p32-p31	0.0480864
CIRBP-AS1	19p13.3	0.0481192
LINC00593	15q23	0.0481451
BACH1	21q22.11	0.0481622
WFDC8	20q13.12	0.0481791
RAD23A	19p13.2	0.0482059
HIST1H4C	6p22.1	0.0482209
CD68	17p13	0.048251
ATP5SL	19q13.2	0.0483166
DIO3OS	14q32.31	0.048409
NOV	8q24.1	0.0484585
SPARCL1	4q22.1	0.0484919
CLN5	13q21.1-q32	0.0485274
CTSD	11p15.5	0.0485364
NLGN4X	Xp22.33	0.048713
KIAA1656	22q12.2	0.04873
GRIN2A	16p13.2	0.0487383
BTG4	11q23	0.0487672
KCND1	Xp11.23	0.048772
SH3PXD2B	5q35.1	0.04879
TIE1	1p34-p33	0.0487973
LINC00841	10q11.21	0.0488749
GABRB3	15q12	0.0489115
SPG7	16q24.3	0.0489118
COCH	14q11.2-q13	0.0489211
TXNL4A	18q23	0.0489246
CTSK	1q21	0.0489782
IVD	15q14-q15	0.0490025
RARRES1	3q25.32	0.0490571
SOX5	12p12.1	0.0490629
ZNF638	2p13.1	0.0491054
TCAF2	7q35	0.0491062
C12orf74	12q22	0.0491285
ZNF107	7q11.2	0.0491972
PLAU	10q22.2	0.0493529
PDE4C	19p13.11	0.0494808
NR1I3	1q23.3	0.0495066
IL7	8q12-q13	0.049628
ZNF430	19p12	0.0496331
ADM	11p15.4	0.0496364
PACRG-AS2	---	0.0496762
INPP4B	4q31.21	0.0496784
SRGN	10q22.1	0.0496921
GRK4	4p16.3	0.0497365
LOC729732	8p23.1	0.0497497
LRP10	14q11.2	0.0498035
PKP4	2q24.1	0.0498243
ILK	11p15.4	0.04983
ZSCAN30	18q12.2	0.049895
GFPT2	5q34-q35	0.0499026
SLC16A1-AS1	1p13.2	0.0499035
PNKD	2q35	0.0499084
FNIP2	4q32.1	0.0499199
IQSEC3	12p13.33	0.049938
C21orf58	21q22.3	0.0499402
HK1	10q22	0.0499523
CYP3A5	7q21.1	0.0499818
